# Supplementary material for: W Chromosome Evolution by Repeated Recycling in the Frog Glandirana rugosa
Source: MDPI journal article supplement (doi:10.3390/dna2030012), 2022-08-01
Supplement: s1 [file s1]

Archive with 2 entries (2 files):
- Figure S (pdf, legends).pdf
- Table sS1-S4.xlsx
