# Supplementary material for: W Chromosome Evolution by Repeated Recycling in the Frog Glandirana rugosa
Source: MDPI journal article supplement (doi:10.3390/dna2030012), 2022-08-01
Supplement: s1 [file s1 › Table sS1-S4.xlsx]

## Sheet: Table S1
	Table S1. Autosomal genetic markers (1626 SNPs ) isolated from 12 populations
	Ind.No.	Geographic group	sex chromosome	SNP genotype
				SNP1	SNP2	SNP3	SNP4	SNP5	SNP6	SNP7	SNP8	SNP9	SNP10	SNP11	SNP12	SNP13	SNP14	SNP15	SNP16	SNP17	SNP18	SNP19	SNP20	SNP21	SNP22	SNP23	SNP24	SNP25	SNP26	SNP27	SNP28	SNP29	SNP30	SNP31	SNP32	SNP33	SNP34	SNP35	SNP36	SNP37	SNP38	SNP39	SNP40	SNP41	SNP42	SNP43	SNP44	SNP45	SNP46
	kameyama3	XY	XY	2	0	0	0	1	0	0	0	0	2	0	0	0	0	0	0	0	2	1	0	0	0	0	0	0	0	0	0	0	0	0	1	2	0	2	0	0	0	0	0	2	1	0	1	0	0
	kameyama11	XY	XY	1	0	0	0	1	0	0	0	2	0	2	0	0	0	2	0	0	0	1	0	0	0	0	0	0	0	0	2	0	0	0	1	2	0	2	0	0	0	0	0	2	1	0	1	2	0
	kameyama12	XY	XY	1	0	0	0	1	0	2	0	2	2	2	0	0	0	0	0	1	2	1	0	0	0	0	0	0	0	0	2	0	0	0	0	2	0	1	0	0	0	0	0	0	2	0	2	0	0
	kameyama13	XY	XY	2	0	0	0	1	0	0	0	0	1	0	0	0	0	0	0	0	0	1	0	0	0	0	0	0	0	0	2	0	0	2	0	2	0	0	0	0	0	0	0	0	1	0	1	1	0
	kameyama14	XY	XY	1	0	0	0	1	0	0	0	2	2	0	0	0	0	0	0	2	0	1	0	0	0	0	0	2	0	0	0	0	2	2	0	1	0	2	0	0	0	2	1	0	2	0	1	0	0
	kameyama2	XY	XX	1	0	0	0	1	0	0	0	1	2	0	0	0	0	0	0	0	0	1	0	0	0	0	0	2	2	0	0	0	0	2	0	0	0	1	0	0	0	0	0	2	1	0	1	2	0
	kameyama5	XY	XX	1	0	0	0	1	0	0	0	2	2	2	0	0	0	0	0	0	1	1	0	0	0	0	0	0	0	0	0	0	0	0	1	0	0	1	0	0	0	0	2	0	2	0	1	0	0
	kameyama6	XY	XX	2	0	0	0	1	0	0	0	0	0	0	0	0	0	0	0	0	0	1	0	0	0	0	0	0	2	0	0	0	0	0	2	0	0	2	0	0	0	0	0	1	1	0	1	2	0
	kameyama7	XY	XX	2	0	0	0	1	0	2	0	0	2	2	0	0	0	0	1	0	0	1	0	0	0	0	0	0	0	0	0	0	0	1	2	2	0	0	2	0	0	0	2	0	1	0	1	2	0
	kameyama8	XY	XX	2	0	0	0	1	0	0	0	1	2	0	0	0	0	0	2	0	0	1	0	0	0	0	0	2	0	0	0	0	0	2	1	2	0	1	0	0	0	0	0	2	2	0	2	0	2
	sekigahara1	XY	XY	0	0	0	0	1	0	0	0	0	0	2	0	0	0	0	0	0	0	1	0	0	0	0	0	2	2	0	0	0	1	0	1	0	2	1	0	0	0	0	0	2	1	0	1	0	0
	sekigahara10	XY	XY	2	0	0	0	1	2	0	0	0	2	0	0	0	0	0	0	0	0	1	0	0	0	0	0	2	0	2	0	0	2	1	2	1	0	0	0	0	0	0	0	0	2	0	1	0	0
	sekigahara2	XY	XY	1	0	0	0	1	2	0	0	0	2	1	0	0	0	0	0	0	0	1	0	0	0	2	0	0	0	0	0	0	1	0	1	2	0	1	0	0	0	0	0	2	0	0	2	0	0
	sekigahara3	XY	XX	2	0	0	0	1	0	0	0	0	2	2	0	0	0	0	0	0	0	1	0	0	0	2	0	0	0	2	0	0	1	0	1	2	0	1	0	0	0	0	0	2	2	0	2	0	0
	sekigahara4	XY	XX	1	0	0	0	1	0	0	0	0	0	0	0	0	0	2	1	0	0	1	0	0	0	0	0	0	0	0	0	0	1	2	0	1	0	2	0	0	0	0	0	2	1	0	2	0	0
	sekigahara5	XY	XX	1	0	0	0	1	0	0	0	0	2	2	0	0	0	0	0	0	0	1	0	0	0	0	0	0	0	0	0	0	2	1	1	2	2	0	0	0	0	0	0	2	1	0	2	0	0
	osaka1	Neo-ZW1	ZZ	1	0	1	0	0	0	2	0	0	1	0	0	1	0	1	0	0	0	0	1	0	0	0	0	0	2	2	1	2	0	2	1	0	0	0	2	0	0	0	0	0	0	0	1	0	0
	osaka6	Neo-ZW1	ZZ	1	0	1	0	2	0	1	0	0	2	0	0	1	0	1	0	0	0	0	2	0	0	0	0	0	1	1	0	1	0	0	1	2	0	0	1	0	0	0	0	0	0	0	0	0	2
	osaka9	Neo-ZW1	ZZ	1	2	1	0	1	0	2	0	0	1	0	0	1	0	1	0	0	0	0	2	0	0	0	0	0	1	1	1	2	0	2	1	0	1	0	1	0	0	0	0	0	0	1	0	0	0
	osaka10	Neo-ZW1	ZZ	1	0	0	0	1	0	2	0	0	1	0	0	2	0	1	0	0	0	0	2	0	0	0	0	0	1	1	2	1	0	0	1	0	1	0	1	0	0	0	0	0	0	0	0	2	1
	osaka11	Neo-ZW1	ZZ	1	2	2	0	1	0	0	0	0	1	0	0	2	0	1	0	0	0	0	2	0	0	0	0	0	0	1	2	1	0	0	1	0	0	0	1	0	0	0	0	0	0	0	0	0	0
	osaka2	Neo-ZW1	ZW	1	2	1	0	0	0	0	0	0	1	0	0	0	0	1	0	0	0	0	0	0	0	0	0	0	2	1	2	2	0	0	1	0	2	0	1	0	0	0	0	0	0	0	2	0	1
	osaka4	Neo-ZW1	ZW	1	2	0	0	2	0	0	0	0	1	2	0	2	0	1	0	0	0	0	2	0	0	0	0	0	2	0	0	2	0	2	1	0	0	0	1	0	0	0	0	0	0	0	0	0	2
	osaka5	Neo-ZW1	ZW	1	2	1	0	2	0	0	0	0	1	2	0	1	0	1	0	0	0	0	1	0	0	0	0	0	1	1	2	0	0	2	1	0	2	0	1	0	0	2	0	0	0	0	2	0	1
	osaka7	Neo-ZW1	ZW	1	0	1	0	0	0	1	0	0	2	0	0	2	0	1	0	0	0	0	2	0	0	0	0	0	2	1	0	0	0	0	1	2	2	0	1	0	0	0	0	0	0	0	0	0	1
	osaka8	Neo-ZW1	ZW	1	0	2	0	1	0	0	0	0	1	0	0	2	0	1	0	0	0	0	2	0	0	0	0	0	2	2	2	0	0	0	1	0	2	0	1	0	2	0	0	0	0	0	0	0	2
	kasiwabara3	Neo-ZW1	ZZ	1	0	2	0	1	0	0	0	0	1	0	0	1	0	1	0	0	0	0	1	0	0	0	2	0	1	2	1	0	0	2	1	0	2	0	1	0	0	0	0	0	0	0	0	0	1
	kasiwabara4	Neo-ZW1	ZZ	2	0	2	0	1	2	0	0	0	1	0	0	2	2	1	0	0	0	2	2	0	0	0	0	0	2	1	1	2	0	0	1	0	0	0	1	0	0	0	0	0	0	0	0	0	1
	kasiwabara5	Neo-ZW1	ZZ	1	0	0	0	2	0	2	0	0	2	0	0	1	0	1	0	0	0	0	1	0	0	2	0	0	0	1	2	2	2	0	1	0	0	0	1	0	0	2	0	0	0	1	0	0	2
	kasiwabara7	Neo-ZW1	ZZ	2	2	0	0	1	2	2	0	0	2	0	0	2	0	1	0	0	0	0	2	0	0	2	0	0	2	1	1	2	0	0	1	0	0	0	1	0	0	0	0	0	0	2	0	0	0
	kasiwabara10	Neo-ZW1	ZW	1	0	2	0	0	0	0	0	0	2	0	0	2	0	1	0	0	0	0	2	0	0	0	0	0	1	0	1	2	0	0	1	2	2	0	1	0	0	0	0	0	0	0	0	0	2
	kasiwabara12	Neo-ZW1	ZW	1	2	0	0	0	0	0	0	0	2	0	0	2	0	1	0	0	0	0	2	0	0	2	0	0	2	1	2	2	0	0	1	0	0	0	1	0	0	0	0	0	0	0	0	0	1
	kasiwabara2	Neo-ZW1	ZW	1	0	0	0	1	0	1	0	0	1	0	0	1	0	1	0	0	0	0	1	0	0	0	0	0	0	1	2	2	0	0	1	0	0	0	1	0	0	2	0	0	0	2	0	0	2
	kasiwabara6	Neo-ZW1	ZW	1	0	2	0	2	0	2	0	0	2	0	0	1	0	1	0	2	0	0	1	0	0	0	0	0	0	2	2	1	0	0	1	0	0	0	1	0	0	0	0	0	0	2	0	0	0
	kinomoto4	Neo-ZW2	ZZ	1	0	0	0	1	0	0	0	0	1	2	0	0	0	1	2	2	0	1	0	0	0	2	0	0	2	2	1	0	0	0	1	0	0	0	0	0	0	0	0	0	0	0	2	0	0
	kinomoto5	Neo-ZW2	ZZ	1	0	0	0	1	0	0	0	0	2	2	0	0	0	1	0	0	0	2	0	0	2	0	0	0	0	0	0	0	1	2	1	0	2	0	0	0	0	0	0	0	2	0	1	0	0
	kinomoto6	Neo-ZW2	ZZ	1	0	0	0	1	0	0	2	0	2	0	0	0	0	1	0	0	0	2	0	0	0	0	0	0	0	1	0	0	0	2	2	0	0	0	0	0	0	0	0	0	1	0	2	0	0
	kinomoto7	Neo-ZW2	ZZ	1	0	0	0	1	0	0	0	0	2	0	0	0	0	1	0	0	0	2	0	0	0	0	0	0	2	0	2	0	0	0	1	0	0	0	0	0	0	0	0	0	0	0	1	0	0
	kinomoto11	Neo-ZW2	ZW	2	0	0	0	1	1	0	0	0	2	0	0	0	0	1	2	0	0	0	0	0	0	0	0	0	0	2	1	0	0	2	1	0	0	0	1	0	0	0	0	0	0	0	0	0	0
	kinomoto3	Neo-ZW2	ZW	1	0	0	0	1	2	0	0	0	1	0	0	0	0	1	0	0	0	2	0	0	0	0	0	0	0	0	2	0	0	0	1	0	2	0	2	0	0	0	0	0	0	0	2	0	0
	kinomoto8	Neo-ZW2	ZW	1	0	0	0	1	0	0	0	0	1	2	0	0	0	1	0	0	0	0	0	0	0	0	0	0	0	2	1	0	0	1	1	0	2	0	2	0	0	0	0	0	0	0	1	0	0
	kinomoto9	Neo-ZW2	ZW	1	0	0	0	1	0	0	0	0	1	0	0	0	0	1	2	2	0	2	0	0	0	0	0	0	2	0	2	0	0	0	1	0	0	0	0	0	0	0	0	0	0	0	1	0	0
	kyoto4	Neo-ZW2	ZZ	1	0	0	0	1	0	2	0	0	1	0	0	0	0	1	0	0	0	0	0	0	1	0	0	0	2	2	0	0	0	0	1	2	2	0	2	0	0	0	0	0	0	0	0	0	0
	kyoto6	Neo-ZW2	ZZ	1	0	2	2	1	0	2	0	0	1	0	0	0	0	1	0	2	2	0	0	0	0	0	0	0	0	0	2	0	0	0	1	0	2	0	1	0	0	0	0	0	0	0	0	0	0
	kyoto1	Neo-ZW2	ZW	1	0	2	1	1	0	1	0	0	1	0	0	2	0	1	0	0	0	0	2	0	0	0	0	0	0	0	0	0	0	0	1	0	2	0	1	0	0	0	0	0	2	2	0	0	0
	kyoto2	Neo-ZW2	ZW	2	0	0	0	1	0	0	0	0	2	2	0	2	0	1	0	0	0	0	2	0	0	0	0	0	0	2	0	1	0	0	1	0	0	0	1	0	2	0	0	0	0	0	0	0	2
	kyoto5	Neo-ZW2	ZW	1	0	0	2	1	0	1	0	0	2	0	0	0	0	1	2	0	0	0	0	0	0	0	0	0	0	0	0	1	0	0	2	0	0	0	1	0	0	0	0	0	0	2	2	2	2
	yamagata1	ZW1	ZZ	1	0	0	0	1	0	0	0	0	0	1	0	0	1	2	0	0	0	1	1	0	0	0	0	0	1	0	1	0	0	0	1	0	0	0	0	0	2	0	0	0	0	0	2	0	1
	yamagata3	ZW1	ZZ	1	0	0	0	1	0	0	0	0	0	1	0	0	1	1	0	0	0	1	1	0	0	0	0	0	1	0	1	0	0	0	1	0	0	0	0	0	0	0	0	0	0	0	0	0	1
	yamagata4	ZW1	ZZ	1	0	0	0	1	0	0	0	0	0	1	0	0	1	1	0	0	0	1	1	0	0	0	0	0	1	0	1	0	0	0	1	0	0	0	0	0	0	0	0	0	0	0	2	0	1
	yamagata6	ZW1	ZW	1	0	0	0	1	0	0	0	0	0	1	0	0	1	1	0	0	0	1	1	0	0	0	0	0	0	0	1	0	0	0	1	0	0	0	0	0	0	0	0	0	0	0	2	0	1
	yamagata7	ZW1	ZW	1	0	0	0	1	0	0	0	0	0	1	0	0	1	1	0	0	0	1	1	0	0	0	0	0	1	0	1	0	0	0	1	0	0	0	0	0	0	0	0	0	0	0	2	0	0
	yamagata9	ZW1	ZW	1	0	0	0	1	0	0	0	0	0	1	0	0	1	1	0	0	0	1	1	0	0	0	0	0	1	0	1	0	0	0	1	0	0	0	0	2	0	0	0	0	0	0	1	0	1
	kurobe2	ZW2	ZZ	1	0	0	0	1	0	0	0	0	0	0	0	0	0	1	0	0	0	1	1	0	0	0	2	0	2	0	1	0	0	0	1	2	0	0	0	0	0	0	0	0	0	0	1	0	2
	kurobe4	ZW2	ZZ	1	0	0	0	1	0	2	0	0	0	0	0	0	0	1	0	0	0	1	1	0	0	0	2	0	0	0	1	0	0	0	0	0	0	0	0	0	0	0	0	0	0	0	0	0	2
	kurobe6	ZW2	ZZ	1	0	0	0	1	0	2	0	0	0	0	0	0	0	1	0	0	0	1	1	0	0	0	0	0	0	0	1	0	0	0	2	0	0	0	0	0	0	0	0	0	0	0	1	0	1
	kurobe1	ZW2	ZW	1	0	0	0	1	0	2	0	0	0	0	0	0	0	1	0	0	0	1	1	0	0	0	1	0	2	0	1	0	0	0	2	0	0	0	0	0	0	0	0	0	0	0	2	0	1
	kurobe3	ZW2	ZW	1	0	0	0	1	0	0	0	0	2	2	0	0	0	1	0	0	0	1	1	0	0	0	0	0	0	0	1	0	0	0	1	0	0	0	0	0	0	0	0	0	0	0	1	0	0
	kurobe5	ZW2	ZW	1	0	0	0	1	0	2	0	0	0	0	0	0	2	1	0	0	0	1	1	0	0	0	0	0	1	0	1	0	0	0	0	0	0	0	0	0	0	0	0	0	0	0	0	0	2
	tomiki3	ZW3a	ZZ	1	0	0	0	1	0	1	0	0	0	0	0	0	0	1	0	0	0	1	1	0	0	0	0	0	0	0	1	0	0	0	1	2	0	0	0	0	0	0	0	0	0	0	1	0	0
	tomiki1	ZW3a	ZW	1	0	0	0	1	0	2	0	0	0	0	0	0	0	1	0	0	0	1	1	0	0	0	0	0	0	0	1	0	0	0	1	0	0	0	0	0	0	0	0	0	0	0	1	0	0
	yamanaka3	ZW3a	ZZ	1	0	0	0	1	0	2	0	0	2	0	1	0	0	1	0	0	0	2	1	0	0	0	0	0	0	0	1	0	0	0	1	0	0	0	0	0	0	0	0	0	0	0	2	0	0
	yamanaka1	ZW3a	ZW	1	0	0	0	1	0	0	0	0	0	0	2	0	0	1	0	0	0	1	1	0	0	0	0	0	0	0	1	0	0	0	1	0	0	0	0	0	0	0	0	0	0	0	2	0	1
	yamanaka2	ZW3a	ZW	1	0	0	0	1	0	0	0	0	0	0	0	0	0	1	0	0	0	1	2	0	0	0	0	0	0	0	1	0	0	0	1	0	0	0	0	0	0	0	0	0	0	0	1	0	0
	awara1	ZW3a	ZZ	1	0	0	0	1	0	1	0	0	1	2	0	0	0	1	0	0	0	2	1	0	0	0	0	0	0	0	1	0	2	0	1	0	0	0	0	0	0	0	0	0	0	0	0	0	0
	awara6	ZW3a	ZZ	1	0	0	0	1	0	2	0	0	2	0	0	0	0	1	0	0	0	1	1	0	0	0	0	0	0	0	1	0	0	0	0	0	0	0	0	0	0	0	0	0	0	0	1	0	0
	awara9	ZW3a	ZZ	2	0	0	0	1	0	0	0	0	1	2	0	0	0	1	0	0	0	2	1	0	0	0	0	0	0	0	1	0	0	0	1	0	0	0	0	0	0	0	0	0	0	0	2	0	0
	awara2	ZW3a	ZW	2	0	0	0	1	0	0	0	0	1	0	0	0	0	1	0	0	0	1	1	0	0	0	0	0	0	0	1	0	1	0	1	2	0	0	0	0	0	0	0	0	0	0	2	0	0
	awara3	ZW3a	ZW	1	0	0	0	1	0	0	0	0	1	0	0	0	0	1	0	0	0	1	1	0	0	0	0	0	0	0	1	0	0	0	2	0	0	0	0	0	0	0	0	0	0	0	1	0	0
	awara7	ZW3a	ZW	0	0	0	0	1	0	0	0	0	1	1	0	0	0	1	0	0	0	1	1	0	0	0	0	0	0	0	1	0	0	0	1	0	0	0	0	0	0	0	0	0	0	2	2	0	0
	mikata1	ZW3b	ZZ	1	0	0	0	1	0	2	0	0	0	2	0	1	0	1	0	0	0	0	1	0	0	0	0	0	0	2	1	0	0	0	1	0	0	0	2	0	0	0	0	0	0	0	0	0	0
	mikata2	ZW3b	ZZ	1	0	0	0	1	0	0	0	0	0	0	0	1	0	1	0	0	0	0	1	0	0	0	0	0	0	0	1	0	0	0	1	0	2	0	2	0	0	0	0	0	0	0	2	0	0
	mikata3	ZW3b	ZW	1	0	0	0	1	2	2	0	0	1	0	0	2	0	1	0	0	0	0	2	0	0	0	0	0	0	0	1	0	0	0	1	0	0	0	1	0	0	0	0	0	0	0	2	0	0
	mikata4	ZW3b	ZW	1	0	0	0	1	0	0	0	0	1	0	0	1	0	1	0	0	0	0	1	2	0	0	0	0	0	2	1	0	0	0	1	0	0	0	0	0	0	0	0	0	2	0	2	0	0
	mikata5	ZW3b	ZW	1	0	0	0	1	0	2	0	0	1	0	0	1	0	1	0	0	0	0	1	0	0	0	0	0	0	1	1	0	0	0	1	0	0	0	1	0	0	0	0	0	0	0	0	0	0
	mikata6	ZW3b	ZW	1	0	0	0	1	2	1	0	0	0	0	0	2	0	1	0	0	0	0	2	0	0	2	0	2	0	1	1	0	0	0	1	0	0	0	1	0	0	0	0	0	0	0	2	0	0
[truncated: 1,580 more columns]

## Sheet: Table S2
	Table S2. Sequences of the autosomal genetic markers (1626 SNPs)
	SNP No.	CloneID	SNP	Sequence
	1	11010555	27:G>A	TGCAGCTTTTAATGCACACTGTGAGAAGTTCACAGCATGAGATCGGAAGAGCGGTTCAGCAGGAATGCC
	2	11016329	32:T>C	TGCAGAAATAATTAGAAGTAAGTGCCGTTGTGTACAATGCCTTCTGGACTAGGCTGAAGGTGAAGGAGA
	3	11016330	55:G>T	TGCAGAAATATTACAGAAGACTACAGACATACCAGAGAAGTTGGGCAGACACTGTGAGCATGAGATCGG
	4	11016368	52:G>T	TGCAGAATGTGCATGTGCAGTTTGGTTTACATTTCTGGCACAGTGCCTGTGTGTCGGGGTGACCAAACT
	5	11016384	34:C>T	TGCAGACAAGGTTGTAAAGGAGTCCAAAATAGCCCGTTTCGGGGAATCTGCAATAACATGGGATTTCAT
	6	11016391	63:A>C	TGCAGACACATTCAGTTCTATGGGAATTGTAGAGGGGAATTTATCAAAACTGGAGGAGCCAGAATCTGG
	7	11016408	18:G>A	TGCAGACATGATACAAGAGATTAATGCATCAAATGCAGCTTATCAGTGCCCACCAATTGCAGCATGAGA
	8	11016424	29:C>T	TGCAGACCGTGAACCTATAAAGCTGGCAGCCCAATGTGGCGGCTGTTAATTTGTTTCATAGCATGAGAT
	9	11016445	60:C>T	TGCAGAGAACTACCAGAGTTAAGATTCATCCAATAACTTGGTCGGACCATGCACCTGTCTCCATGTCCA
	10	11016459	8:A>G	TGCAGAGCATAGCTCTGATACGGCTGTGACAGGTGAAAGAGCGCAGATCACACAGCAAGCATGAGATCG
	11	11016529	13:G>C	TGCAGATGATATCGCTTTGACTTCTCACAAGGGTTATGTGGATCAGTTGAGGAAGCACTTGAAACAATC
	12	11016531	67:T>G	TGCAGATGATTAGGTTGCCATAATTGTTAGATGTACCAGGAAACAAATCATGGCTGCTGAGCTTCTCTC
	13	11016566	52:G>T	TGCAGATTGACAGGAGTTAGGGCCTCTGCCTCCAAATTACCACACTAATGGTGGACAGGAACACAAAGC
	14	11016589	53:C>T	TGCAGCACACTCCTGTACAGTTTACAAGCGATTCAGTGTGGTGCAATATAAGCCCATTCATTTTGACTG
	15	11016607	6:A>G	TGCAGCAGGCACCCAATAATGAAGAAAGAGTCCCGCCGCACTGGGGAAAGTTTCTTCATGTTTTAGCAT
	16	11016608	8:G>A	TGCAGCAGGGAGATGCTTCGTCAACTCTAACTTGGGAAAGGGCCCAAGTGACACTCCACCAAGTGAACA
	17	11016678	15:G>T	TGCAGCCTTGAAAAGGCTCTGGCATTCAACACTTCCGGGAGTGTCAGATGCCTGTGTTGCTCTCTGCAT
	18	11016700	47:G>A	TGCAGCGTTGCTGTGTCCAGCCTCATCTTCGCATTTGCAGGTCTGCCGGAGTGCGGTGTGATGTGGGGA
	19	11016740	44:C>A	TGCAGCTCTGCATAAAAGCCAATCAGCTTCCAGGTTTTATTGTCCGCTTCATTGAACAAGCTGAAGTTA
	20	11016772	63:A>T	TGCAGCTTAAGTCTAGTATATCTGCCATCCTGAGACCTTTAATCATGTAAGCACCACTCTGTCATGGTT
	21	11016846	39:G>A	TGCAGGCACTGGATTGCACTTTAACAATGCATCACAGCAGGTACGTACAGCACACACTAGCATGAGATC
	22	11016863	6:C>T	TGCAGGCCTAAAGAGCCAAGGCTGTACAATCATGGCAAATTGTCTGCAAAGAGATATGCATGAGATCGG
	23	11016917	30:A>T	TGCAGGTACTAACAATGAATGGGACCACAAAGCTGAACACAGAAGGGAATCCATCTTTGCATGAGATCG
	24	11016918	52:G>A	TGCAGGTACTTACAATGATGCCAGCGGTCCAGGGATTGAGCAGGAGGATGGCGCACACCAGGAAGGTGC
	25	11016919	28:G>T	TGCAGGTAGATCCAACACCATATTATGAGATTTGCACATATGACACATGCACTTGTGAGTCGATTGGGG
	26	11016950	36:C>A	TGCAGGTGCATCGCAGCTTCCAAAGCATACAAGACACCAGCCAGCCAGAAGGCTTATGCTTACAGCATG
	27	11017003	39:T>A	TGCAGTAATGCAGTCTGGAGAGCCAAATAGTGGGGCTGGTCAGACACTGCACAGCCTCCAGCTGAAAAC
	28	11017087	54:G>T	TGCAGTATGGTTGGGAGGTCATGAATGGTTAAGGTGGTTGTAAAGGCTCAAGGTGTTTTACCTTCATGC
	29	11017118	23:C>T	TGCAGTCACACTTGAAGACCGTCCGCCTTTCCTGGGCTCTTGATTTTTGAGAGCATGAGCATGAGATCG
	30	11017130	29:C>T	TGCAGTCAGCAGTGGGACAGAACTTGCTACGGGAACGTTCACCTTCTTCTTGCCATGTAACAGCATGAG
	31	11017140	21:C>T	TGCAGTCATCCAGCTATTTAGCGTGGGCGAAGTGGGCTGCTTCCATCTAAGAAGAAGCTCCCTGCATGA
	32	11017143	65:G>C	TGCAGTCATTCAATCATATTGTACAATGCCACTTTAAGACTACAAATCCCAGCATCCTCAGGTGTGTGC
	33	11017229	52:A>T	TGCAGTCTGTGTTGATCTGGATACACCTGTGTGGGAGAAGACAGGCTTTAATATTCAGAATTCAGTAAT
	34	11017230	44:G>A	TGCAGTCTTAAGCCTCGTACACATGATCAGATTTTCGGATGACCGTCCAGTTTTTTGTTGCATGAGATC
	35	11017263	34:G>A	TGCAGTGATTGGCTAAAGGCTCTCACAGCAGGCCGCCCGCTGATTGGCCAAAGCATGGTCATGTGCATG
	36	11017271	7:T>C	TGCAGTGTACACTCATCGTCTCCAATGCTCCTGACAACCTAGAGATACTTCTTCACAGCATCAAGTTAA
	37	11017300	18:C>T	TGCAGTGCGTTTTAAATACGGTGCAGAAAATGCACACAGAAACGCGGGTTACCTGCTCTGCATGAGATC
	38	11017302	19:C>T	TGCAGTGCTAGTGTATACACGGTTTACATGTCCCATTGACTTCTATTAAGTCGCACATTTTTCTGAAAG
	39	11017303	47:C>G	TGCAGTGCTCCCTTATGACACAGCACACACAGCTCCAATCTAACACCCCACCTCACCTCAGAGTTTTGA
	40	11017338	58:C>T	TGCAGTGGAGATGCTCTCTATGACCTATATACAGAAACAGATGAAAACACAGCAAGAGCGCATGAGATC
	41	11017347	28:T>A	TGCAGTGGCCATCTCAGTCTCAGTCTCCTGACCTCAATATCATTGAACGACTCTGGGGATATCTCAAGC
	42	11017366	43:A>G	TGCAGTGTAATGCTGCATCTCTCGGAGGCCCCGTCCCCTTGTGACGTCACCATCTGGTGCATGAGATCG
	43	11017373	63:C>T	TGCAGTGTCAGTCTCCCAGGTTTGTACTTTGTATTCAGGTGCTGAAAGAAATAGAGCACTTCTCGCTCC
	44	11017375	17:C>T	TGCAGTGTCCTCACTTGCTAATGTAGTACAACACCAGGATTAGCCTTACATCATGTAGAGAGCAAAATG
	45	11017377	23:G>A	TGCAGTGTGAAAGTGGTCTTAGTGTAGTGCACCTATAGTAGCCCCATTCCTATAAGCCAAGCATGAGAT
	46	11017456	20:G>A	TGCAGTTCACCTCCAATGTTGTGTTACATACCGAGTGCTCTGTGACATTGCCTCGTTGATGGCTTTGTT
	47	11017487	40:T>C	TGCAGTTGACGTACCTGGTCATGTTGAAGTATGACTGGCGTGTCCTCTTTGCCACAGAGGGAGGAGTGA
	48	11017506	15:T>G	TGCAGTTGCCATGTTTTTGCACATGTGATCAGTTATGACACCAGATATTTTGATGGATTGGCAGTTTGG
	49	11017512	22:A>G	TGCAGTTGCTGGGCTCCTTTTGAAAATGCTAGCTTGCCTGGCTGTGTCCTGGTGCAAATTTTCTGAATG
	50	11017519	66:T>C	TGCAGTTGTAATGATGCTGCAAATGATAAGTTATGACATCAGCCACTTGATGGCTTGCCAGTTTGCTTG
	51	11017526	24:C>A	TGCAGTTGTGTAGGTCAATACCCACCCCCATCACTGAACTGACTGATGAGGTCATGCCTGCTCTGTCCT
	52	11018383	27:G>T	TGCAGAAAAATCTGGCTTGATCAGGTAGGCCACTTGTTGCATGAGATCGGAAGAGCGGTTCAGCAGGAA
	53	11018437	5:A>G	TGCAGAAATTGTCAATGGACTACAAGTGCAATTATCAGCATGAGATCGGAAGAGCGGTTCAGCAGGAAT
	54	11018496	19:T>C	TGCAGAAGCATTGTGCTGTTTGAAAATTGTAGCATGAGATCGGAAGAGCGGTTCAGCAGGAATGCCGAG
	55	11018517	20:C>T	TGCAGAAGTGTGGAATTGGACTGCTGGGATGGGGATGATGGCATGAGATCGGAAGAGCGGTTCAGCAGG
	56	11018533	15:C>T	TGCAGAATATGTTGTCGGTGATGCACCATATAGCATGAGATCGGAAGAGCGGTTCAGCAGGAATGCCGA
	57	11018572	16:G>A	TGCAGACAAAGATCAGGCAAATTAACTTGTGGCATGAGATCGGAAGAGCGGTTCAGCAGGAATGCCGAG
	58	11018692	7:C>T	TGCAGACCTGGGCCAAGCTCATGAGACCAATGTAAGAGCCTTCTGTAATGAAGCATGAGATCGGAAGAG
	59	11018904	21:C>T	TGCAGAGTACACTTGTGCTGACGGGCTAGAGTATAACGCTGTGATTGCATTCAGCATGAGATCGGAAGA
	60	11018907	22:G>T	TGCAGAGTAGTGGCCATAGACTGGTCACTGCTGTGCATGAGATCGGAAGAGCGGTTCAGCAGGAATGCC
	61	11018974	30:A>C	TGCAGATAGACCACTGCTTCCACACAGAGAACAATAGCATGAGATCGGAAGAGCGGTTCAGCAGGAATG
	62	11018979	8:G>A	TGCAGATAGCAAGTCCAGTGGACTTTTTGCATGAGATCGGAAGAGCGGTTCAGCAGGAATGCCGAGACC
	63	11018980	7:A>C	TGCAGATAGCAGGTGCAATGCTTTGCATGAGATCGGAAGAGCGGTTCAGCAGGAATGCCGAGACCGATC
	64	11018999	21:G>T	TGCAGATATGTAACAGGAGATGGTCAAAGACTTCCAGCATGAGATCGGAAGAGCGGTTCAGCAGGAATG
	65	11019014	14:C>T	TGCAGATCACAAATCACAGCAGAATCGGCATGAGATCGGAAGAGCGGTTCAGCAGGAATGCCGAGACCG
	66	11019015	11:C>T	TGCAGATCACACACAGCTTTTAAGCATGAGATCGGAAGAGCGGTTCAGCAGGAATGCCGAGACCGATCT
	67	11019029	7:A>C	TGCAGATAATTTCTGAAATTCAATTTGCAGCATGAGATCGGAAGAGCGGTTCAGCAGGAATGCCGAGAC
	68	11019069	17:G>A	TGCAGATGACATTAGGCGGCACCTGTATTATTTCAACTGACGAATGCATGAGATCGGAAGAGCGGTTCA
	69	11019079	16:G>A	TGCAGATGATGCCTATGGGATATGTGGCATGAGATCGGAAGAGCGGTTCAGCAGGAATGCCGAGACCGA
	70	11019082	14:C>T	TGCAGATGATTTTTCAGAGGCTTGGCAATGACAGCATGAGATCGGAAGAGCGGTTCAGCAGGAATGCCG
	71	11019088	45:T>A	TGCAGATGCCATTGAAGCCTGAATACAATAGTCTACGGTGGAGACTCCTTCATGCATGAGATCGGAAGA
	72	11019096	7:G>A	TGCAGATGGATTCTCTAGCATATCATCTGTTAGCTGCATGAGATCGGAAGAGCGGTTCAGCAGGAATGC
	73	11019125	17:G>A	TGCAGATGTTATTGCCAGTCACTGGTAACTGCCATTCTGTTTATGGCATGAGATCGGAAGAGCGGTTCA
	74	11019134	8:A>G	TGCAGATTACACAGCTAAAGTCAGCACTACTCAAGGAGCATGAGATCGGAAGAGCGGTTCAGCAGGAAT
	75	11019148	8:C>T	TGCAGATTCCCTTCCTGAGTCTAGAAGCATGAGATCGGAAGAGCGGTTCAGCAGGAATGCCGAGACCGA
	76	11019174	38:A>G	TGCAGATTTCACTTGCTAATTTAGGAGTGAAAAGTGATAGGACTTTTTACCTAGCATGAGATCGGAAGA
	77	11019181	37:A>G	TGCAGATTTGGGACACAGCGGGTCAGGAGCGGTTTCGAAGTGTCACGCATGAGATCGGAAGAGCGGTTC
	78	11019182	29:C>A	TGCAGATTTGGTACTGAAAGACCCCCATTCATTTTCTTAGCATGAGATCGGAAGAGCGGTTCAGCAGGA
	79	11019248	19:G>A	TGCAGCAATTCACAATGCAGGGAAGATGAGAATTCATGGCTTAGTATAAGCATGAGATCGGAAGAGCGG
	80	11019350	11:T>A	TGCAGCAGTCTTTATTGGCCAGCACAGGATGATGTCACTCTTATGCATGAGATCGGAAGAGCGGTTCAG
	81	11019371	8:A>G	TGCAGCATATCACACAGGGTAAATCGACCAGTCCTTTTAGTTCCACATGCATGAGATCGGAAGAGCGGT
	82	11019405	28:A>G	TGCAGCATGTCTCAAAGCAAATGCTCTTAGCATGAGATCGGAAGAGCGGTTCAGCAGGAATGCCGAGAC
	83	11019417	51:T>G	TGCAGCATTCCCCTTTATGTCATATGGCATTGTACAACATGCGATGACACTTTACGGCATGAGATCGGA
	84	11019512	21:G>T	TGCAGCCCAGCATTTCAACCAGATTTCTTTGCATGAGATCGGAAGAGCGGTTCAGCAGGAATGCCGAGA
	85	11019531	42:A>G	TGCAGCCCTTAAAGGCTGTTTATCAATGTCCTTGTTCTCAGAACAGCATGAGATCGGAAGAGCGGTTCA
	86	11019713	10:A>T	TGCAGCTAGAAATATGCAGTGCTAGAAATACCCCATGCATGAGATCGGAAGAGCGGTTCAGCAGGAATG
	87	11019717	37:T>C	TGCAGCTAGAGGACCATGCAGGGTACAAAATGTGCAATAGCATGAGATCGGAAGAGCGGTTCAGCAGGA
	88	11019766	21:G>A	TGCAGCTCCAATAGCTCCTACGTTAATCCAGCCCTGGGCACTACAAGTCTCAGCATGAGATCGGAAGAG
	89	11019774	10:G>A	TGCAGCTCCGGGAAGATACTGATTCTGTGGTGAGTAGAAGGCTGCATGAGATCGGAAGAGCGGTTCAGC
	90	11019779	11:G>T	TGCAGCTCCTGGTCTCTGTGCTGCTGCCACCGGCTCCATGCATGAGATCGGAAGAGCGGTTCAGCAGGA
	91	11019829	24:G>A	TGCAGCTGATGAAGGCGGAGCGGCGCTGAGCATGAGATCGGAAGAGCGGTTCAGCAGGAATGCCGAGAC
	92	11019838	15:C>T	TGCAGCTGCCATATGCTGGCAACATAAGCATGAGATCGGAAGAGCGGTTCAGCAGGAATGCCGAGACCG
	93	11019841	8:C>T	TGCAGCTGCGGCTTGAGTGAATGCATGAGATCGGAAGAGCGGTTCAGCAGGAATGCCGAGACCGATCTC
	94	11019851	9:T>C	TGCAGCTGCTGTTCCATAAGTGGTCTTCCCTGCAATCTTGCATGAGATCGGAAGAGCGGTTCAGCAGGA
	95	11019880	12:A>G	TGCAGCTGTGAAACCATCCAGCATGAGATCGGAAGAGCGGTTCAGCAGGAATGCCGAGACCGATCTCGT
	96	11019905	9:C>A	TGCAGCTTCCAGGAGGGACTATTGAGGTCCCGGCAATAATTAATTCAGGAGCATGAGATCGGAAGAGCG
	97	11019948	20:G>T	TGCAGCTTTCCTGTGGGTTTGCTCTACTTAGCCATAGACTTCTATCCTGCATGAGATCGGAAGAGCGGT
	98	11019986	6:T>A	TGCAGGTACACTACAGGAGATGGTAAAAGACTGTAGGCATGAGATCGGAAGAGCGGTTCAGCAGGAATG
	99	11020000	21:T>A	TGCAGGAAGTGTCAATGGACTTCGACAGTGCTGATCAGCATGAGATCGGAAGAGCGGTTCAGCAGGAAT
	100	11020051	28:C>T	TGCAGGAGACTCACTTTCCTGGACGCTACAATCCATCCTTCCTGCATGAGATCGGAAGAGCGGTTCAGC
	101	11020052	26:C>A	TGCAGGAGAGAAATTATATCTAAAGCCATTCTGATGTGATCTGATTCTTGGCATGAGATCGGAAGAGCG
	102	11020055	6:A>G	TGCAGGAGATCACCATGGTGTGAAAGAAGCCTTTAGAACTGTTCACACTACCAGCATGAGATCGGAAGA
	103	11020111	23:C>A	TGCAGGCAAAAAACTCTTCCCTTCAATCAGCATGAGATCGGAAGAGCGGTTCAGCAGGAATGCCGAGAC
	104	11020147	26:G>T	TGCAGGCACTCACCATCACACACACAGGTTTAAAGCATGAGATCGGAAGAGCGGTTCAGCAGGAATGCC
	105	11020246	13:T>C	TGCAGGCTCAATGTGCTTGCAGATCATTGCCACCAAAGTGTGCATGAGATCGGAAGAGCGGTTCAGCAG
	106	11020250	9:C>T	TGCAGGCTCCACCATTTGACAGTTCACTTACCCAGCATGAGATCGGAAGAGCGGTTCAGCAGGAATGCC
	107	11020251	6:C>T	TGCAGGCTCCCAGCGCAGTAGCTGGCGGGGAGCATGAGATCGGAAGAGCGGTTCAGCAGGAATGCCGAG
	108	11020271	8:G>A	TGCAGGCTGTTCAATGGTGTCTATGCATGAGATCGGAAGAGCGGTTCAGCAGGAATGCCGAGACCGATC
	109	11020273	14:A>T	TGCAGGCTTACAAGAGGGGGAGACCTTGCTGTGACCATCGCCAGCATGAGATCGGAAGAGCGGTTCAGC
	110	11020296	32:C>T	TGCAGGGAGAAAACCCAACAATTCTGGGAGTGCGCTGGGAGATCTAAGGCATGAGATCGGAAGAGCGGT
	111	11020339	41:G>A	TGCAGGGGGAAATCTCTGGAATATTTCAGCCAATCACTTGTGCTGACAAGAAGCATGAGATCGGAAGAG
	112	11020371	20:G>A	TGCAGGTAAGGAGGGGATTAGAATAATTCCCTTTAGCATACAATCATTCCAGCATGAGATCGGAAGAGC
	113	11020374	18:G>T	TGCAGGTAATAATCTAGAGATGCTACACCAGCAGTACAGGCATGAGATCGGAAGAGCGGTTCAGCAGGA
	114	11020379	19:T>C	TGCAGGTACAATCAACAGCTGACAGATGTATGAACATGCATGAGATCGGAAGAGCGGTTCAGCAGGAAT
	115	11020401	20:A>T	TGCAGGTATGCCTCAAATTCAGCTCATGCATGAGATCGGAAGAGCGGTTCAGCAGGAATGCCGAGACCG
	116	11020405	16:A>T	TGCAGGTATTTTGCAAATTCTATTGTGTGGATACCTGTTTTCTCCCTGCATGAGATCGGAAGAGCGGTT
	117	11020408	41:C>T	TGCAGGTCAAAATCAACAATTCCCATGAATCAATGAGAATGCAGTGACACTGTGTGCATGAGATCGGAA
	118	11020409	7:C>G	TGCAGGTCAACACACCACCCCTTGTGTTCTGCATGAGATCGGAAGAGCGGTTCAGCAGGAATGCCGAGA
	119	11020420	14:G>A	TGCAGGTCAGCAGGGCGGATGAAGGGGGATGAGGAGGGCATGAGATCGGAAGAGCGGTTCAGCAGGAAT
	120	11020454	47:C>T	TGCAGGTGATTACAGGAGGCTAATAAAAAGTCTAATTGAGATATTATCAGCATGAGATCGGAAGAGCGG
	121	11020498	34:A>T	TGCAGGTTAATGGCATAATACCGCAGATGATGTCATTCCTGCGCATGAGATCGGAAGAGCGGTTCAGCA
	122	11020502	37:G>A	TGCAGGTTAGCTGCACTGAGCCATAGACTTCTATTATGTCCTGCGGTTCTGCATGAGATCGGAAGAGCG
	123	11020518	11:T>G	TGCAGGTTCTTTAAAGGGCTAAAACACTGGGGAAATGTGCATGAGATCGGAAGAGCGGTTCAGCAGGAA
	124	11020555	26:G>T	TGCAGTAAACACATCTTAAACACAAAGGCATGAGATCGGAAGAGCGGTTCAGCAGGAATGCCGAGACCG
	125	11020571	21:A>C	TGCAGTAACAACAATAAAATCAGTCTCTATATGCAGTAAAGCATGAGATCGGAAGAGCGGTTCAGCAGG
	126	11020600	17:G>A	TGCAGTACACAATCTCTGCGGCTACTGCTGGCATGAGATCGGAAGAGCGGTTCAGCAGGAATGCCGAGA
	127	11020614	5:T>C	TGCAGTACATAATTGCAGCAAGCATATACCTTGTTAATGCATGAGATCGGAAGAGCGGTTCAGCAGGAA
	128	11020617	5:T>C	TGCAGTACATGTGCACATACATAGGGGATTACTGTGCATGAGATCGGAAGAGCGGTTCAGCAGGAATGC
	129	11020629	12:C>A	TGCAGTACCATGCGATTTGTTGTGGTGCATTTTTGAAAAGTAGTGCATGAGATCGGAAGAGCGGTTCAG
	130	11020635	21:T>G	TGCAGTACCTCCTTTCACTTGTGGCCTTCCCTGTGACCTGAGTGCATGAGATCGGAAGAGCGGTTCAGC
	131	11020658	14:G>A	TGCAGTAGACTGTTGGGTCTGGTGAGCATGAGATCGGAAGAGCGGTTCAGCAGGAATGCCGAGACCGAT
	132	11020674	29:G>A	TGCAGTAGCATTCTCCAGGCGTGCAAGCTGTAATCTTTGAATGGAGCATGAGATCGGAAGAGCGGTTCA
	133	11020695	23:C>T	TGCAGTAGTGATGTGCCAGCCATCGGGTGGAACCACAGCATGAGATCGGAAGAGCGGTTCAGCAGGAAT
	134	11020698	15:T>G	TGCAGTAGTGGGCTCTAATACTATGGGGTGTTGAAATTGGCTCTTGAAAGCATGAGATCGGAAGAGCGG
	135	11020705	12:G>A	TGCAGTATAATGGATGACTGTAGTAACCTGCAAGAGACCAGCATGAGATCGGAAGAGCGGTTCAGCAGG
	136	11020710	34:C>A	TGCAGTATAGGGACTATATCCCGAGGCGCAGTGGCCTCTGGCATGAGATCGGAAGAGCGGTTCAGCAGG
	137	11020767	9:T>C	TGCAGTATTTTGTTCTAGAGAATGGCAGCATGAGATCGGAAGAGCGGTTCAGCAGGAATGCCGAGACCG
	138	11020797	7:A>G	TGCAGTCAGAGAGAGTCCTATTAGCATGAGATCGGAAGAGCGGTTCAGCAGGAATGCCGAGACCGATCT
	139	11020846	7:A>G	TGCAGTCATTGTGTGACTTGCAGGCATGAGATCGGAAGAGCGGTTCAGCAGGAATGCCGAGACCGATCT
	140	11020851	36:G>A	TGCAGTCCAACTTTTTAGAGAGTGCGAAGTTTAAGTGATGCATGAGATCGGAAGAGCGGTTCAGCAGGA
	141	11020874	14:C>T	TGCAGTCCTAGTGGCCATAATACTACACAATATACGGGACAAGCATGAGATCGGAAGAGCGGTTCAGCA
	142	11020971	27:G>T	TGCAGTCTTGGAAGGGAAGTCTGTGTGGGGCTTAATGGGCTGCATGAGATCGGAAGAGCGGTTCAGCAG
	143	11020994	30:G>T	TGCAGTGAAGCTGTTCCCTACTGCATATGTGTGAAGCATGAGATCGGAAGAGCGGTTCAGCAGGAATGC
	144	11021006	17:T>G	TGCAGTGAATTCCAGGATATTCAACAAAACTAGAGCATGAGATCGGAAGAGCGGTTCAGCAGGAATGCC
	145	11021048	6:G>A	TGCAGTGCAAAGTGTGTGGCATGAGATCGGAAGAGCGGTTCAGCAGGAATGCCGAGACCGATCTCGTAT
	146	11021062	49:A>C	TGCAGTGCACCAGTGCATGTTACATTGCTGCAAATTTGGCAGTAGTGCAAAGAGCATGAGATCGGAAGA
	147	11021069	22:C>T	TGCAGTGCACTTCACTTACTTCCATGCATGAGATCGGAAGAGCGGTTCAGCAGGAATGCCGAGACCGAT
	148	11021088	8:A>G	TGCAGTGCATGAGGTTATGCATGAGATCGGAAGAGCGGTTCAGCAGGAATGCCGAGACCGATCTCGTAT
	149	11021096	27:C>G	TGCAGTGCCAATTATATTACAATGGAACATGACATTTAAGGGGTTGAAGCATGAGATCGGAAGAGCGGT
	150	11021111	12:C>T	TGCAGTGCCTGCCGATGCGACTTCGGCATGAGATCGGAAGAGCGGTTCAGCAGGAATGCCGAGACCGAT
	151	11021118	28:T>C	TGCAGTGCGATTGGGCAGCCCATTCAACTCAAAAAGTAGTGCATGAGATCGGAAGAGCGGTTCAGCAGG
	152	11021119	7:C>T	TGCAGTGCGCCAAAATATATAACGTGTTGCAGTGCAACAATGCATGAGATCGGAAGAGCGGTTCAGCAG
	153	11021133	19:G>T	TGCAGTGCTATTGTGTCCTGCCAGCAGGGAGCCTTCCCCCCGGCAGTGATTGCATGAGATCGGAAGAGC
	154	11021192	7:G>T	TGCAGTGGCCAGCAAATGTGACAGCAGAACCCAGAATTGATGCATGAGATCGGAAGAGCGGTTCAGCAG
	155	11021231	47:C>T	TGCAGTGTAAACCAAGCCTAAGGCTAAGAAACAATTACACATTTAACCCATGCATGAGATCGGAAGAGC
	156	11021236	38:T>A	TGCAGTGTAAGACAGGGAATCATGTAAACCATACTTCATAGCATGAGATCGGAAGAGCGGTTCAGCAGG
	157	11021249	5:T>A	TGCAGTGTAGATGTGCTGACAAAGTATATGAAGAGCATGAGATCGGAAGAGCGGTTCAGCAGGAATGCC
	158	11021291	34:T>G	TGCAGTGTCTGCAAAACCAGGGCAGTTATTGCTGTGCCTAGTTTGTTGCATGAGATCGGAAGAGCGGTT
	159	11021292	26:C>T	TGCAGTGTCTGCTAGTGACATCACTTCATTAGCATGAGATCGGAAGAGCGGTTCAGCAGGAATGCCGAG
	160	11021294	42:G>A	TGCAGTGTCTGTACAGCTGCTGCTTCCCCATATAGTAAAATGGGCTTCCTGCATGAGATCGGAAGAGCG
	161	11021309	8:G>A	TGCAGTGTGAATGAGCCCTAAGGTAGCATGAGATCGGAAGAGCGGTTCAGCAGGAATGCCGAGACCGAT
	162	11021314	30:A>C	TGCAGTGTGCACTACATACTGTTGTTACTAAGCATGAGATCGGAAGAGCGGTTCAGCAGGAATGCCGAG
	163	11021338	17:A>T	TGCAGTGTTAACTCATGAGCGTTAATGCATGAGATCGGAAGAGCGGTTCAGCAGGAATGCCGAGACCGA
	164	11021347	26:A>C	TGCAGTGTTCTTTTCATATCAGCTATAACTGTGCATGAGATCGGAAGAGCGGTTCAGCAGGAATGCCGA
	165	11021361	42:A>G	TGCAGTGTTTTCACCACACAATGCCTGCATTTCATGAGTAATATAGAAAATGCATGAGATCGGAAGAGC
	166	11021369	40:T>A	TGCAGTTAAATAGTCCACTTGACACCAGAATCAGTGGGCGTATGCATGAGATCGGAAGAGCGGTTCAGC
	167	11021376	19:A>G	TGCAGTTAAGCTGAGCTGGATTGCATGAGATCGGAAGAGCGGTTCAGCAGGAATGCCGAGACCGATCTC
	168	11021377	11:T>A	TGCAGTTAATCTGAGGGCCCTAACAAACCAGGCATGAGATCGGAAGAGCGGTTCAGCAGGAATGCCGAG
	169	11021389	13:A>G	TGCAGTTAGATTTATTACCAAAGAGCCATGCATGATATCCCATGCATGAGATCGGAAGAGCGGTTCAGC
	170	11021420	13:G>C	TGCAGTTCAGTTCGCACCAGAACACCATGAACAGGCAAAAAGTTCTAGCAAGCATGAGATCGGAAGAGC
	171	11021450	5:T>C	TGCAGTTCCTTTTCTCCAGAGCATGAGATCGGAAGAGCGGTTCAGCAGGAATGCCGAGACCGATCTCGT
	172	11021474	7:G>T	TGCAGTTGAAAATCCATTTAGTCTTTGTGCCTTATTGATATATGCATGAGATCGGAAGAGCGGTTCAGC
	173	11021475	7:G>A	TGCAGTTGAAATCTAAAGTTTTGAAAGCAATTGAATTAGCATGAGATCGGAAGAGCGGTTCAGCAGGAA
	174	11021489	16:G>A	TGCAGTTGCATAAAAAGACCTCCCAATTTATCAGCATGAGATCGGAAGAGCGGTTCAGCAGGAATGCCG
	175	11021500	12:C>A	TGCAGTTGGAGTCTAGTAACAAGGCATGAGATCGGAAGAGCGGTTCAGCAGGAATGCCGAGACCGATCT
	176	11021510	17:G>A	TGCAGTTGTGAACAGCTGTGTTGGCATGAGATCGGAAGAGCGGTTCAGCAGGAATGCCGAGACCGATCT
	177	11021548	28:C>A	TGCAGTTTAGTTGGAACGGAAACTAGGGCAACAATGCTAAGAATGTTGGGACCTGCATGAGATCGGAAG
	178	11021561	11:C>T	TGCAGTTTCCACCTGACATTACTGATGTATCTGAGCATGAGATCGGAAGAGCGGTTCAGCAGGAATGCC
	179	11021573	15:T>C	TGCAGTTTCTGTATGTTCAGCATGAGATCGGAAGAGCGGTTCAGCAGGAATGCCGAGACCGATCTCGTA
	180	11021576	32:A>G	TGCAGTTTGAAATACTGTACCACAGTACAGTTACACTCCAGCATGAGATCGGAAGAGCGGTTCAGCAGG
	181	11021587	25:G>A	TGCAGTTTGTGTGGGTTTTGGGAGCGCGGCTCATTAGTGTGTGACTGGCATGAGATCGGAAGAGCGGTT
	182	11021588	28:C>T	TGCAGTTTGTTCCAGCGGTTACAGTTCTCGGCATCCTGGTCATGATGTGCATGAGATCGGAAGAGCGGT
	183	11021593	19:G>A	TGCAGTTTTACCTTTCCCTGATTGCCCACCTGAACACTGGCATGAGATCGGAAGAGCGGTTCAGCAGGA
	184	11021596	13:T>A	TGCAGTTTTACTTTAAGCATTAGCAGCATGAGATCGGAAGAGCGGTTCAGCAGGAATGCCGAGACCGAT
	185	11021968	17:G>C	TGCAGTGGATTGCTTTTGAGAGGGCAGTTGACAGGTGCTTAGGAAATATGTTGCATGAGATCGGAAGAG
	186	11022023	46:C>T	TGCAGTTCCTTCACAGTCCTTTAAAGGAGGCTTGAAGTGCCCTTAACGCATGAGATCGGAAGAGCGGTT
	187	11023077	29:C>T	TGCAGATAAAAAGGAACTAATGGAGCATTCGAGCATGAGATCGGAAGAGCGGTTCAGCAGGAATGCCGA
	188	11023082	27:G>T	TGCAGATTGAGATTGTGTTGACCAGCTGTTGTCCTCTGCTGAGCATGAGATCGGAAGAGCGGTTCAGCA
	189	11023083	5:G>A	TGCAGGTTTGGTGCACTTTCTGCATGAGATCGGAAGAGCGGTTCAGCAGGAATGCCGAGACCGATCTCG
	190	11023101	42:G>A	TGCAGCCTAAAATTGTGTAGACCAGCTGTAGCCACCTCTACTGAGCATGAGATCGGAAGAGCGGTTCAG
	191	11023122	9:C>T	TGCAGCTTCCTGGTGGGACTATCTCAGTGCAGGCAATCTGTGATTCTGGTGCATGAGATCGGAAGAGCG
	192	11023158	40:T>C	TGCAGGTGTGGTGCACTTTCTGAAAGTTGCCCAAAACTCCTGCATGAGATCGGAAGAGCGGTTCAGCAG
	193	11023168	14:G>A	TGCAGTACCGTGCAGTTAGGCATGAGATCGGAAGAGCGGTTCAGCAGGAATGCCGAGACCGATCTCGTA
	194	11023221	7:T>C	TGCAGTTTGGGGGAAGGTGCACACTCCGCTACTCCTCCAGCAGTGTATGAAGCATGAGATCGGAAGAGC
	195	11023321	12:A>T	TGCAGACTGAGAATGTGTAGACCAGTTGTTGACATCTACTGAGCATGAGATCGGAAGAGCGGTTCAGCA
	196	11023425	5:G>C	TGCAGGAGGAGTTTGGGCCAATGGAGACAGAAGCAGACTTAATTTACTGATTTGAGCATGAGATCGGAA
	197	11023447	40:G>T	TGCAGGTACTGTGATTATCTCCTAAACTTGCACAGTTCAGGAGATATTCAGAGTGCATGAGATCGGAAG
	198	11023534	7:G>C	TGCAGTGGTCATGTGGTTATAAAAAGCATGAGATCGGAAGAGCGGTTCAGCAGGAATGCCGAGACCGAT
	199	11023541	13:G>A	TGCAGTGTTCATTGGCTAACAAGGAGCATGAGATCGGAAGAGCGGTTCAGCAGGAATGCCGAGACCGAT
	200	11023681	59:A>G	TGCAGCTTTTGGCATGAACTACTGCTGGACATCAAATGTGTCACAGTCAATCAGAGCAAAAGCACAGGC
	201	11023764	53:A>G	TGCAGAATGCAACATTTTAGAGATGATTTTGCTAAACAGGATCTGTTCAGGACAATTTTGTTATATAAC
	202	11023776	41:G>A	TGCAGACAAAGTGACAAAGTCGCAGCAGAGTAACTTCCACAGCAGAAAGTTACTTCCATGCATGAGATC
	203	11023807	14:G>A	TGCAGACAGGAAAGGAAAGGTGAGTCCTGCCTGTAACTTTCCAATCTCCCTGTGCCTGCTCAGGAACTA
	204	11023887	12:A>T	TGCAGAGAATTAAGTCACTGGAACGCTGTACACAGGCTTTTGGGCCTAGCTCTGACTATAGCAGCATGA
	205	11023913	16:G>A	TGCAGAGCTCAATGAGGAGAGCTCTGAGTGCTGATTGGAGAGAAGGGATACACCCCCTTCACACAGCAT
	206	11023913	50:C>T	TGCAGAGCTCAATGAGGAGAGCTCTGAGTGCTGATTGGAGAGAAGGGATACACCCCCTTCACACAGCAT
	207	11023913	60:A>G	TGCAGAGCTCAATGAGGAGAGCTCTGAGTGCTGATTGGAGAGAAGGGATACACCCCCTTCACACAGCAT
	208	11023958	62:C>T	TGCAGATAAAGAGGTACAACATACACTATATAGTCAAAAGTACTGGGACGCCTGCCTTTACACGTATAT
	209	11023973	35:G>T	TGCAGATAGCTAAACAAGTAGAAAGCCAAACTGGGGTGATTGTTTCCCATTACACAATACTGCATACAG
	210	11024030	25:A>G	TGCAGATCTTACATCTCAACCAAAGACAAATGCCAATTAGGCAGCTCTTTCATTCTTTCTAGTAAGCAT
	211	11024035	62:C>A	TGCAGATGAGACAGCAATGCACTAGTGCAGATGCTGAACTAATATAGGCCATTTGGAGCCAGCATCAAT
	212	11024064	64:C>T	TGCAGATGGGCTCGGGAGGTGCAGGGGCATGAGATATTTGTAGCAGTGCTATTTCACAGTATAGCATAC
	213	11024148	7:C>T	TGCAGCACGGACCCCAATATAATCAGCGTAGCTGACCATGAAGTCCAAGTACACTAGGCACACTGCTGT
	214	11024157	43:G>C	TGCAGCACTTTTTACAGGAATAGCCCGGATTAATATTAACTAGGCGGCAATAGTACTCTACGCTGGGCA
	215	11024187	41:A>G	TGCAGCATGAGTCCAATCTGGTTGCTATTGGGGACAGCAATACAAGGTGCCGTGAAGAGTTCTTGAAGC
	216	11024217	8:C>T	TGCAGCCACAGCTGTCACTCTGATGCCTTGCAAATATTTATCCGACTTGGGAACTTTTTCCTATTGAAA
	217	11024284	6:G>T	TGCAGCGGTCTTTGAGTTGTTTTGTTTGCGGGTCTTTCTGCCTTTAGTTTTGCCTTCAGCAAGTGAAAT
	218	11024325	45:G>A	TGCAGCTCATTCCGTTAATGGAGAACCTTCCAAAGCTACGGGGACGTAAACTTCGATTTGATGAGCCCA
	219	11024351	52:A>G	TGCAGCTCTGCAAGGTCTGGACCCTACATATGGTGTGTGGTGCTGTGTGTATATGCTTGGCATGAGATC
	220	11024357	6:T>G	TGCAGCTCTGTGTACTGGCAGTCTTCCTGCATGGTGTCCCTAGCCCCATAGACCTCTATTAGGTTGGAC
	221	11024372	28:T>C	TGCAGCTGAGCATTATGGGAGTGGATAGTGGTTTTTGGGTCTTGCATTCTCTCTTTACACAATTATTAT
	222	11024377	33:G>A	TGCAGCTGATGGGAATTCCCCAACACATGACTTGTTGCATAATAAAGCATGAGTTTCATTTGTATTACT
	223	11024395	47:A>T	TGCAGCTGTAATTGCAGCAAAAGGTGGTTTTACAAAAGTATTGACTCAGGGGGGCTGAATACAAATGCA
	224	11024433	5:C>A	TGCAGCTTTACCCATGTTCCTGTGCCCTGTGTTTGATTCCTGTGTTTGACCCAGCTTATCCTGAGCATG
	225	11024433	27:T>C	TGCAGCTTTACCCATGTTCCTGTGCCCTGTGTTTGATTCCTGTGTTTGACCCAGCTTATCCTGAGCATG
	226	11024447	21:T>C	TGCAGGAAACACACTTCAAAATGGATCATATCCCCAAGATGTCGAACAAAGACTTCCCTATAGCTATGC
	227	11024456	26:G>C	TGCAGGACCTTGGCTGTCAGTCCTGTGCACCAGTTGCTGGGGTATACAGCGTTTTCCCCTGAGAATTCA
	228	11024497	24:C>T	TGCAGGCAATATGTTGCCTCCTAGCCACCTGATTTAAACCCATGATTGCTGTGCAATGCATGAGATCGG
	229	11024531	10:A>G	TGCAGGCCAGAAATTGTGGGCTGTCATATCAGTTGGACATTTACACTTGCAAAGATGCAAGCAACAGCA
	230	11024550	60:A>G	TGCAGGCTAAAAGGAAACAAATCTATATGTGTATGGCCAGGTTTAAAAGTGGAGAGGGCTATGCATGAG
	231	11024575	65:C>A	TGCAGGCTTCATCGTCATCACTTGCCATCCTTGACTCTCTTGCTTAGCAGGCGTGAGGAGCATAACGAA
	232	11024620	18:C>T	TGCAGGTAACTGCCAGGCCCACAAAACATCACCAGCAAACAGAGTGCCTATACACTAGAACTGACAGTT
	233	11024654	24:T>G	TGCAGGTCATAATCAACTACATTGTTACTTTTACACTCTCCAGTAATCTTTTCCTGGGCCATGACAAAA
	234	11024656	5:G>A	TGCAGGTCCACACCTGTTCCCACAGGTGCAACCACCCGCACAGAAAAACGCTCTGGATGCATGAGATCG
	235	11024659	30:G>T	TGCAGGTCTATGAGGCACAGAGACTGTGTAGCTGTGTTGGATGGGCTGCTGGTGTCCTGCTGTGCTGGT
	236	11024672	27:C>T	TGCAGGTGAAGTGAAGAAATGGATGGACTCCCCATCCTGGACTCGGAGGTGGACAAGGAATAGCATGAG
	237	11024679	22:C>T	TGCAGGTGCAGCTACAATACATCGTGGCCTTGTAGTTTCTTTACCAGACAGTCCCATAGGATAGAATCA
	238	11024723	35:A>T	TGCAGGTTTAGTGAGGGTTAGCTATGCTTTCCCATAGACTTCTATGTTGTCTTGTGGTTTTGGTGCAGT
	239	11024737	52:G>A	TGCAGTAAAACATGATAAAAAGCAAGCATTACATCACGTTATTGCAACTTACGGTAATGCATGAGATCG
	240	11024740	38:T>A	TGCAGTAAAAGAAACCTACCTGCCTGCTCGCAGTCATCTGTGGAATGTAGACTGAGCTGCGTAAGCATG
	241	11024743	11:C>T	TGCAGTAAACACGAAAATGTGCTTTTTATGACATGCCTGAGTTCCTTTTTGAACATGGACAAAACTGAT
	242	11024754	20:T>C	TGCAGTAAATACTTCTTACTTTCCTGCTAGAATGAACATTGATCCCTGTTCATCAGAATGAACACTAGT
	243	11024754	24:T>C	TGCAGTAAATACTTCTTACTTTCCTGCTAGAATGAACATTGATCCCTGTTCATCAGAATGAACACTAGT
	244	11024760	50:T>C	TGCAGTAAATGTGCAATAACACACTGAAATATACTGCATTAATCATGCAGTAATGCACTGCAATATACT
	245	11024841	17:G>A	TGCAGTAGAGTTGAGGTGAGTATCTGAAGTCACAGCTCTTAAATTATAGTAGACATATCCTAGAATGTA
	246	11024913	29:G>C	TGCAGTATGTGATCCAACAAACTCACGTGGGTTAAGTAGGATGCTTTGAAATTTGCCATCTGTCCACTG
	247	11024921	14:C>T	TGCAGTATTGAGATCTGAGGTATAACCAAGCAGTGCAAAAAATAATCACGTGTCTAGTTGAAGATCTCT
	248	11024929	50:C>T	TGCAGTCAAAGGAGGACTAGGGAATGTTTGTTCTGGCAAACTGAGCCACGCGGCCTTTTCATGGTGGGG
	249	11024966	21:G>A	TGCAGTCAGGGACAGACGATCGACCCTGGACACAGTGTGCCATAGTCAGAGTGAATAAGGTCTTAACCT
	250	11024967	20:G>A	TGCAGTCAGGGGAGGGCTGCGAGCTAATGTGAGAGTTTAGAATGAGCATGAGTGTAGCTGTGGGCTGTT
	251	11024973	37:G>A	TGCAGTCAGTGGAAGAAGAGGAGGATCAGAGAGACAGGATCACACAGCCTTTATATACAATGCAGGGGA
	252	11024993	29:G>A	TGCAGTCCATACCTCTTAATACAATAAACGATTTTGCTCGCTTTGGAACCCACAGTTTGGCTTTGCATG
	253	11025095	9:C>G	TGCAGTCTTCAAGTCATTCCACTGAATTTCAATGGGCTTTAAGCCTGGGCTCTGACTAAGGCATGAGAT
	254	11025121	10:T>G	TGCAGTGAAATTGTGGGGGGGATGCCGCCCGCTGATTGGCTAAAGCATGGTTTGGCCAATCACAGCATG
	255	11025160	30:G>A	TGCAGTGCAAATTGTTCCTGAACACACCCGGCTTAGTGCTGGGAGCTGTGGTCAAGATGTAAACCAGAA
	256	11025182	10:T>C	TGCAGTGCAGTACACAATTGGGCCCCGTAGCAAACAATGGCAATCCTATTGTTGTGCATTAACCCGCAT
	257	11025191	18:A>C	TGCAGTGCATTTTAAACGAGGTGCAGGAAATGCGCACCGAATGCCTATTTCCCGAACCACGTTCTGGTG
	258	11025231	21:G>A	TGCAGTGGAAAACCTGAGGAAGGGAGAGGAATGAACTGTCTTCAGCAACTGAGCGCCATTCCCAAAGCA
	259	11025260	8:G>A	TGCAGTGGGACGGCACATGCAGGCACCATGATGTACCTGTATGTCATGTACCTGCACTGGGTTTAGAAG
	260	11025292	52:C>T	TGCAGTGTATGTTGAAGTAATCAGCCCTATAGATCTTAATGGGCATTTCCCCCAAACCCAGCATGAGAT
	261	11025298	7:T>A	TGCAGTGTCATTGTCTATTAGGTGTGCCAGAGGGGCTGAAACTGTTCTTGGGGTTGGGAGGCAGAGCTC
	262	11025324	36:G>T	TGCAGTGTGCAAGAGTTCTAAGTGGAGAACAAAATCGAATAAAGAAATCAAAATGCAGCCATCACAACT
	263	11025339	48:T>G	TGCAGTGTGTGTGTTGATTGCACATAAGCACACATAAAAGCTTGTGCATTGACAGTCATTTGCATGAGA
	264	11025348	37:C>T	TGCAGTGTTCTTTTATGGAAATGTGTATATGGCACTGCCTCGATGGTAGACATCATCAAGCATAAAACC
	265	11025385	20:T>C	TGCAGTTAATGAAGCAATAATTGATAAGGAGACATTTGAATCTTTGGAGGTCAAGCATCCATGCATGAG
	266	11025385	32:C>T	TGCAGTTAATGAAGCAATAATTGATAAGGAGACATTTGAATCTTTGGAGGTCAAGCATCCATGCATGAG
	267	11025417	35:T>C	TGCAGTTATACTGAATTGTCTCTGCATTTGACCCTTATCTACACTGCACCTGTACCACACTATACAGCA
	268	11025438	48:G>T	TGCAGTTCAGCTCCGGTTGGCCTGCCACATTCATCTTCACCTCTCCGAGGCTGGCCAAACCCCCTCCGC
	269	11025441	9:T>C	TGCAGTTCATAACTGAAATCAAGGGGAGAGGCCCAGCCAAATGTGCAAGAAAAAGCAGCATGAGATCGG
	270	11025444	13:T>C	TGCAGTTCATAGGTGTTAGGCCCTCTGCCTCCAAATGACCCACAATGGTGGATAAGAACACAAAGCACA
	271	11025485	14:A>G	TGCAGTTGATTTGGATATACAAGGGGTTGTTTCAGACTTTATTGATGCATTGAGTACCACACTGCATTT
	272	11025571	43:A>T	TGCAGTTTACTAAACAGGTGCAAAATTAGAACCAAAACAGGTTAAAGATGATAAAGAGCATGAGATCGG
	273	11026221	9:T>G	TGCAGAAATTTTGTCAAAAGCTGTAGATGGTCAGAGCCTACAAGCATGAGATCGGAAGAGCGGTTCAGC
	274	11026223	17:G>A	TGCAGAACAAAAGGTCAGTGCAAAAGTAGTCCCATTATAAAGGCATGAGATCGGAAGAGCGGTTCAGCA
	275	11026227	37:A>C	TGCAGAACAATGCAATCTAGTGCAGTTTGTTTTGAAAAGTAGTGCATGAGATCGGAAGAGCGGTTCAGC
	276	11026242	12:G>A	TGCAGAACAGGAGTGCAGAAACCATGACATGAATCTACATACAGCATGAGATCGGAAGAGCGGTTCAGC
	277	11026266	19:C>G	TGCAGAACTCGTACTCTGCCAGTTATACAACAGCAACACAGCATGAGATCGGAAGAGCGGTTCAGCAGG
	278	11026271	15:T>G	TGCAGAAGAAAGAACTGCATCCATTATCTACCAGATGGCATGAGATCGGAAGAGCGGTTCAGCAGGAAT
	279	11026331	26:T>A	TGCAGAATAGATTGTTGATCATTGTGTTTTTGGTGTCAGACTGTGACATTGCATGAGATCGGAAGAGCG
	280	11026331	32:G>A	TGCAGAATAGATTGTTGATCATTGTGTTTTTGGTGTCAGACTGTGACATTGCATGAGATCGGAAGAGCG
	281	11026334	32:A>G	TGCAGAATATAGAAGATGGTACATGACTTGCAAGACACTGCATGAGATCGGAAGAGCGGTTCAGCAGGA
	282	11026373	31:A>T	TGCAGACAAGCAACAGGAGGTGATCCAGGAGAACAGGCATGAGATCGGAAGAGCGGTTCAGCAGGAATG
	283	11026380	26:A>C	TGCAGACAATTACCAGTTACCACATAAGCATCCAGCATGAGATCGGAAGAGCGGTTCAGCAGGAATGCC
	284	11026398	9:G>C	TGCAGACACGACATCTCTATTGGGGAGCTCGTTTGGTAGGGGTAGCAGGAATGGCATGAGATCGGAAGA
	285	11026418	22:G>A	TGCAGACAGCTTACAACAGATGGTCAGAGATTGTGAGCATGAGATCGGAAGAGCGGTTCAGCAGGAATG
	286	11026423	30:G>T	TGCAGACAGGCCCTTGATCATAAAGGCTGTGCATACACTCAGCATGAGATCGGAAGAGCGGTTCAGCAG
	287	11026474	31:C>A	TGCAGACCATCTGTGTAGCTGTCTGCCCATACCTCCAATACAGGCATGAGATCGGAAGAGCGGTTCAGC
	288	11026577	24:C>G	TGCAGAGAAGTGTGGAGTCTCATTCAGAGCATGAGATCGGAAGAGCGGTTCAGCAGGAATGCCGAGACC
	289	11026660	23:G>T	TGCAGAGCAGGGGATTGCAAGGAGATGGGTGGCACAGGAGCATGAGATCGGAAGAGCGGTTCAGCAGGA
	290	11026677	23:C>T	TGCAGAGCCTGTTGGCTTAGAGTCCAGGCTGGACGTACCTTTGGCATGAGATCGGAAGAGCGGTTCAGC
	291	11026688	24:A>G	TGCAGAGCTGCTTGGTGGGAAGGGACACCCAACCTTAACATAGCATGAGATCGGAAGAGCGGTTCAGCA
	292	11026688	38:C>T	TGCAGAGCTGCTTGGTGGGAAGGGACACCCAACCTTAACATAGCATGAGATCGGAAGAGCGGTTCAGCA
	293	11026782	28:G>C	TGCAGAGTGCCCCTATAGCAAGCTGCTTGCTCTGGGGGCACTTGTGCATGAGATCGGAAGAGCGGTTCA
	294	11026792	14:C>T	TGCAGAGTGTAGATCACTTGCTCATAGGTATGAACTTCATCATTAAACAGCATGAGATCGGAAGAGCGG
	295	11026819	9:G>A	TGCAGATAAGGCTCCGGGCTCCCATGCATGAGATCGGAAGAGCGGTTCAGCAGGAATGCCGAGACCGAT
	296	11026819	14:C>T	TGCAGATAAGGCTCCGGGCTCCCATGCATGAGATCGGAAGAGCGGTTCAGCAGGAATGCCGAGACCGAT
	297	11026857	14:G>A	TGCAGATATCTGCTGGGACCCAAAGCAAGTCTGTGCATGAGATCGGAAGAGCGGTTCAGCAGGAATGCC
	298	11026875	10:C>T	TGCAGATCAACGCTGATGACTTCAGCATGAGATCGGAAGAGCGGTTCAGCAGGAATGCCGAGACCGATC
	299	11026923	8:G>A	TGCAGATCGGCTGCTGGTTTTCCAGCATGAGATCGGAAGAGCGGTTCAGCAGGAATGCCGAGACCGATC
	300	11026930	15:G>A	TGCAGATCTATTTCTGTCACAGCACTGATTAAGCACTTCCATGGCACAAGCATGAGATCGGAAGAGCGG
	301	11026933	25:T>A	TGCAGATCTCTGATGGTGGCAGGTATGAGGAATAAATCATCCTCTAGCATGAGATCGGAAGAGCGGTTC
	302	11026957	21:T>C	TGCAGATGACCCTGTGTGTGTTTCGACCATGACTGTAATGTCAGCATGAGATCGGAAGAGCGGTTCAGC
	303	11026970	22:C>A	TGCAGATGCAATTTGCATAATACTTTATCCTGATTAGCATGAGATCGGAAGAGCGGTTCAGCAGGAATG
	304	11026984	23:T>C	TGCAGATGCTCACTGAGGACCCATAGAAACGTATCAGTGCATGAGATCGGAAGAGCGGTTCAGCAGGAA
	305	11027024	14:G>A	TGCAGATGTTCAATGATTGTATGAATTGCACAATTAAGCATGAGATCGGAAGAGCGGTTCAGCAGGAAT
	306	11027036	26:A>G	TGCAGATTACAACGCCATTTGTCAGGAGGAGAATATTATCAGGATTTCTTGTCCAGCATGAGATCGGAA
	307	11027043	33:C>A	TGCAGATTCAACGTTTGAATCAATAATGCAAAACAGGTTCAAGATGGCAAGGAGCATGAGATCGGAAGA
	308	11027043	35:G>A	TGCAGATTCAACGTTTGAATCAATAATGCAAAACAGGTTCAAGATGGCAAGGAGCATGAGATCGGAAGA
	309	11027112	32:C>T	TGCAGCAACAGATCCACTAACCTGGTCACACCCACATGCAGCATGAGATCGGAAGAGCGGTTCAGCAGG
	310	11027146	26:C>A	TGCAGCACAAATTAAACTGTCTGTTGCATTCAGCAGGAAGAATGTAAATGGGTGCATGAGATCGGAAGA
	311	11027159	8:G>A	TGCAGCACGCTATGCCGCACTCCCACCATGAAAGGTAACTGCTTGCCTCATTGCATGAGATCGGAAGAG
	312	11027215	24:C>T	TGCAGCACTGCCACTGATCTGTCACTTCTGTTCCCAAAGATCAGCAGGCATGAGATCGGAAGAGCGGTT
	313	11027266	6:A>G	TGCAGCAGTGAAACAGGAGGAGAGGGAGAGCATGAGATCGGAAGAGCGGTTCAGCAGGAATGCCGAGAC
	314	11027278	24:T>C	TGCAGCATAAAGTGGAAGTTCTAATTCTATTTAAGCATGAGATCGGAAGAGCGGTTCAGCAGGAATGCC
	315	11027285	9:C>G	TGCAGCATACACCAATGGAATGTTCAATGCATCCCTGTGCATGAGATCGGAAGAGCGGTTCAGCAGGAA
	316	11027332	29:C>T	TGCAGCATTACTGATTTCCCTAAAGATCTCTTTGCATGAAAGCATGAGATCGGAAGAGCGGTTCAGCAG
	317	11027349	23:A>G	TGCAGCATTGTTGATGCAAAGGCAATCCTTAGCTCTGGCAGCATGAGATCGGAAGAGCGGTTCAGCAGG
	318	11027363	19:G>A	TGCAGCCAATATGGCGGCCGCACCTCCTCCACAGCATGAGATCGGAAGAGCGGTTCAGCAGGAATGCCG
	319	11027411	31:T>C	TGCAGCCCATGCTTGCAGGAAAGAAATTCGCTCCATGTATGGCCGGCTTGTGGCATGAGATCGGAAGAG
	320	11027431	11:G>A	TGCAGCCGACGGATTTCAGCGTGCAAGCCTTTCAGTGTGTTAGCATGAGATCGGAAGAGCGGTTCAGCA
	321	11027434	30:G>C	TGCAGCCGCCATCTTACCCCGCTGCTCCAGGGGCTCCTAGCAGCCACAAAGCATGAGATCGGAAGAGCG
	322	11027438	6:C>A	TGCAGCCGCTCTCAGAAATGACAGACGCTTATTCTCCAGTGGTCTGTAACATCAGAGCATGAGATCGGA
	323	11027545	10:A>G	TGCAGCGGAGATGGCGCAGGCTTTATTTGCAGGTAAGTGTCACATAATGTGCTAGCATGAGATCGGAAG
	324	11027554	23:C>T	TGCAGCGGGGATGTTGAATATTGCGCATGAGATCGGAAGAGCGGTTCAGCAGGAATGCCGAGACCGATC
	325	11027579	35:A>C	TGCAGCTAAAGAGGGAGAAGTTGGGGGGCAGTAAAAGCATGAGATCGGAAGAGCGGTTCAGCAGGAATG
	326	11027705	14:C>A	TGCAGCTCTTTCTCCTTTCCTTCTTCTGTAGAAAGGATAAAAGCATGAGATCGGAAGAGCGGTTCAGCA
	327	11027717	15:A>G	TGCAGCTGAGGGGTGAGAGTAAAGAGATAGTATCCAGCTGAGCATGAGATCGGAAGAGCGGTTCAGCAG
	328	11027721	24:G>A	TGCAGCTGATATGACCCATAAAGCGGAGTCCTTTGCATGAGATCGGAAGAGCGGTTCAGCAGGAATGCC
	329	11027748	5:T>C	TGCAGTTGGATTACTCAATTTGAAAGGGGCAACCTGAAAGCATGAGATCGGAAGAGCGGTTCAGCAGGA
	330	11027796	24:C>A	TGCAGCTTAGGGTATGGTGCTCAGCGTAGTGAACTTGATGGTAAAAATAGATTTGCATGAGATCGGAAG
	331	11027800	18:G>A	TGCAGCTTATGTAATAACGCTCACAGCATGAGATCGGAAGAGCGGTTCAGCAGGAATGCCGAGACCGAT
	332	11027804	5:T>C	TGCAGTTTCAGCAGCATAAAATAGGAGCATGAGATCGGAAGAGCGGTTCAGCAGGAATGCCGAGACCGA
	333	11027875	5:A>G	TGCAGAAAACTCAAGACAGAACAGTCCCGTTTGCAGCATGAGATCGGAAGAGCGGTTCAGCAGGAATGC
	334	11027901	27:A>T	TGCAGGACAAAATGTCAAAATGCATACACCACCGACACTGTGCATGAGATCGGAAGAGCGGTTCAGCAG
	335	11027901	40:T>C	TGCAGGACAAAATGTCAAAATGCATACACCACCGACACTGTGCATGAGATCGGAAGAGCGGTTCAGCAG
	336	11027954	15:A>C	TGCAGGAGATTGTAAAAGTAATGAGCGGGGTGGCACAAGGCATGAGATCGGAAGAGCGGTTCAGCAGGA
	337	11027971	43:C>G	TGCAGGAGGACTTCCTAACTTTGTGATTGTTCTGTGTTAAATTCAGCATGAGATCGGAAGAGCGGTTCA
	338	11028091	17:T>A	TGCAGGCAGTTAGCTGTTACACAGCTCAATTACCCATCAAAATAACAGCATGAGATCGGAAGAGCGGTT
	339	11028091	32:C>T	TGCAGGCAGTTAGCTGTTACACAGCTCAATTACCCATCAAAATAACAGCATGAGATCGGAAGAGCGGTT
	340	11028093	16:C>T	TGCAGGCATACTGATACTTAGCATGGGGTGTGATGATTTTCCAGCATGAGATCGGAAGAGCGGTTCAGC
	341	11028096	6:C>T	TGCAGGCATCAGCAATGTGAAAGAGACATTGTCTGCATGAGATCGGAAGAGCGGTTCAGCAGGAATGCC
	342	11028097	41:G>A	TGCAGGCATCAGCCTGAACATTGGGGGAGGAGCCACACCCCGGAGGAGACCCAGCATGAGATCGGAAGA
	343	11028103	18:T>A	TGCAGGCATTCTTGTCAATGAGGCACAGGAGATGCGCCCAGCATGAGATCGGAAGAGCGGTTCAGCAGG
	344	11028116	8:A>T	TGCAGGCCAGCCCAAGCCAACCCTTCCTATTACCAGCATGAGATCGGAAGAGCGGTTCAGCAGGAATGC
	345	11028132	8:G>A	TGCAGGCCGTAGTAAGGAGTCGTCTGCACGAAGGCATGAGATCGGAAGAGCGGTTCAGCAGGAATGCCG
	346	11028139	16:G>C	TGCAGGCGAAGACCCCGAGCACATATGCCCTTGGCATATATACAGTCACCCAGCATGAGATCGGAAGAG
	347	11028147	7:T>C	TGCAGGCTAAATATCTCAGCTCTCTGTATCTCTTCTCCTGTCAGCATGAGATCGGAAGAGCGGTTCAGC
	348	11028147	39:G>A	TGCAGGCTAAATATCTCAGCTCTCTGTATCTCTTCTCCTGTCAGCATGAGATCGGAAGAGCGGTTCAGC
	349	11028176	9:A>T	TGCAGGCTGACAGGTTATTAAATTTCACAGCATGAGATCGGAAGAGCGGTTCAGCAGGAATGCCGAGAC
	350	11028207	31:C>T	TGCAGGGAAACTTTTATAAGCTTGTGAAGTGCTTAATTCAAGCAGCATGAGATCGGAAGAGCGGTTCAG
	351	11028244	12:G>A	TGCAGGGCTGGCGCGGGATCCAAAGCATGAGATCGGAAGAGCGGTTCAGCAGGAATGCCGAGACCGATC
	352	11028311	10:A>C	TGCAGGTACAAGCAGGTACCTCTCACTACCTGTGCTTTATGCATGAGATCGGAAGAGCGGTTCAGCAGG
	353	11028315	33:T>C	TGCAGGTACAGGAGCCGCTGTTAGTAGATAATTTGGTATCTGATCTATAGGCATGAGATCGGAAGAGCG
	354	11028327	23:C>A	TGCAGGTAGCAAAGGAGGTTTTTCACCTTAATGCATGAGATCGGAAGAGCGGTTCAGCAGGAATGCCGA
	355	11028329	13:C>T	TGCAGGTAGCGGTCGTATTGCGGCATGAGATCGGAAGAGCGGTTCAGCAGGAATGCCGAGACCGATCTC
	356	11028365	41:C>T	TGCAGGTCAGTTCCTCCGGAGCAGCAGCTCGAGATGGGCGGCTGAAGGTCGGCATGAGATCGGAAGAGC
	357	11028370	17:G>T	TGCAGGTCCACATTATAGTATTGTGACTCCTGCTGGCTGGATGCATGAGATCGGAAGAGCGGTTCAGCA
	358	11028396	14:G>A	TGCAGGTCTGCCGCGATTGGTGTGCGATAAAGCATGAGATCGGAAGAGCGGTTCAGCAGGAATGCCGAG
	359	11028405	18:C>A	TGCAGGTGAACTCATTTTCAACAAGTAAAATCACTCAGTAGCATGAGATCGGAAGAGCGGTTCAGCAGG
	360	11028416	11:G>A	TGCAGGTGAGCGACTCAGAAAATATTGAATAGGATGAGCATGAGATCGGAAGAGCGGTTCAGCAGGAAT
	361	11028417	18:G>A	TGCAGGTGAGCCAACACTGTCAGCTACATCCATCATCCATGCTGTGCATGAGATCGGAAGAGCGGTTCA
	362	11028461	16:C>A	TGCAGGTGTGGTCCATCGCAAACAGCATGAGATCGGAAGAGCGGTTCAGCAGGAATGCCGAGACCGATC
	363	11028474	17:C>G	TGCAGGTTAACCCCTTCCCTGGCAGTGACATTTATACAGTAATGCATGAGATCGGAAGAGCGGTTCAGC
	364	11028501	10:T>C	TGCAGGTTGGTATGAGGGCACAGATGCATGAGATCGGAAGAGCGGTTCAGCAGGAATGCCGAGACCGAT
	365	11028511	5:T>G	TGCAGTTTTGTGGCACCCCTTCACACCTTGTGCTGTTGTGCATGAGATCGGAAGAGCGGTTCAGCAGGA
	366	11028544	40:G>C	TGCAGTAAATAAACTATAGGCAGTGTGGAAGTGGTTAAAAGAGGCACATCTAAGCATGAGATCGGAAGA
	367	11028562	6:C>A	TGCAGTCACTCCTGTCATTCTGAACACCGCACAGTGCATGAGATCGGAAGAGCGGTTCAGCAGGAATGC
	368	11028600	20:A>G	TGCAGTACATATGTGATGACAAACAGCATGAGATCGGAAGAGCGGTTCAGCAGGAATGCCGAGACCGAT
	369	11028608	7:C>T	TGCAGTACCAATCAAATAGCGCAGCATGGCTTGGGCATGAGATCGGAAGAGCGGTTCAGCAGGAATGCC
	370	11028609	15:A>C	TGCAGTACCACCCACAAGATCACCTAGTGGCACAGATGTTAGGCATGAGATCGGAAGAGCGGTTCAGCA
	371	11028626	39:G>T	TGCAGTACCGTGCAAGTTTGTGTGATACATTTTTGAAAAGTAGTGCATGAGATCGGAAGAGCGGTTCAG
	372	11028640	41:G>A	TGCAGTACTCTGGTGATCCCCACAGTAGCTGGGTCTTCTTGGGAAGCTGCATGAGATCGGAAGAGCGGT
	373	11028661	17:C>T	TGCAGTAGCGTGCAATCCGGTGCAGTAAAACTAATGCATGAGATCGGAAGAGCGGTTCAGCAGGAATGC
	374	11028661	31:T>G	TGCAGTAGCGTGCAATCCGGTGCAGTAAAACTAATGCATGAGATCGGAAGAGCGGTTCAGCAGGAATGC
	375	11028721	14:T>C	TGCAGTATCATTCATGGAGTGCCTTGCAAGCTCATGCATGAGATCGGAAGAGCGGTTCAGCAGGAATGC
	376	11028739	10:C>T	TGCAGTATGCCGGCATTGTGGAGCAGAGACAGCAAGCATGAGATCGGAAGAGCGGTTCAGCAGGAATGC
	377	11028772	18:G>A	TGCAGTCAATCTTTTAAAGGCCAGAGGGCACCAGGACTTGACAAACATTGCATGAGATCGGAAGAGCGG
	378	11028776	26:G>T	TGCAGTCACAGGCTGACAAAAGGACTGAAGGCATGAGATCGGAAGAGCGGTTCAGCAGGAATGCCGAGA
	379	11028790	11:C>T	TGCAGTCACTGCTCCTTAAAGCTGAGCTCCAGCTTTCCCTTCAGCATGAGATCGGAAGAGCGGTTCAGC
	380	11028830	24:T>G	TGCAGTCCAAAGATTCAGTTCATGTGCTCCCAAGAAGCATGAGATCGGAAGAGCGGTTCAGCAGGAATG
	381	11028865	37:G>A	TGCAGTCCCCTCCAAAAGCCTCTGTCTCTGGTGAGTCGGTCACATAGGCCATTATGCATGAGATCGGAA
	382	11028869	10:C>G	TGCAGTCCCTCCTCCTCTCTGTACGCTTTCACACGCATGAGATCGGAAGAGCGGTTCAGCAGGAATGCC
	383	11028892	30:C>T	TGCAGTCCTAACTCTATACATTTTGAGAGCCTCCACAGTGGAAGAGCATGAGATCGGAAGAGCGGTTCA
	384	11028911	6:T>C	TGCAGTTGGGGTTATTGACTTGCACTGCATGAGATCGGAAGAGCGGTTCAGCAGGAATGCCGAGACCGA
	385	11028925	17:C>A	TGCAGTCTAGCACTGATCCGAGGCTTGGAACGCATGAGATCGGAAGAGCGGTTCAGCAGGAATGCCGAG
	386	11028931	30:T>C	TGCAGTCTATGTCAGTCTCTCCAACATACTTCTAGGAGTGTCCCTCAATGCATGAGATCGGAAGAGCGG
	387	11028962	31:C>T	TGCAGTCTCTGGCCATCACCTGTAGTATGTCCATAGTCTCTGACCATCTCTTATAGCATGAGATCGGAA
	388	11028965	31:G>T	TGCAGTCTCTTTGCCCCAGTGAGGGTTATTTGAAGGTCTCTGCATGAGATCGGAAGAGCGGTTCAGCAG
	389	11029002	21:T>C	TGCAGTCTTGCTAGGTAATGCTCAGGCACAGTTCCAGCATGAGATCGGAAGAGCGGTTCAGCAGGAATG
	390	11029013	32:A>G	TGCAGTGAAACGTAAATGTGGCTTTGCATTAGAAACTCCTAGAGCATGAGATCGGAAGAGCGGTTCAGC
	391	11029042	19:A>G	TGCAGTGACAAATCTCGTTACACAAGGCATGAGATCGGAAGAGCGGTTCAGCAGGAATGCCGAGACCGA
	392	11029045	15:T>C	TGCAGTGACAGGAGATAGTGCTGCACATGTGTGGGGCTCAGAAGCATGAGATCGGAAGAGCGGTTCAGC
	393	11029056	22:C>T	TGCAGTGACTGTCAATCAGACGCTGCATGGGGCCGTACACAATGCATGAGATCGGAAGAGCGGTTCAGC
	394	11029142	10:G>A	TGCAGTGCCCGCAATGCGTGTTTGGAACCAACTGCCCAAAGACCTTTGTGCAGCATGAGATCGGAAGAG
	395	11029145	22:A>G	TGCAGTGCCCCTCTGAGTTTTCATGCATGAGATCGGAAGAGCGGTTCAGCAGGAATGCCGAGACCGATC
	396	11029171	11:C>T	TGCAGTGCTCACGTGTTTAACAAGCAGCATGAGATCGGAAGAGCGGTTCAGCAGGAATGCCGAGACCGA
	397	11029174	13:C>T	TGCAGTGCTCAGCCGAGTACATGCCTAGAATTGCCTACTGAACCATTAGTTATAGCATGAGATCGGAAG
	398	11029174	43:C>A	TGCAGTGCTCAGCCGAGTACATGCCTAGAATTGCCTACTGAACCATTAGTTATAGCATGAGATCGGAAG
	399	11029219	16:C>T	TGCAGTGGCACGCCGCCCCCTAGATTGCATGAGATCGGAAGAGCGGTTCAGCAGGAATGCCGAGACCGA
	400	11029220	7:G>A	TGCAGTGGCACGTCCCTGCTCTGAAGGCATGAGATCGGAAGAGCGGTTCAGCAGGAATGCCGAGACCGA
	401	11029234	30:T>C	TGCAGTGGCTGCACATGCAGCAGAGGGCTGTCAATGAGTGGCTGCTCATAAAGGATGCATGAGATCGGA
	402	11029254	19:C>T	TGCAGTGGTGCACCACAAGCACCAGCAAGCATGAGATCGGAAGAGCGGTTCAGCAGGAATGCCGAGACC
	403	11029259	16:C>T	TGCAGTGGTGTGCAGGCGGTGTGCACTGAAAAAAGTACTGCATGAGATCGGAAGAGCGGTTCAGCAGGA
	404	11029259	30:A>T	TGCAGTGGTGTGCAGGCGGTGTGCACTGAAAAAAGTACTGCATGAGATCGGAAGAGCGGTTCAGCAGGA
	405	11029265	7:T>C	TGCAGTGTAAGAAAAAACCCTCTGCAAAGCATGAGATCGGAAGAGCGGTTCAGCAGGAATGCCGAGACC
	406	11029284	40:A>G	TGCAGTGTATATTCGCCCATGCACATACACTACAAAATACAGCATGAGATCGGAAGAGCGGTTCAGCAG
	407	11029290	33:A>G	TGCAGTGTCCAATCATAGTGGGAGCGGGACTCCAGAGGCTCCAGCATGAGATCGGAAGAGCGGTTCAGC
	408	11029296	22:T>A	TGCAGTGTCCCATGTTTTTGTATTTCCTAGCATGAGATCGGAAGAGCGGTTCAGCAGGAATGCCGAGAC
	409	11029318	11:C>T	TGCAGTGTGCACAAAGGGGTGAGAGTATTTTGGCATGAGATCGGAAGAGCGGTTCAGCAGGAATGCCGA
	410	11029323	14:A>G	TGCAGTGTGCATGAACCCTAATAATAGCATGAGATCGGAAGAGCGGTTCAGCAGGAATGCCGAGACCGA
	411	11029329	26:T>A	TGCAGTGTGCCTTGATTGATGATGGATAAACAGAACAGCATGAGATCGGAAGAGCGGTTCAGCAGGAAT
	412	11029339	10:T>G	TGCAGTGTGGTCCTTTTTTAATGTATCTGATGCCAACGGTGTCATTTTAGCATGAGATCGGAAGAGCGG
	413	11029359	6:G>A	TGCAGTGTTCTTTGTGACATTTACAAACAGCAAACGACAAGCATGAGATCGGAAGAGCGGTTCAGCAGG
	414	11029359	28:A>C	TGCAGTGTTCTTTGTGACATTTACAAACAGCAAACGACAAGCATGAGATCGGAAGAGCGGTTCAGCAGG
	415	11029392	30:C>G	TGCAGTTACAGGAGTGTCAGGTGCCTTGTTCCCCAGCATGAGATCGGAAGAGCGGTTCAGCAGGAATGC
	416	11029406	34:T>C	TGCAGTTAGGGGCTATTCTTGGTATATGCAATTGTACATTAAAGCATGAGATCGGAAGAGCGGTTCAGC
	417	11029423	23:A>T	TGCAGTTATGGTATGCACAGTACATATTGCTGAATGCGTGTGTTGGCCATGCAAAGCATGAGATCGGAA
	418	11029429	11:C>G	TGCAGTTCAAACAGGTGGTAAAAATGTGCAGTACAGGCAATACTGCATGAGATCGGAAGAGCGGTTCAG
	419	11029437	30:C>T	TGCAGTTCACGGAATCTTGTTACTTGTAAACGTCTTGTGCTGTAAAACTGCACTGCATGAGATCGGAAG
	420	11029446	18:A>G	TGCAGTTCAGTAATGTACAGGCAAACAGCTGACTGGGAGCATGAGATCGGAAGAGCGGTTCAGCAGGAA
	421	11029459	7:C>A	TGCAGTTCATTGAGGGAACCATGAATGCCAACATGTACTGTGGCATGAGATCGGAAGAGCGGTTCAGCA
	422	11029469	44:C>T	TGCAGTTCCATAATTTTCTGCACCAGGCCATGGAAGTCATTACACGTTGGGCATGAGATCGGAAGAGCG
	423	11029477	6:T>C	TGCAGTTCCTCTTTAACTTACCTTGCGGTAAAGCATGAGATCGGAAGAGCGGTTCAGCAGGAATGCCGA
	424	11029502	38:A>G	TGCAGTTCTGCAAGAACTGACAAAAAAGACATACCCTCAGCCTTCCAAATCTATTGCATGAGATCGGAA
	425	11029511	19:T>A	TGCAGTTCTTTGGTCCTAGTTCCACTCACCAGATGAGACACCGCATGAGATCGGAAGAGCGGTTCAGCA
	426	11029530	16:T>A	TGCAGTTGCATTTTTGTGAGTCATGTGTCCATGTTCCACAGGTGCATGAGATCGGAAGAGCGGTTCAGC
	427	11029546	8:G>A	TGCAGTTGGAAGTTCCAGCAGACCAGTGATGGAAAGCATGAGATCGGAAGAGCGGTTCAGCAGGAATGC
	428	11029592	10:G>A	TGCAGTTTACGTACAACTTTCTCCCCATCCATGCATGAGATCGGAAGAGCGGTTCAGCAGGAATGCCGA
	429	11029592	16:C>A	TGCAGTTTACGTACAACTTTCTCCCCATCCATGCATGAGATCGGAAGAGCGGTTCAGCAGGAATGCCGA
	430	11029594	30:G>C	TGCAGTTTACTGTAATGGACCAGCCTGGCCGGTGCATATGTTGCAATAGGCATGAGATCGGAAGAGCGG
	431	11029617	43:T>G	TGCAGTTTCCATAGTAATCAATGAAAACACATCAAAATGCACATTGGCATGAGATCGGAAGAGCGGTTC
	432	11029620	18:T>C	TGCAGTTTCCTGTGTTATTTGCCTGTTCACTAGAGCATGAGATCGGAAGAGCGGTTCAGCAGGAATGCC
	433	11029672	38:A>G	TGCAGTTTTGCCACCCACTCACCTCCCACCTAAAAGATAGCATGAGATCGGAAGAGCGGTTCAGCAGGA
	434	11029684	30:C>T	TGCAGTTTTTTCCTTTCACCTGTGGTGTCCCGTGTTAACAGCATGAGATCGGAAGAGCGGTTCAGCAGG
	435	11030461	26:G>C	TGCAGAGCACTCTGTGATTGGCCAAAGCAGGCAGGCCATATGCATGAGATCGGAAGAGCGGTTCAGCAG
	436	11030495	27:C>A	TGCAGCATCTTTGCAGCCACTTCCTATCTATATGCATGAGATCGGAAGAGCGGTTCAGCAGGAATGCCG
	437	11030504	18:A>T	TGCAGCCTGAGATTGGATAGACCAGCCACTGCCACATCAACTGAGCATGAGATCGGAAGAGCGGTTCAG
	438	11030504	28:C>A	TGCAGCCTGAGATTGGATAGACCAGCCACTGCCACATCAACTGAGCATGAGATCGGAAGAGCGGTTCAG
	439	11030504	37:C>T	TGCAGCCTGAGATTGGATAGACCAGCCACTGCCACATCAACTGAGCATGAGATCGGAAGAGCGGTTCAG
	440	11030506	17:G>A	TGCAGCCTTCCCAGATTGTCTTTCACCCCAATCTGCTTCGGCATGAGATCGGAAGAGCGGTTCAGCAGG
	441	11030521	18:C>T	TGCAGCTTACTGCACTGCCCTTGCAATCTGCATGAGATCGGAAGAGCGGTTCAGCAGGAATGCCGAGAC
	442	11030522	47:G>A	TGCAGCTTCCTGGTGGGAGTATTCAGGTTCCAGCCATTCTTGATTCTGGAGCATGAGATCGGAAGAGCG
	443	11030542	17:C>A	TGCAGGCTGAGATTGTGCAGACCAGCTAATGTCCTCTAATGAGCATGAGATCGGAAGAGCGGTTCAGCA
	444	11030542	25:C>A	TGCAGGCTGAGATTGTGCAGACCAGCTAATGTCCTCTAATGAGCATGAGATCGGAAGAGCGGTTCAGCA
	445	11030561	11:T>G	TGCAGGTGAGTTGCACCTTCAAAAGTCCCGCATGAGATCGGAAGAGCGGTTCAGCAGGAATGCCGAGAC
	446	11030568	33:C>T	TGCAGGTGTGCTGTCACATTAGAAAATCCGCTACGCATGAGATCGGAAGAGCGGTTCAGCAGGAATGCC
	447	11030687	13:C>T	TGCAGACACGCTGCGCTTTGAAAAGTCCTGCATGAGATCGGAAGAGCGGTTCAGCAGGAATGCCGAGAC
	448	11030704	12:A>G	TGCAGAGAGACCACTGCTTCCACACAGAGAGCAATGGTTCTTCTCTACAGCATGAGATCGGAAGAGCGG
	449	11030760	7:T>A	TGCAGCCTGAGAATGTGTAGACTAGCTGTTGACATCTACTGAGCATGAGATCGGAAGAGCGGTTCAGCA
	450	11030760	15:T>C	TGCAGCCTGAGAATGTGTAGACTAGCTGTTGACATCTACTGAGCATGAGATCGGAAGAGCGGTTCAGCA
	451	11030763	41:C>A	TGCAGCCTGAGATTGTGTAGACCAGCCATTTCAACATCTACCGAGCATGAGATCGGAAGAGCGGTTCAG
	452	11030784	8:A>G	TGCAGCTCATCTTGGGTGCCCCCACAGCATGAGATCGGAAGAGCGGTTCAGCAGGAATGCCGAGACCGA
	453	11030816	21:C>T	TGCAGGCTGAGATTGTGTAGACCAGCTTATGTCTTCTATGGAGCATGAGATCGGAAGAGCGGTTCAGCA
	454	11030827	21:T>A	TGCAGGTAGCAGTGCGGTCCCTCCTGTCACAACGGTGGTCCTCCTTACTTTTTTGCATGAGATCGGAAG
	455	11030880	10:G>T	TGCAGTCTTTGACCGTTTCATGCAGCATGAGATCGGAAGAGCGGTTCAGCAGGAATGCCGAGACCGATC
	456	11030880	14:G>A	TGCAGTCTTTGACCGTTTCATGCAGCATGAGATCGGAAGAGCGGTTCAGCAGGAATGCCGAGACCGATC
	457	11031194	16:G>A	TGCAGACTAAAATACCGGGAGATGAGACAAATGATGCTTGTTCTCATAAGCAGAAGTACTTTCCTGATG
	458	11031253	54:T>G	TGCAGAGATGTCAATGGAATACATAAGGGCTCAGATCTTATCTTTCCTTGCATGTGCAATTGTGCATGA
	459	11031259	51:C>A	TGCAGAGCAGCTTTTAGCTGCATGAGTTGTTATCAAAAGAAAGCCGACTGTCCGCTCTAAACAATGGTA
	460	11031267	32:A>G	TGCAGAGCGAGACCCATTCAAGTTAATGGGGCAGCTTTGCAAGTGCCCTGCAACTGTATGCAATGCATG
	461	11031292	25:T>G	TGCAGAGGCAGTTGTTTGAAATTTTTAATTCACAAGAAATTCCATCACCACACACTGTTCCATGCATGA
	462	11031319	16:T>A	TGCAGAGTGAGGGGGGTGTGATTCCATTCTTGATCAAATGGAAGGGGTACGGACCTGAAGAGAACTCAT
	463	11031347	8:C>T	TGCAGATACGGGGCAGCCTAAGAAATTGGCCAACAGGGATGTTTTTAATTGTGTGATGTGGGTGACTGG
	464	11031373	25:C>G	TGCAGATATGCCATCCCTGGAAGCACACTGTCAGCGTCCAGGGTCAGTTGGAGGTTCTATTCACATGTA
	465	11031373	35:G>A	TGCAGATATGCCATCCCTGGAAGCACACTGTCAGCGTCCAGGGTCAGTTGGAGGTTCTATTCACATGTA
	466	11031373	52:G>T	TGCAGATATGCCATCCCTGGAAGCACACTGTCAGCGTCCAGGGTCAGTTGGAGGTTCTATTCACATGTA
	467	11031375	42:G>A	TGCAGATATTCTGGGGAATTTGGACATCCTTATGCCCCTGATGTTGTCATATTTGTAATTTATGACCCC
	468	11031378	53:G>T	TGCAGATCAAACAGCAAAGGACTAGTGCAGCTACTGCATCTTTATAGGCCACTGGGCACCAATGCAACG
	469	11031391	38:G>A	TGCAGATCAGTGAAGAAGTGAGTCTTTCCTTGATAAATGATGTGCAGCCGAGCTGGATAGAGCATGAGA
	470	11031405	15:C>G	TGCAGATCTAGACCTCATGTTATTTGTCCTAGGCTGTTATTTTCTCTGTACCACCAAGTATAGTGCATG
	471	11031455	61:G>A	TGCAGGTGGGTCACATGGTGCAAAAACAGAATGGATTTCCAGGCCACTGCATTTTTAAAATGCTGCATG
	472	11031460	32:C>T	TGCAGATGTATGTCTCCAAAAATGTTGCAGCCCAGACCTTAAAGTGTTAGTAAACCCACAACAGTAAAA
	473	11031568	65:A>G	TGCAGCAGAGCTAGAGTGTGAGAGGAAGAAGCAGCCCATGAAGCCAATCAGATCTTGTGTTGACAAGAA
	474	11031594	36:G>T	TGCAGCATAATATTATTCTCCACAGCTAAGCTTTGAGACTAAACGAAGAGCAGGCAGAGGTGCATGAGA
	475	11031594	43:C>T	TGCAGCATAATATTATTCTCCACAGCTAAGCTTTGAGACTAAACGAAGAGCAGGCAGAGGTGCATGAGA
	476	11031601	19:A>G	TGCAGCATACTGCAAATGAAAGCACACAATTGCAGGATGCAGGAAAAGTACAGAACATTTTAAATGCAG
	477	11031662	28:C>T	TGCAGCCAGATGAGTGGTTCTCTACTGTCAAAACAAGCATGTGAGTAGTCAGATCAGAGCTTAATAGCA
	478	11031668	10:A>G	TGCAGCCATCAATCCAGACCAGCTTTTCCCCACCACTTGGAGAAGGTGTAGGAACCTGTCCCAGCATGA
	479	11031797	10:G>A	TGCAGCTCCCGTAAGATCTGGGCAGGATCATCTCATGAAACAGGAAAGAGCCGATCAGCTGAAGGTACA
	480	11031862	64:C>T	TGCAGCTGGTGTTTCACTTTTCCTGGAAGCAGGTCATTGTTAGACCGTGCCATTTCAGTGGTCACGTGA
	481	11031904	5:C>T	TGCAGCTTATTCTGTCTGATCATTTGGCTGATTAAACATGCTGTTAACCTCTTGGCGCCGACAGCATGA
	482	11031904	55:C>T	TGCAGCTTATTCTGTCTGATCATTTGGCTGATTAAACATGCTGTTAACCTCTTGGCGCCGACAGCATGA
	483	11031910	9:T>C	TGCAGCTTCTATATTTGCAGTTAAGGTTGGAGAACAAACACTAGAAGGTGAATTCACTAAACATTATGC
	484	11031973	20:C>T	TGCAGGACGTAAATACACGTCCTGTCAGAACGGGGAAGCTCCCACCCGGCCACTGTACATATACGGTGG
	485	11032032	43:C>T	TGCAGGCAGATCTGGTCAGGCAGATGGAAGAGGTCCTTTCCCGCATAGAGCCCGTGGATTCGGCATGAG
	486	11032090	19:T>C	TGCAGGCTCCACCTCTCCTTCTCTCTGTATGTGATTGCAAAGGTGATGGGGGTTAGCAGAAACAGAGGG
	487	11032163	17:C>G	TGCAGGTACACTTTAAACTGTTACTAAACCCACAACAGTAAATCAATCTGTATATGCAGTAAAGCATGA
	488	11032175	7:A>G	TGCAGGTAGGTTTTCTGTGGACTCCAATGTCCAAGTCACCCCTCATTTACATGTAACACAAGCATGAGA
	489	11032176	29:C>G	TGCAGGTATAAGCTGAATTCAGGCAGATACAGTAGGTACCAAATCTCAGAGTCCAGTTTAGATACAGGC
	490	11032195	31:G>A	TGCAGGTCAGCAGTACTCTGCGTGTGGCTCCGCATTGATGGCACATGGTAAATGGCCTTTGCATAGTAC
	491	11032254	11:C>A	TGCAGGTGGCTCTGCCAGTAGCTGGGCACAGATCCCTATGAGAGCACAACAAACAGTATAACAGCATGA
	492	11032292	31:C>A	TGCAGGTTGAGCACTTTAAAGATCACTCCGCCAAACACTGACACCAAGGAAGATAGATAGCAGCCGGGA
	493	11032336	58:A>G	TGCAGTAAGGAGCTGAAGTGGGAAAGTGCTTCCTCAACACAGATTGGCAATAAAGCGCACAAAGCATGA
	494	11032344	38:C>T	TGCAGTAATCTGGTTAATAGTCCCTTTTTCCCATCGCACACCAAGCTCCTGAAACACATGGCATGAGAT
	495	11032367	6:A>G	TGCAGTACCATCTAAGGCTGGATTCGCACTAACAAATGCATGGTGCACTTGCATGTGTTGTAGTAGCAT
	496	11032498	46:G>A	TGCAGTCACAAGGCACCTGTTGCTCTGCTGTCTGCTTCATCTGTACGGGACTCTGTGGCAGGATGAGGA
	497	11032508	8:C>T	TGCAGTCACATTTGAGAAAACCCCACTATATGTTTGTTATGTGTTCAGCTTCACACAGCATGAGATCGG
	498	11032606	46:C>A	TGCAGTCCTTAGCAACAACACATTGACTTCCTCTGGACAGCCTGGTCCCCTTGTTGTGTTGAAAGCCCT
	499	11032626	11:T>C	TGCAGTCTATATCTCTCTTAATGCAAAAAAGGATTTGATTGCTTTAGAAACCACTGCTTGACATTGCAT
	500	11032678	39:A>T	TGCAGTCTGTCTGCATCCAGATCCATGCTTCAGACCCACATGGGTATACACATGGATACGCATGAGATC
	501	11032680	59:A>G	TGCAGTCTTAAATAAAACCTTTGGTAACAGCAAAACAACTAATCTGTGGGAGGTAGTTCACAGAAAAGG
	502	11032685	36:C>A	TGCAGTCTTCAGTTGTTTGTGGGTCTTTCTGCCTTTCGTTTTGCCTTCAGCAAGTGAAATGCATGAGAT
	503	11032695	68:C>T	TGCAGTCTTTTACTGCTAGGATTTGCTTGAGACTTACAGTCTTCCTGTTAATCAGGAGTACTTACCTAC
	504	11032700	44:T>C	TGCAGTGAAAGTGCACATATACAGAAGTGTATATGGAGTTTGTGTACTATAATTCTTTTAGGCATGAGA
	505	11032748	24:C>G	TGCAGTGATTGGTTGTTAGAAATGCCAGCATCCTTAGGGTTAAGGTTGGGGTTAGGTCATGTGCATGAG
	506	11032752	41:C>T	TGCAGTGCAATGCATTGTAATCTGCAATACATTAGGGTGCCCTTGACAAAGCAATGTGCATTAATGCAT
	507	11032765	29:G>T	TGCAGTGCAGGAGATAACAAAAGGCTTCTGTTAGGTCTGATTCCGATACCTCATTATAATTGCATGAGA
	508	11032842	14:G>A	TGCAGTGGAGTGACGATAAAGTGAATATAGACACCATTAAAATGAACCTGTTGTTTTTGAACAGCATGA
	509	11032923	14:A>G	TGCAGTGTGAGGGGAAAAAGCAGTACAAGAGGCCAATTATTCTATGTGCTGACAAGAAGCATGAGATCG
	510	11032964	13:G>A	TGCAGTTAAACAGGACATCAAGATCCAGGACCTACCAAAGCCTACAGCTGGACAACAAAGCATGAGATC
	511	11033011	8:G>T	TGCAGTTAGTTGCTTGGCTTTCATGCTGATCCCCTGGTTTTACTATCTGGCTACTGATCAGAATAAGCA
	512	11033035	52:G>A	TGCAGTTCAGTATACAGTATTGTTGATGTCTTTGCAAAATTTGTGCATTTTGGTTTTTATGGTATAGTG
	513	11033055	56:G>A	TGCAGTTCCTTCCTGGTGGCCTAGGCAAATGATGATGTCCTACATCCCTGGGCAGAGGGAGGTTTTCTC
	514	11033067	62:G>T	TGCAGTTCTCTTGCTTGGGCTCACGCTGTGCTTTACTGCTGATCTTCTTGTGCTCTACCTTTGTGCCCA
	515	11033144	51:A>C	TGCAGTTGCTTCTCTTGATGTTACTTCACATAACTGCCATACATTTGAAATAACAAAGGTCGGCATGAG
	516	11033175	16:G>A	TGCAGTTGTTACCATCGGGAAACACTCTCTGATTAGTGACATACAGTTGTCTTTTTAAAGCATGAGATC
	517	11033216	61:T>C	TGCAGTTTCTGTGTTGATGGGGGATGATCATCGTAAATTTCCCACTTGGTGACTGGGAGATTACATTGC
	518	11033640	17:A>C	TGCAGAAAGAGCCAATCAGTTATGCTGCTATGCACGGTGCATGAGATCGGAAGAGCGGTTCAGCAGGAA
	519	11033640	27:C>T	TGCAGAAAGAGCCAATCAGTTATGCTGCTATGCACGGTGCATGAGATCGGAAGAGCGGTTCAGCAGGAA
	520	11033649	21:A>G	TGCAGAAAGCCCACTGCTTCCACACAAAAAACAAGGGTCCTTCTCTTCAGCATGAGATCGGAAGAGCGG
	521	11033667	16:C>T	TGCAGAACAAATGAACCTTGGGCTTGTGCAGCTTGCTTTCAGGTGCATGAGATCGGAAGAGCGGTTCAG
	522	11033704	7:C>G	TGCAGAACAGCAGCTACAACTTAGATTAGGAGCATGAGATCGGAAGAGCGGTTCAGCAGGAATGCCGAG
	523	11033768	36:C>G	TGCAGAATGCACTGATCAGTGCCTCTAATATGTTTGCGCATGAGATCGGAAGAGCGGTTCAGCAGGAAT
	524	11033795	49:A>G	TGCAGACACATCTCTTTTGGGGTGCTTCTTGGGTACTGGTACCAGGAACAGCATGAGATCGGAAGAGCG
	525	11033886	27:C>T	TGCAGACCGCAATACCCAGCCCCGGAGCGAGCATCCAATATACTTGCTTGCAATGGCATGAGATCGGAA
	526	11033931	47:A>T	TGCAGACTCAGTCATGTATATACTGTATGCATGATTGTGCCTCTTCCAGGTTCGGAGCATGAGATCGGA
	527	11034030	13:C>A	TGCAGAGAGACCGCTGCTTCCATACACAGAGGAAGGGTCTCCAGCATGAGATCGGAAGAGCGGTTCAGC
	528	11034079	22:G>C	TGCAGAGCACAGGCAGTTTCTGGTAACAACTCGCTGGTATAGCATGAGATCGGAAGAGCGGTTCAGCAG
	529	11034242	25:G>T	TGCAGATATAAAGTGCAGGCACAGCGGAATTTACTGTCATAGCTGAATTTTAGGCATGAGATCGGAAGA
	530	11034276	29:C>A	TGCAGATCAGGAAAGTCAGATGTCTTATTCATAGGCATGAGATCGGAAGAGCGGTTCAGCAGGAATGCC
	531	11034283	5:A>C	TGCAGATCATCAAGAGATGATCAAAATACTACTAGCATGAGATCGGAAGAGCGGTTCAGCAGGAATGCC
	532	11034286	12:C>A	TGCAGATCCACCCCACCAGCACAACCTTCCCAGCAAATCACCTCCAAGCATGAGATCGGAAGAGCGGTT
	533	11034289	31:C>T	TGCAGATCCCAAATGGTGCAAAATAGTGCCTCGAGGTAAAGCATGAGATCGGAAGAGCGGTTCAGCAGG
	534	11034320	18:A>G	TGCAGATGAACAAGTAAAACCTATGTAGGAGGATTTGTCTGGTGCATGAGATCGGAAGAGCGGTTCAGC
	535	11034334	38:G>A	TGCAGATGATCAGACAGGTTCAGATCTTCAGCACCAGGGACAGCTGGTGACTGAGCATGAGATCGGAAG
	536	11034357	12:T>A	TGCAGATGGAGATAACAGAGAAACCGTAGAAACACGCATGAGATCGGAAGAGCGGTTCAGCAGGAATGC
	537	11034358	21:G>A	TGCAGATGGAGATTTTTAAGTGTCAAAGTTTGTTGCTATTGCACGAGCATGAGATCGGAAGAGCGGTTC
	538	11034399	10:T>G	TGCAGATTCTTAACACCACAACAGTAAAATCAGTCTGTATATGCAGCATAGCATGAGATCGGAAGAGCG
	539	11034431	12:T>G	TGCAGCAAAAACTGGTGCAGCTGTGCATGAGATCGGAAGAGCGGTTCAGCAGGAATGCCGAGACCGATC
	540	11034498	28:C>T	TGCAGCACAGCATCTCCGGCAGCTTCCGCGTTGCTTATAAGTTAGCATGAGATCGGAAGAGCGGTTCAG
	541	11034543	11:T>C	TGCAGCAGAAGTCTTGTTGTTCTCAATGGACAGAAAGCATGAGATCGGAAGAGCGGTTCAGCAGGAATG
	542	11034598	5:T>C	TGCAGTAGGGACCCTTGTTGCCAGGCAGTGCAGTAAAGTGCATGAGATCGGAAGAGCGGTTCAGCAGGA
	543	11034622	11:C>G	TGCAGCATAAACACTGGCTCCTGTAAAATTCACAGCATAAGCATGAGATCGGAAGAGCGGTTCAGCAGG
	544	11034629	49:A>T	TGCAGCATACATCATTGGGAGATAATTTCTCACCATGCTTAATTACATAATGTGCATGAGATCGGAAGA
	545	11034695	16:T>G	TGCAGCCAATCGCACGTAATCAAGCATGAGATCGGAAGAGCGGTTCAGCAGGAATGCCGAGACCGATCT
	546	11034699	33:C>T	TGCAGCCACCAACTCATTACACCAGGATCTGGGCACTGACAGGAGCCCTGAAGCATGAGATCGGAAGAG
	547	11034731	26:G>T	TGCAGCCATAATGTCCCTCAATGTAGGCTCAGGATCATTGTCTGCATGAGATCGGAAGAGCGGTTCAGC
	548	11034753	28:C>A	TGCAGCCCAGTTACTGTTACACCCATGGCTTAAGACTTTGCAGCATGAGATCGGAAGAGCGGTTCAGCA
	549	11034755	37:C>T	TGCAGCCCATGATTGTGTAGCCCAGTCGTTGCCACATCTACTGAGCATGAGATCGGAAGAGCGGTTCAG
	550	11034838	11:C>T	TGCAGCCTTATCAGTCACATTGTTCTCAGCTGAGGACTTAGGCATGAGATCGGAAGAGCGGTTCAGCAG
	551	11034858	6:G>C	TGCAGCGCACGTGCACAATGCACATCAGCCACACGCGTTATGCAAAGCATAACATGCATGAGATCGGAA
	552	11034862	5:C>T	TGCAGCGCAGTGTAAACACATGCAATATCTCACAGCATGAGATCGGAAGAGCGGTTCAGCAGGAATGCC
	553	11034878	23:C>T	TGCAGCGCTCAATGCTCTTTTAGCCAGACGCATGAGATCGGAAGAGCGGTTCAGCAGGAATGCCGAGAC
	554	11034981	16:T>A	TGCAGCTCACTAAACATTGGGAATGCGTCTTTCACTATAGCATGAGATCGGAAGAGCGGTTCAGCAGGA
	555	11034987	8:A>T	TGCAGCTCAGCATTCTGTGAGAGTGACTGTGCATGAGATCGGAAGAGCGGTTCAGCAGGAATGCCGAGA
	556	11035045	30:A>G	TGCAGCTCTTGTGTATTTGAGACAGAAAACAGCATGAGATCGGAAGAGCGGTTCAGCAGGAATGCCGAG
	557	11035071	25:C>G	TGCAGCTGCTACAAGCGAGAACGCACCGCCTCAGGCTGTGAGTGCGCATGGGGAGCATGAGATCGGAAG
	558	11035083	19:T>C	TGCAGCTGCTGTTCACACATATTGTGTGCATGAGATCGGAAGAGCGGTTCAGCAGGAATGCCGAGACCG
	559	11035186	10:T>A	TGCAGGAAAATAAACGCATACTGGCATTTGGTATGCATGAGATCGGAAGAGCGGTTCAGCAGGAATGCC
	560	11035186	33:T>G	TGCAGGAAAATAAACGCATACTGGCATTTGGTATGCATGAGATCGGAAGAGCGGTTCAGCAGGAATGCC
	561	11035198	17:G>T	TGCAGGAAATGGATATAGTGGGTCGACGGGTTCAGATATGATGCAAAGACAAATAGCATGAGATCGGAA
	562	11035228	12:C>G	TGCAGGACAGTGCCATTTCATCTTCGGCTTGCTGACATCTGTGCATGAGATCGGAAGAGCGGTTCAGCA
	563	11035282	47:C>T	TGCAGGAGGAGTTTGGGCTGAAGGAGATGGCAGCAGACTTAGTTTACCGATTTGAGCATGAGATCGGAA
	564	11035341	15:A>C	TGCAGGCAAGACACAATCCTCACCTGCTTGCCACCATGCATGAGATCGGAAGAGCGGTTCAGCAGGAAT
	565	11035401	17:A>T	TGCAGGCATATTTCAGAAATCACCACTCAGTCTGTGACGTCGTATGACTGCATGAGATCGGAAGAGCGG
	566	11035415	17:A>T	TGCAGGCCAGTGCATCCAAAGTGCAGCATGAGATCGGAAGAGCGGTTCAGCAGGAATGCCGAGACCGAT
	567	11035479	44:G>T	TGCAGGCTGAGTGAGTTATGTGTAGACCAGCTAGTGTCCTCTACGAAGCATGAGATCGGAAGAGCGGTT
	568	11035529	35:C>G	TGCAGGGACCGCTATTTAACAGAGGCCAACTACTACAAGGCATGAGATCGGAAGAGCGGTTCAGCAGGA
	569	11035664	31:A>G	TGCAGGTATTGTGATTTCACTTGGTTGAGAAACAGGACTGGTGAGTGGTGGTGAGGCATGAGATCGGAA
	570	11035665	29:C>T	TGCAGGTATTTTCTTGGGAAAAAGGGAAGCAATGTAATTTTCTGCATGAGATCGGAAGAGCGGTTCAGC
	571	11035669	24:T>C	TGCAGGTCAAAAGCACCTGTTGAATAAAGTCTAATGATCGCAAAAGCATGAGATCGGAAGAGCGGTTCA
	572	11035673	20:C>A	TGCAGGTCAGAGGAGTCAGCCAGGCTGCGGTAAGTCATGGAACTAAGTGGGCATGAGATCGGAAGAGCG
	573	11035700	22:C>T	TGCAGGTCTCCTCTGCTCTGTGCAGTCCTCTATTACATCAGCATGAGATCGGAAGAGCGGTTCAGCAGG
	574	11035706	17:A>G	TGCAGGTCTGGTGGGGTAGAGGAAAAGGCATGAGATCGGAAGAGCGGTTCAGCAGGAATGCCGAGACCG
	575	11035730	14:G>T	TGCAGGTGCAGTGTGGGAACGATTTCCAGTGTGTGCAGCATGAGATCGGAAGAGCGGTTCAGCAGGAAT
	576	11035784	12:C>T	TGCAGGTTCACTCTACACTCCAGAATTTGTGCATGAGATCGGAAGAGCGGTTCAGCAGGAATGCCGAGA
	577	11035891	22:G>A	TGCAGTACAACTATGGCAGCTGGTCGGCAACCAGTTAAGGTAGGCATGAGATCGGAAGAGCGGTTCAGC
	578	11035894	34:T>C	TGCAGTACAAGTTTCACTGTAGAATTTTCCCATGTGATTGCAGATCCTATAGCATGAGATCGGAAGAGC
	579	11036025	22:C>T	TGCAGTATCATGTAGTTTGCAGCGTGAAAATGCATGAGATCGGAAGAGCGGTTCAGCAGGAATGCCGAG
	580	11036028	10:C>T	TGCAGTATCTCTCCGATCCCATCCTGATTTTAGCATGAGATCGGAAGAGCGGTTCAGCAGGAATGCCGA
	581	11036028	11:T>A	TGCAGTATCTCTCCGATCCCATCCTGATTTTAGCATGAGATCGGAAGAGCGGTTCAGCAGGAATGCCGA
	582	11036125	48:C>T	TGCAGTCATGTGACAGCTTTGTCTTCTTCATCTCCTCCTTCCCCATAGCGGTGAGCATGAGATCGGAAG
	583	11036160	40:G>T	TGCAGTCCGCAGTGTTCACTGGATTTCCCACTGACTTTGAGGCGCATGAGATCGGAAGAGCGGTTCAGC
	584	11036226	19:A>T	TGCAGTCTCTAAGCCAATGAGGAGGGAGAGAGCCGAACGAGCCACTGCTCTCATGCATGAGATCGGAAG
	585	11036244	20:G>A	TGCAGTCTGAGTATGAATAGGATGAAAATGACCTGGTGTAACCATAGCATGAGATCGGAAGAGCGGTTC
	586	11036289	9:C>T	TGCAGTGAACACTGGTGATCCTGCTACACAGATAAGAAGCCCTGAACAATCAGCATGAGATCGGAAGAG
	587	11036291	38:T>C	TGCAGTGAACCACAGGAGCAACCGCAACAGCATGTGGTTTGGCATGAGATCGGAAGAGCGGTTCAGCAG
	588	11036337	11:A>T	TGCAGTGAGTCATAGCCAGCTTCACACAGTAAGCATGAGATCGGAAGAGCGGTTCAGCAGGAATGCCGA
	589	11036342	6:G>T	TGCAGTGATTAGTTGCTTGGCATGAGATCGGAAGAGCGGTTCAGCAGGAATGCCGAGACCGATCTCGTA
	590	11036348	11:T>C	TGCAGTGCAAATCACATGACCTGCGTGCTTTGGCCAATAACAGCATGAGATCGGAAGAGCGGTTCAGCA
	591	11036373	17:G>T	TGCAGTGCATAAATACTGACAGCACACAAGCTAACAACATGCATGAGATCGGAAGAGCGGTTCAGCAGG
	592	11036414	7:C>T	TGCAGTGCGTTTTCAAAGTGGTGCAGAAATAGCATGAGATCGGAAGAGCGGTTCAGCAGGAATGCCGAG
	593	11036448	15:C>T	TGCAGTGCTTGTGCTCTTAACAGGGAGCATGAGATCGGAAGAGCGGTTCAGCAGGAATGCCGAGACCGA
	594	11036455	32:T>A	TGCAGTGGAAGTCTTTGCAGCCACGGACAAAGTCGCTGCCATCTTGGATGCATGAGATCGGAAGAGCGG
	595	11036530	25:G>A	TGCAGTGTATAGGCTGGTGAGAACCGGCCCTAAGGGATGCATGAGATCGGAAGAGCGGTTCAGCAGGAA
	596	11036543	10:A>C	TGCAGTGTCCAAAAGCTTCAGCATGAGATCGGAAGAGCGGTTCAGCAGGAATGCCGAGACCGATCTCGT
	597	11036574	12:T>C	TGCAGTGTGGAGTCTACAGTGTTCCATGGCATGAGATCGGAAGAGCGGTTCAGCAGGAATGCCGAGACC
	598	11036589	32:T>G	TGCAGTGTGTCAAGGTAAAATGACTGTACTAGTGAAGCATGAGATCGGAAGAGCGGTTCAGCAGGAATG
	599	11036634	22:G>T	TGCAGTTAAGAATCGCTTACAGGTCATATCAGCATATTCTTTGTATGCACATGCATGAGATCGGAAGAG
	600	11036647	29:C>A	TGCAGTTACCAGAACTACTCAGCAATCTGCCTTCCCTGACAACTAGTGGCATGAGATCGGAAGAGCGGT
	601	11036688	34:C>T	TGCAGTTCCTATCTCTGACTTGTAAGAGACTCCACAGTGGAAGCACAAGCATGAGATCGGAAGAGCGGT
	602	11036706	28:G>A	TGCAGTTCTAGCTTCTGCTGATATAGACGATGTGCAACCCTGTCTGGGCACAGCATGAGATCGGAAGAG
	603	11036730	32:G>C	TGCAGTTGCAGGACACTTGCCATAATGTGTAAGTGTGCTGCGCATGAGATCGGAAGAGCGGTTCAGCAG
	604	11036754	21:A>T	TGCAGTTGCTTCCTCCTGGCTATGAGGTGTGGCTCCCAGCATGAGATCGGAAGAGCGGTTCAGCAGGAA
	605	11036767	13:G>A	TGCAGTTGGTGATGAAGAACTATAGCGCATGATGGGTTTAATGTAATACATGCATGAGATCGGAAGAGC
	606	11036793	20:T>C	TGCAGTTGTTTGCACCAATGTACAATTTAGCATGAGATCGGAAGAGCGGTTCAGCAGGAATGCCGAGAC
	607	11036822	9:A>G	TGCAGTTTGACTTGACTGCCTCAGCTGTTCATATGATGCATGAGATCGGAAGAGCGGTTCAGCAGGAAT
	608	11036827	8:G>T	TGCAGTTTGCAGTTCGGATTGCTATTTCCAATACTTGGCTCAGAATTTAGGCATGAGATCGGAAGAGCG
	609	11036849	10:T>C	TGCAGTTTGTTGTGCTGTCTGTGGGCTTAGCAGTGCTGGATACTAACAAAGCATGAGATCGGAAGAGCG
	610	11036851	9:T>A	TGCAGTTTTTAAGTTGAAACATGCTGCATAAGTTTGCATTGCATGAGATCGGAAGAGCGGTTCAGCAGG
	611	11036860	21:C>T	TGCAGTTTTAGTAAATCAACCCCAATGTGTTGCATGAGATCGGAAGAGCGGTTCAGCAGGAATGCCGAG
	612	11036874	48:T>C	TGCAGTTTTGATGGAAGTGAATGGGCCTGCGCAAGGCAACACAGAAAATGCAGCATGAGATCGGAAGAG
	613	11036879	5:T>G	TGCAGTTTTGGCATGGTTTCAGAAAGCACACCCAAGATGCAGCATGAGATCGGAAGAGCGGTTCAGCAG
	614	11036914	26:C>T	TGCAGACTAAATTTTAACCAGACCATCGTGCTTTATAGCATGAGATCGGAAGAGCGGTTCAGCAGGAAT
	615	11037306	51:C>T	TGCAGAATTATCCTCTGAACCAGCAGTGCTCCCTAAGCATTGAAGGGGCTACGCATGAGATCGGAAGAG
	616	11037335	7:C>A	TGCAGATCGGCTTGGGTGCCCCAGTAGCAAGCTGCATGAGATCGGAAGAGCGGTTCAGCAGGAATGCCG
	617	11037353	24:C>G	TGCAGCCAAGTGAGAGGCCCTCCACTATCAGGACCAGCATGAGATCGGAAGAGCGGTTCAGCAGGAATG
	618	11037406	32:G>T	TGCAGGTAACTCTTCCAATAGTTGTTGTCAAAGTGCATGAGATCGGAAGAGCGGTTCAGCAGGAATGCC
	619	11037427	38:T>C	TGCAGGTTGAGATTGAGTAGACCAGCTGGAATCCTCTGTGGAGCATGAGATCGGAAGAGCGGTTCAGCA
	620	11037430	16:A>T	TGCAGGTTGAGATTGTATACACCAGCTGGTGTTCTCTACTGAGCATGAGATCGGAAGAGCGGTTCAGCA
	621	11037431	7:C>A	TGCAGTACCCATTGGACAGCAGGGAGGAGCATGAGATCGGAAGAGCGGTTCAGCAGGAATGCCGAGACC
	622	11037437	20:G>A	TGCAGTCCCTGCCTGGTCCTGGACATTGGTAAGCATGAGATCGGAAGAGCGGTTCAGCAGGAATGCCGA
	623	11037442	17:T>C	TGCAGTCTGAGATTGTGTAAACCAGCCACTTCCACATCTACTGAGCATGAGATCGGAAGAGCGGTTCAG
	624	11037443	9:A>T	TGCAGTCTGAGATTGTGTAGACCAGCTGTTGGCATCTACTGTGCATGAGATCGGAAGAGCGGTTCAGCA
	625	11037502	22:G>A	TGCAGAAACGACATCTCTTTTGGGGGGCTCGGTTGGTAGGGGTACCAGGAACAGCATGAGATCGGAAGA
	626	11037509	9:A>G	TGCAGACACAACATCTTTTTGGGGGGCTCGGTTGGTAGGGGTACCAGGAAAGGCATGAGATCGGAAGAG
	627	11037518	9:G>A	TGCAGACATGATACAAGAGATGGTCAGAGACCACAGGCATGAGATCGGAAGAGCGGTTCAGCAGGAATG
	628	11037522	26:C>G	TGCAGACTTGGGCTGTGCAATCTGCTCATCAGTTGCTTGAGCATGAGATCGGAAGAGCGGTTCAGCAGG
	629	11037524	38:G>A	TGCAGACTTTAGCCATGCAATCTGCTGATCAGTTGCTTGAGCATGAGATCGGAAGAGCGGTTCAGCAGG
	630	11037574	11:A>G	TGCAGCCTGAGATTGTGTACACCAGCCATCGCCACATCTACTGAGCATGAGATCGGAAGAGCGGTTCAG
	631	11037607	31:C>T	TGCAGGACCATTCACAAGGTGCAGCGTGGGTCATGCATGAGATCGGAAGAGCGGTTCAGCAGGAATGCC
	632	11037618	22:T>A	TGCAGGCTGAGATTGTGTAGACTAGCTGGTGTCCTCTGCCGAGCATGAGATCGGAAGAGCGGTTCAGCA
	633	11037639	24:G>A	TGCAGGTGTGGTGTGTTTTCAAAAGTCCTGCATGAGATCGGAAGAGCGGTTCAGCAGGAATGCCGAGAC
	634	11037647	11:T>C	TGCAGTACCCATGTGATGACAGGGAGCATGAGATCGGAAGAGCGGTTCAGCAGGAATGCCGAGACCGAT
	635	11037651	9:G>A	TGCAGTCAGGTCAACGAGCATGAGATCGGAAGAGCGGTTCAGCAGGAATGCCGAGACCGATCTCGTATG
	636	11037658	21:A>T	TGCAGTCAGGTTGAGACTACGATGAGGGCGACGAGCATGAGATCGGAAGAGCGGTTCAGCAGGAATGCC
	637	11037684	36:C>T	TGCAGTGTCCTTCCTGGATTCTGTACATGCTGGCTACGCAGCATGAGATCGGAAGAGCGGTTCAGCAGG
	638	11037694	5:T>A	TGCAGTTGTGTGAGATCGGCAGATGCATGAGATCGGAAGAGCGGTTCAGCAGGAATGCCGAGACCGATC
	639	11037842	9:G>A	TGCAGACAGGCGGCCTGTGTAAGCAACATACCTGTACGTCGCTGCCTACTTCTAGGTTTAGAGCATGAG
	640	11037888	10:A>G	TGCAGACGGAAATCTCGTGATAAGAGATCTCACGTCACTGAGTTAAATCAAGCAGCAGCAAAAGCATGA
	641	11037924	42:C>T	TGCAGACTTGCATATCAAACACAGGAAAACAATGCCAATCTTCACGAGCACACACTGAGTTAGCATGAG
	642	11037928	10:C>T	TGCAGACTTTCTTCTCGATCCTTGAAGGATCCCAGTGCTGGACAGCCAGTTGGAAATGTGCACAGCATG
	643	11037976	17:G>A	TGCAGAGCTGGTTGGTTGGGCAGACACCTTCACTTTCAAAGAGCTGTGGCAGTGGAAGCATGAGATCGG
	644	11038119	52:A>T	TGCAGATCTCTCTCCTGTGACTCAACGCCGGATGAGAGCACCGCTGCTTCCCATCTAATGGCTTTGGGG
	645	11038136	10:G>T	TGCAGATGCAGGTTTCCTGGCTGTCATGTTTATCTTGCTTCTGTGACCTTTACCAGGAACCAGCATGAG
	646	11038196	55:A>G	TGCAGCAAAAAGCTCTGCACCTGACCCAGCTGCTCATACAGCCTGTTACATGCTGACAAAAAGCATGAG
	647	11038270	15:G>A	TGCAGCAGAGCTCACGCTGGAAGAATTAGAAGCAGCACAGATAATCCTTCTGGGGCAGAACAAGGAGCA
	648	11038321	11:C>A	TGCAGCATTAGCAAGCCAATTCAAGAAGCCCATACCTTTTTAGGAGGTTTGCCAGAGTCTTGCATGAGA
	649	11038332	64:C>G	TGCAGCCAACACTGATCCTCTTAGGAAAATGCTAGCAGCCTGGCTCTCTCTGGCTTCCCGACTTCTGAC
	650	11038366	26:G>A	TGCAGCCATTTGATGGCTTGACAGTTGGGTTGAGAACACAGCTAGATGTGACAGTTAGCAATCTAAGCA
	651	11038372	54:C>T	TGCAGCCCACTCAGGGATACCCAGAGCACACACATTATTGCGGTGCAGTCTATTCTCTAAGTCATCTAA
	652	11038503	26:C>T	TGCAGCTCAGGGATTTGTGGCCAAAGCCATGCAATTCCTCCCAGATACTGACCACAGAGGCTCTAAGCA
	653	11038511	20:C>A	TGCAGCTCATTGTGGGTTGGCACAGGATGCACCATGGTCTCTGTCCTTGGGATAGATTTGCCTAATGTA
	654	11038603	23:T>A	TGCAGCTTAGCAACCAATGATGGTGTACAACTGACAGCTTCCTACCAACCAAGGTTGTTGTACAGTCTG
	655	11038644	25:T>A	TGCAGGAAGAGAGGGGGCATCATCCTGTTTCTGTGGAAGTGGAAAGGCTATGGGCCTGAGGAATGCTCC
	656	11038699	55:C>T	TGCAGGCAGCAAGCCATGCTGCTCAGTAACACACAGCAGGATAGGTAGGTTACAGCCTTATAAATGCAA
	657	11038763	42:G>A	TGCAGGCTGACCTGCTGATTGCCTGGCTTCCTTGGTTTTTGAGTCACTGAATAGATATAGCATGAGATC
	658	11038967	17:A>C	TGCAGGTTGCTCGGGCTAAACAGAAAGGTAGTACATTACACATAGGGGTGGTTGTGTTTTAGGTGGTTG
	659	11038985	68:A>T	TGCAGGTTTTTCCCCATTAATACAGCATACACTTCATCTTGGTTAGGTGTAACACAGCAGAAGCCCAGA
	660	11038987	56:A>C	TGCAGTAAAAACACTGTGTCATCTGTGCATATCTGTGCACAGAGCCTAAGGGGTTGATTTACTAAAGCT
	661	11038994	50:C>T	TGCAGTAAAATGCATCAGCATCAATCCCATCATCCAGGACTTCCTACTGCCAGGAGAAAACTGAAATAC
	662	11039043	32:C>G	TGCAGTACACAGAAACATGTTGAACGGTATTGCTATCCCATGAATGAATCACCTCAAAGCATGAGATCG
	663	11039098	59:G>A	TGCAGTAGAGGGAGTTCCAGGTGCTGGGAGAACAGTATATTAAGTATTTTCTTCACCGTGTCAGCATGA
	664	11039100	11:C>T	TGCAGTAGCAACAGCAGAAAATACAGTAGAGAAGCCTACAGGGTAGGAAAACACACAGGCGTGCATGAG
	665	11039240	30:G>T	TGCAGTCCATAACTCTCTTAATACAAGCAAGGACTTTGCTTGCTTCGGAAACTGCTGCTTGGCATTGCA
	666	11039267	62:C>T	TGCAGTCCCTGTACAGTAGGGAAGAGTAAAAATCACAAGCTGCCAATCAGTTCACATGCTGACAAGAAG
	667	11039320	54:G>A	TGCAGTCTCTGACCATCTCCTGTATCATGTCTTCGGTCTCTGACCATCTCCTGTGTCATTGTCTGCATG
	668	11039360	31:G>A	TGCAGTCTTTAAAAGGCCTGTAAAGTGGAGCGGTGACTTAACTACATCAAGTTAGGCAGAAGCATGAGA
	669	11039381	59:A>C	TGCAGTGAAGTAGACTGCACCTGCCTACACATGCACACATGGTGGGCCATAAAATCTTAAAGCATGAGA
	670	11039384	26:C>A	TGCAGTGAATATAACATGAGGCATATCATTTGAGTGATTCTTATGTGTGCAATGTGCTGTGCATGAGAT
	671	11039429	38:T>A	TGCAGTGCACACTTTTACTAAGAATCCGATTCAGTGCTTGTCTGAGGGTGCTGAATATGCCTTTCCATT
	672	11039449	30:G>A	TGCAGTGCAGCCTAATATGTTGGGTGAAGGGGATGCTATGGGTAAGTGACGGGGGAATGGGCACTGGCA
	673	11039537	24:T>A	TGCAGTGGATCATCACCTATTTTGTCCCAAAATAGGCTGAACCGCTGTGCTGCATAAGCATGAGATCGG
	674	11039550	10:A>G	TGCAGTGGCTAAACATGCAGTAGAGGGCCATCAATGAGTACCTCAGCTTTTTGGTGGTGAACCATGACA
	675	11039615	29:A>T	TGCAGTGTCTTCTCTCCAAAGCTCTGGCAATTGTCAAACTGACATCATCAAGACCAACATAGAGCCCAT
	676	11039698	31:C>T	TGCAGTTACCATGGTGCTGCACATGTGATGACTCCAGCCATTTTATGAATTGACAGTTTGATTGAGAAC
	677	11039907	43:G>A	TGCAGTTTACAATCACATGGGGTAGTTATCTCCTTCCCTCTTAGGGAGGATTTCAAAGACTTTCATAAT
	678	11039921	36:C>T	TGCAGTTTATAGGGATCCTCTCTGTCCCCATTCACCCCTACACATGTGCGTTACCATGCATGATGCATG
	679	11039971	7:T>C	TGCAGTTTTCTAAAGATTCTGTTAGATGCTGCATTTTCTGAAAGCGCACCAAAGATGCAGCATGAGATC
	680	11040324	12:C>T	TGCAGAAGGATCCGCAAGGGGCTTGAAGGTGACGGGGCAGAGGCATGAGATCGGAAGAGCGGTTCAGCA
	681	11040324	34:G>A	TGCAGAAGGATCCGCAAGGGGCTTGAAGGTGACGGGGCAGAGGCATGAGATCGGAAGAGCGGTTCAGCA
	682	11040356	27:C>T	TGCAGAATGTAAATGGACATTAGCACACATTTGTGCGCAATCACGTGCATTTGCATGAGATCGGAAGAG
	683	11040382	11:G>A	TGCAGACAAGGGAACAGGGATGTGCACTAGAAGCATGAGATCGGAAGAGCGGTTCAGCAGGAATGCCGA
	684	11040532	13:A>C	TGCAGAGAAAGGCATGTGTGTTCGAGCTTTGGGGTGCACACCTATGCATGAGATCGGAAGAGCGGTTCA
	685	11040589	9:C>G	TGCAGAGCACGGTGACATGCTAAGAAGAGAAAGGATATTTCCAGCATGAGATCGGAAGAGCGGTTCAGC
	686	11040591	10:A>C	TGCAGAGCATAATTTGGTACCATGTCAGTCCTGACATCTCAGAGGCAAGCATGAGATCGGAAGAGCGGT
	687	11040602	21:C>T	TGCAGAGCTCATGGAAGCAGGCTGGGATATGAAACAGAAGCATGAGATCGGAAGAGCGGTTCAGCAGGA
	688	11040620	46:A>G	TGCAGAGGAACTACAATTCCCAGCCTGGGCATTGAGCCAGAGATTGACGGCATGAGATCGGAAGAGCGG
	689	11040694	25:C>T	TGCAGATACCAGGTGCTAGGGTCAGCTTGCTTCTCCCAAATTAGCATGAGATCGGAAGAGCGGTTCAGC
	690	11040720	15:A>T	TGCAGATATGGAAACACTTAGCATGAGATCGGAAGAGCGGTTCAGCAGGAATGCCGAGACCGATCTCGT
	691	11040750	19:T>C	TGCAGATCCTGACTTGGAATGAACAGATGCACAGCTCCTGGGCTTTGCAGCATGAGATCGGAAGAGCGG
	692	11040755	35:G>A	TGCAGATCGCAAGTGCAGTACATTTTGAACACAGTGCGGGAAATGCATGAGATCGGAAGAGCGGTTCAG
	693	11040781	36:T>C	TGCAGATGCTGAGCACATAGGGGCTGGTCATCTATGTAGTTGCATTACTGCATGAGATCGGAAGAGCGG
	694	11040786	36:C>T	TGCAGATGGGTCCTGTACCCTGCCCAAGGGCTTTTTCACGCATCTGTCCAGCATGAGATCGGAAGAGCG
	695	11040828	26:C>T	TGCAGATTGCACAGCTAAAATCTACACACCCCATGAAAGCATGAGATCGGAAGAGCGGTTCAGCAGGAA
	696	11040881	48:T>C	TGCAGCAACTAGCTGCATGTTTGCAGTGATGTGAGAAGTGTGTGTAAATGCATGAGATCGGAAGAGCGG
	697	11040911	5:A>C	TGCAGAACACCTGCATCTGCTGTCCTGCATCTGCTGCATGAGATCGGAAGAGCGGTTCAGCAGGAATGC
	698	11040952	21:T>A	TGCAGCAGACAGATTTGTAGTTTTAATGGACTGTGAGCATGAGATCGGAAGAGCGGTTCAGCAGGAATG
	699	11040961	31:G>A	TGCAGCAGATGGCAGTTAGCTGCATGATTACGTCATTGGTGCATGAGATCGGAAGAGCGGTTCAGCAGG
	700	11040962	46:G>A	TGCAGCAGATGTCAGTGTTAACTTAACAACACCTCAAATGCAGGTCGCAAAGTAGTGCATGAGATCGGA
	701	11041044	5:C>A	TGCAGCATTGGGCTATGGAGGGGGTGGGGGAAGCTGGTTCAAGCTATCAGTAGCATGAGATCGGAAGAG
	702	11041044	43:C>A	TGCAGCATTGGGCTATGGAGGGGGTGGGGGAAGCTGGTTCAAGCTATCAGTAGCATGAGATCGGAAGAG
	703	11041045	14:T>C	TGCAGCATTTCAAGTATCCCCGCTCAGCATGAGATCGGAAGAGCGGTTCAGCAGGAATGCCGAGACCGA
	704	11041133	39:G>C	TGCAGCCGCCCCCGGACTTGTGTGAACCGGCTCCATTGAGAGCATGAGATCGGAAGAGCGGTTCAGCAG
	705	11041366	19:C>T	TGCAGCTGCTGGCAAGCTACACATCCTACATCTACATCATATGGCATGAGATCGGAAGAGCGGTTCAGC
	706	11041385	19:C>G	TGCAGCTGTCAATCACAGCCAGTGAAGAGGGAGTGGGGGCGCACGCTCGGGAGTGAGCATGAGATCGGA
	707	11041393	26:C>A	TGCAGCTGTGAGTTGTTGCCACCTCACCTGGCTGTATTTAGGACAACAGTGCATGAGATCGGAAGAGCG
	708	11041404	10:A>G	TGCAGCTTACACATATGTTTGCAATTGTGTGCATGAGATCGGAAGAGCGGTTCAGCAGGAATGCCGAGA
	709	11041470	29:G>C	TGCAGGACAATATTTAGTTAGCTTTGTTAGCTGTGGCTTGGCATTGCATGAGATCGGAAGAGCGGTTCA
	710	11041497	32:C>T	TGCAGGAGAGCAAGGCGTGGAGTCTCGAGTCACCGGTGGGAGGAGGTGCATGAGATCGGAAGAGCGGTT
	711	11041631	30:C>T	TGCAGGCGGCTGGTAGCTCTCAATGGACTACGAGTGTACTGATCAGCATGAGATCGGAAGAGCGGTTCA
	712	11041636	18:A>G	TGCAGGCGTCCAACAACTATGTGCAATGTACATTGTAGTGGCATGAGATCGGAAGAGCGGTTCAGCAGG
	713	11041645	31:C>T	TGCAGGCTCAATCACAAAGCACAGTGCAGCTCGTGCATGAGATCGGAAGAGCGGTTCAGCAGGAATGCC
	714	11041658	43:C>T	TGCAGGCTCCTCTGTTTGATGATGGCACCGCCCCTTGTGATGTCACCGACCCAGCATGAGATCGGAAGA
	715	11041686	12:G>A	TGCAGGGAAATGGAGCATATTGATTTGCATTAGAAACGTGCATCAATGCGCAAGAGGCATGAGATCGGA
	716	11041822	19:A>G	TGCAGGTGACAGCCTGGTCAGTATGTTGGGAGCATGAGATCGGAAGAGCGGTTCAGCAGGAATGCCGAG
	717	11041853	25:T>C	TGCAGGTGGTGAGGTCCCACTGATCTGGAGGCATGAGATCGGAAGAGCGGTTCAGCAGGAATGCCGAGA
	718	11041861	7:G>A	TGCAGGTGTTCACATGTAGGAGGAACGGGAGTGAGCATGAGATCGGAAGAGCGGTTCAGCAGGAATGCC
	719	11041879	21:T>C	TGCAGGTTATGTAAATTAGAGTCAAGGCATCCTTATCTATGGACAGATAAGCATGAGATCGGAAGAGCG
	720	11041895	17:T>C	TGCAGGTTGTCAATCTGTTCCCCAAGCTCAGCAACACTGTCAGCATGAGATCGGAAGAGCGGTTCAGCA
	721	11041920	14:C>A	TGCAGTAAACTCTTCATTTTTGATGTGAGATTAGCATGAGATCGGAAGAGCGGTTCAGCAGGAATGCCG
	722	11041969	33:T>A	TGCAGTACAAGCACGCTCTAAGTACCACTTGTATGTAATAACTCAGCTCAATATTGCATGAGATCGGAA
	723	11041984	9:G>A	TGCAGTACAGATTTGAATACCTAGGTATTGACTATAAAAGGTTAGCATGAGATCGGAAGAGCGGTTCAG
	724	11042039	18:T>C	TGCAGTAGGGTACATGGTTCAGCTATCCAAGGACCTCTGGGCTCTAATGGCATGAGATCGGAAGAGCGG
	725	11042042	35:A>T	TGCAGTAGTATCACACAAGCAGTATTGGCCCATGCAGCTGGGAGGCACAGATGAAGCATGAGATCGGAA
	726	11042099	6:T>C	TGCAGTTACATGCGCATTTCCACAACACACAGCAAGCATGAGATCGGAAGAGCGGTTCAGCAGGAATGC
	727	11042138	7:C>T	TGCAGTCCACATCCCAGGAGTGGACACTTGGCATGAGATCGGAAGAGCGGTTCAGCAGGAATGCCGAGA
	728	11042157	10:A>T	TGCAGTCCTCATCAAAAACCTGCACTGAGAGGAATGAAGGCGTAGCAATGCATGAGATCGGAAGAGCGG
	729	11042197	30:G>C	TGCAGTCTCTGACCATCACTTGCAACATGTGTAATGTTTCTGGTCAACTTTTGCAGCATGAGATCGGAA
	730	11042205	30:C>T	TGCAGTTGCTGTCAGAGAAGTGGTCCTCTCCGAGGTTTTGCATGAGATCGGAAGAGCGGTTCAGCAGGA
	731	11042258	34:C>T	TGCAGTGACGTCCTCCAGTCTGTTTGTCCATGCACGGCATGAGATCGGAAGAGCGGTTCAGCAGGAATG
	732	11042278	22:G>A	TGCAGTGCAAATCACATGCGATGTGCATGAGATCGGAAGAGCGGTTCAGCAGGAATGCCGAGACCGATC
	733	11042290	8:A>T	TGCAGTGTAGCTGGTTCTCTTGTGCATGAGATCGGAAGAGCGGTTCAGCAGGAATGCCGAGACCGATCT
	734	11042362	17:C>T	TGCAGTGGAAGACTTGTCCTCCCGCTCTCTAAAGTGTGCATGAGATCGGAAGAGCGGTTCAGCAGGAAT
	735	11042364	9:C>T	TGCAGTGGACACCTATCAGGACTTTTGCTTGTTCATCCTTGCAAGCATGAGATCGGAAGAGCGGTTCAG
	736	11042390	10:G>C	TGCAGTGGCTGTGGCTGCACCAATAGATGGGCTACAACTCAGCATGAGATCGGAAGAGCGGTTCAGCAG
	737	11042407	26:A>T	TGCAGTGGTAGCATTAAAGTGAACCTAGCAAATCACAGGCATGAGATCGGAAGAGCGGTTCAGCAGGAA
	738	11042439	44:A>G	TGCAGTGTGAACCCAGCCTGAGTCAGTTGTGGGCTGAATGAGAGAAATCTATGCATGAGATCGGAAGAG
	739	11042454	8:G>C	TGCAGTGTGCTGCGATAACAGCATGAGATCGGAAGAGCGGTTCAGCAGGAATGCCGAGACCGATCTCGT
	740	11042480	35:G>T	TGCAGTGTTGAAGAGGGACACTTTACAATATAATTGTGCCATGAGGCATGAGATCGGAAGAGCGGTTCA
	741	11042521	37:C>T	TGCAGTTGGGGTGCCATTAGCAATACATTGGTACCCACGTGCAGATCATGAGTGCAGCATGAGATCGGA
	742	11042541	10:T>G	TGCAGTTCACTCTGGAGGGACTACATGTCCCAGCATGAGATCGGAAGAGCGGTTCAGCAGGAATGCCGA
	743	11042588	14:A>G	TGCAGTTGTGTGCAATTACTGGCCTCTATTTGTGTGCTAGCATGAGATCGGAAGAGCGGTTCAGCAGGA
	744	11042637	16:A>G	TGCAGTTTTACTGAACAGGTGCTTCACTGGCTTACAATTAGCATGAGATCGGAAGAGCGGTTCAGCAGG
	745	11042882	33:C>T	TGCAGACATGCTACCAGTGATGGTCAAAGATCGCAGGCATGAGATCGGAAGAGCGGTTCAGCAGGAATG
	746	11042917	47:C>G	TGCAGATAGACCACTGCTTCCACACACACAGCAAGGGTCCATCTTTGCAGCATGAGATCGGAAGAGCGG
	747	11042931	19:G>A	TGCAGCCTACGATTGTGCAGACCGGCTGTTGACATCTACTGAGCATGAGATCGGAAGAGCGGTTCAGCA
	748	11043134	9:G>T	TGCAGGTGCGGTGCGTTTTATAAAGTCCTGCATGAGATCGGAAGAGCGGTTCAGCAGGAATGCCGAGAC
	749	11043169	18:C>T	TGCAGTGTCCTTCTTCCTCCATTTCGTGCATGAGATCGGAAGAGCGGTTCAGCAGGAATGCCGAGACCG
	750	11043582	13:A>G	TGCAGATCTTTGGAGCTGCACAACATTGATGCTAGCAGATGGGTGGTATCTCTGCACTATCCAATGCAT
	751	11043766	44:G>T	TGCAGCATTTACTGGCTGCTTGTGCTGCTTCTCCACAATGATGAGCTCAGCTCTCTGACACTCTGCTCT
	752	11044316	33:C>A	TGCAGTAAAACCTGGCGGGAGTTCAAATCCTTCCCCACTTATGAGGCCTGGCTAGTTCTTTGCATGAGA
	753	11044338	29:A>G	TGCAGTAAGGCAGGATGCTCAAGCTGTTCACTGCTGTCCTTCAGGGTGTCTGGGTTGGTGAGTCTGTAA
	754	11044384	9:C>T	TGCAGTACTCCCTGCGCCTCCCTCTGAGTTCACAGGAGCTGGAACTACAGAGGAGGAATCGGGTATCAA
	755	11044384	14:C>T	TGCAGTACTCCCTGCGCCTCCCTCTGAGTTCACAGGAGCTGGAACTACAGAGGAGGAATCGGGTATCAA
	756	11044481	46:G>C	TGCAGTCACCAATGCTCATGTTCCCTGCTGATTACAATACTGTAGTGATGTGTATTAAATATTGTGTAT
	757	11044490	51:G>A	TGCAGTCAGCTTTTCACAAATTGTATCACATTGTCCTGCCAAGTTAGATGAGCCGCAGCATGAGATCGG
	758	11044525	12:A>C	TGCAGTCCCATAAATTTCTATTAGGTCACTCGTCTGCTACATTTTCTGAAAGCGCACCAAAGATGCAGC
	759	11044550	63:T>C	TGCAGTCCTGATCAGTGTATTCTAACAGTGGAGGAGTCTGTCCTGTCAGAATACAATAAGGATTCCTGC
	760	11044684	19:C>A	TGCAGTGATGACAGTGGGCCACTGGAGGGCTTTGCTTTAAGGTAAGTCTTTCATAATGTGCTAGTAAGT
	761	11044695	51:G>A	TGCAGTGATTTTAATGGAACAGTCTATTATACAACCCAGGGTGGGGAGTCTGCCGGAGATGAATGCAGA
	762	11044778	54:C>T	TGCAGTGGAACTGAGTTATGAATATGCAAATTGCTCTCAGCCAATCAGGAGTTTCATGGCCACTGAGCA
	763	11044847	68:T>C	TGCAGTGTAATATAGGGATCCAGCCTTATGCCCATGTCAGATGCCGGTTTCCCACACTGCATCAGTGAT
	764	11045065	47:T>G	TGCAGTTGCCATGGTGCTGCATGTGAGCAGTGATGATACCAGCCAGTTTGGTTGAGGACACAAGCAAAT
	765	11045117	9:T>C	TGCAGTTGTTAGTGACTATCACAAATCTCCATAATCTGGTAACTTACAATTGATACAAGGCATGAGATC
	766	11045150	24:G>A	TGCAGTTTCCAGTGCTGCACATGTGATCAGTTCTAACAGCAGCCATTAGATCGCTCGACAGTTCAGTTG
	767	11045185	64:G>A	TGCAGTTTTCCCAACTCAAATCAAAGTTAAAGCATTACTAAACCCACAACAGTAAAATCAGTCTGTCTA
	768	11045415	16:A>G	TGCAGAAGGAGAATGCATGTTCTTCATGTCCCTTTAAGAAGCGGTGCATGGTGCATGAGATCGGAAGAG
	769	11045475	29:C>A	TGCAGACATAAAAGCTACCCTAACAGCAGCAATATCGGACCTTAAAGACGACATGCATGAGATCGGAAG
	770	11045484	35:G>A	TGCAGACATGCAATAACATATGGTCAAAGACTATGGGCATGAGATCGGAAGAGCGGTTCAGCAGGAATG
	771	11045517	5:G>A	TGCAGGCGGACTCTTCTACTACGAAGCCATGTTGTCATAGATGTAGCATGAGATCGGAAGAGCGGTTCA
	772	11045670	26:C>T	TGCAGATCAAACGGCCACTCGACCAGCACTGATGTTAGCCTTCACACCCAAAAGCATGAGATCGGAAGA
	773	11045875	5:C>A	TGCAGCAGGTTCCATGGTCCCACACTGCTGGACTTTCTGGGCATGAGATCGGAAGAGCGGTTCAGCAGG
	774	11045968	7:A>G	TGCAGCCAAAATGGACAGCTGCCCGCACACTAGATAGCTGTGGTTTAGCATGAGATCGGAAGAGCGGTT
	775	11046068	8:A>G	TGCAGCTCATGTGAAGGAATCGCTGTACATGGCATCAGTGACCCTGAGCATGAGATCGGAAGAGCGGTT
	776	11046228	8:T>C	TGCAGGCATTATCATTCTCCATTACTTTCACCCTGGTTCACATTGCAGCGATTTGGCATGAGATCGGAA
	777	11046230	50:C>T	TGCAGGCACTGGCTCCTAGAGAACTCCAGAGACCAAAGTTCCACATGGTGCTTTGCATGAGATCGGAAG
	778	11046460	18:C>T	TGCAGGTTTCCGTTAGCACAGCATAGCTTCCCCGAACTTCCAACCATGCATGAGATCGGAAGAGCGGTT
	779	11046460	30:C>T	TGCAGGTTTCCGTTAGCACAGCATAGCTTCCCCGAACTTCCAACCATGCATGAGATCGGAAGAGCGGTT
	780	11046476	20:C>A	TGCAGTAACTCAGCAGACTTCGCATAGAGGTGCATGAGATCGGAAGAGCGGTTCAGCAGGAATGCCGAG
	781	11046596	17:C>T	TGCAGTCACTCCAATATCTCATTTGGGAGACGCATGAGATCGGAAGAGCGGTTCAGCAGGAATGCCGAG
	782	11046622	17:C>A	TGCAGTCCACAGACCTCCGCTGCAACATGTGGCATGAGATCGGAAGAGCGGTTCAGCAGGAATGCCGAG
	783	11046754	13:A>G	TGCAGTGCCCCCAACCACCACTAGGTGGATGCATGAGATCGGAAGAGCGGTTCAGCAGGAATGCCGAGA
	784	11046833	25:T>C	TGCAGTGGTGCCAGAATGAATGGCTTCTGTGTGCATGAGATCGGAAGAGCGGTTCAGCAGGAATGCCGA
	785	11046924	39:C>T	TGCAGTTCAACCGCCCACCTGAAGGAGCCCCTTACACATCGCTTAGCATGAGATCGGAAGAGCGGTTCA
	786	11046937	15:A>C	TGCAGTTCCCGCACCAACAAGCATGAGATCGGAAGAGCGGTTCAGCAGGAATGCCGAGACCGATCTCGT
	787	11046966	24:T>C	TGCAGTTGAAACTTGTGTGATGTCTACTGACTGATGTTGCATGAGATCGGAAGAGCGGTTCAGCAGGAA
	788	11047209	5:A>G	TGCAGACTCTGGCCATCTCTTTGTAGCATGAGATCGGAAGAGCGGTTCAGCAGGAATGCCGAGACCGAT
	789	11047279	11:C>T	TGCAGTGGTGGCAGCACAGGCATGAGATCGGAAGAGCGGTTCAGCAGGAATGCCGAGACCGATCTCGTA
	790	11047299	24:A>G	TGCAGGTGAACATGCTGCCCTTGCAATCTGCATGAGATCGGAAGAGCGGTTCAGCAGGAATGCCGAGAC
	791	11047517	10:A>C	TGCAGACATCACATGGCAGTTATGAATGGCAGAGCTCAGTTGCGGTAGTAGCGGCAATCCAAAACGAGG
	792	11047758	50:C>G	TGCAGCACTTAATAATGAAATATCACAGCATCACCAGCAGCATCTGCATCCCTCCAGGGGAATTCTCAG
	793	11048576	51:G>A	TGCAGTGAAACGAGGAGGAGCAGACTAATAAGCTCATCTCTTGGCCATTCTGCTCTCTCCTCCTATCAG
	794	11048653	23:C>T	TGCAGTGCCATGCCCTAGTACAGCGGCTGAAGGCCATCCTTCTTTATTTGCAATGGCAGACATTGAGCA
	795	11048663	22:T>G	TGCAGTGCGATTCGGTCTTAATTGACCTGCGTTCCATCACAGCACAACACATACTAATGATCTAGCATG
	796	11048674	14:A>C	TGCAGTGCTGCTTAAATCCCACCCATCACACACCCATCGCCACTGGATCAGATCAACATTTCTGCCCAA
	797	11048849	24:T>C	TGCAGTTATCAGTATCAGTAAGCTTGTTCTGAGCAATAATGTCTAGCCAAGCCTAGAGTGCATGAGATC
	798	11048934	26:C>T	TGCAGTTGCCATGGTGCTGCACAGTTCGGTTAAGAGCATAAGCAACTGTGACAGATATCATTCACGGCA
	799	11049029	42:T>C	TGCAGTTTGGCCACAGCACGGGTGTAGTGCAGTGTACCCAGGTTTTTTGTGCAGTATCTGAAAATGCAC
	800	11049081	18:T>G	TGCAGATGTGCGTTTTGGTGCACTTCAATGCGCATCTATTAAACAAATCAAATTGCACAGATACAAATG
	801	11049311	30:A>T	TGCAGAGGATTAACCTTAGGTTCCACAGTGAGTATAACAAGCATGAGATCGGAAGAGCGGTTCAGCAGG
	802	11049386	40:G>A	TGCAGATGCAGGTATTTGGGAGCTGGCAGAGACCGGAAGCGCATCTGCACATGCATGAGATCGGAAGAG
	803	11049684	24:C>T	TGCAGCTTCAGCCCACCCTTAACTCTGTTTAACCTTGGCCATTAACTCAGCATGAGATCGGAAGAGCGG
	804	11049826	29:C>T	TGCAGGCTTAGGAAGTTGTGACTCCACAGCTAGGCTTATATGAGATGAAGAAGCATGAGATCGGAAGAG
	805	11050060	35:A>G	TGCAGTCTCTGATCATCTCCGTTACATTGTTTGCAATCTCTATTTCCTGTAGCATGAGATCGGAAGAGC
	806	11050106	36:T>C	TGCAGTGCAAAGCATCCCTGGAAATGCCCTGTGCCTTCATTCCAGGCACAGCAGCATGAGATCGGAAGA
	807	11050173	14:A>G	TGCAGTGTCCTATCAGCAGGCATGAGATCGGAAGAGCGGTTCAGCAGGAATGCCGAGACCGATCTCGTA
	808	11050352	5:T>C	TGCAGTCTGCCATACAGCATGAGATCGGAAGAGCGGTTCAGCAGGAATGCCGAGACCGATCTCGTATGC
	809	11050380	21:C>G	TGCAGCCTGAGATTGCATAGACCAGCCATTACCAAATCTACTGAGCATGAGATCGGAAGAGCGGTTCAG
	810	11050380	42:G>A	TGCAGCCTGAGATTGCATAGACCAGCCATTACCAAATCTACTGAGCATGAGATCGGAAGAGCGGTTCAG
	811	11050790	14:C>A	TGCAGCCAAGGGATCGTGTGGGAATCTGACAGGCAGACTCCTACCTGTCAGGTGAGAGCATGAGATCGG
	812	11051120	48:G>A	TGCAGTAAAGGTAGGTTATGAGTATGCACATTTTCTCTCAGCCAATCAGTAGCAGTTTCAAGGCCACTA
	813	11051860	6:G>A	TGCAGAGTAGTCCCTTGGTTTGTTTACAATGGCTGCCTGGAGGGGAGCATGAGATCGGAAGAGCGGTTC
	814	11051970	16:G>A	TGCAGCATGTCTCCAGGAACAAATGTAGCATGAGATCGGAAGAGCGGTTCAGCAGGAATGCCGAGACCG
	815	11052062	7:G>A	TGCAGCTGTTGAACCAAAGAGCACAGCATGAGATCGGAAGAGCGGTTCAGCAGGAATGCCGAGACCGAT
	816	11052120	21:G>A	TGCAGTAGGGGAGGAGAGGAGGAGGGGTTTTCTCAGCTAAGCACACTCTCCTGCATGAGATCGGAAGAG
	817	11052178	15:T>G	TGCAGGCGGTCCTGCTCAAGTTTGGCATGAGATCGGAAGAGCGGTTCAGCAGGAATGCCGAGACCGATC
	818	11052364	15:A>G	TGCAGTCTCCTTTCTATATAGGGTACTGCTCAGCATGAGATCGGAAGAGCGGTTCAGCAGGAATGCCGA
	819	11052422	14:C>T	TGCAGTGCTGGGCTCTTCCTATTGTCACAGCTGTCAGCATGAGATCGGAAGAGCGGTTCAGCAGGAATG
	820	11052584	5:G>C	TGCAGGACCATTTACAAGGTGCAGTGTGGCTTGTGCATGAGATCGGAAGAGCGGTTCAGCAGGAATGCC
	821	11052910	41:T>A	TGCAGCTATTGTTCCAATGCAAGCATCAGAGAAAACATGGATCTTCTGGTGCCATTCATTAGGCATGAG
	822	11053397	21:C>T	TGCAGTTACCCTGTCGCTTTTCACTAGAGGGACAGACAACATCTTGTTCTGGATGATACAGCATCCAAT
	823	11053402	61:A>T	TGCAGTTAGCTGGGGAATTTACGTTGGTGGGAACATTTCGGGGTCAACTGAAATTGTGTCCAGCATGAG
	824	11053818	33:G>A	TGCAGGCAAAGGCGTGGTCAAATAACAGGCCAGGGTCAGTTCAGGAGCATGAGATCGGAAGAGCGGTTC
	825	11053846	20:A>G	TGCAGGCTCGATTCTGACGCAAGCTGCATGAGATCGGAAGAGCGGTTCAGCAGGAATGCCGAGACCGAT
	826	11054087	25:T>C	TGCAGACAGGACATCTCTTTTGGGGTGCTCGTTGGGTAAGGGTACCAGGGACGGCATGAGATCGGAAGA
	827	11054349	35:G>T	TGCAGGTGTCTGTGGGTACTGCTCTATAAAAGCCAGCACTTCCCGGATCACATTTGAGCAGTATGGAGG
	828	11054546	47:A>G	TGCAGTTAAATAGCGGGGGCCTCCATCAAAGACCTGCTTATGTGTGTACAAGTCATGTGGTGGCATAGC
	829	11054892	15:G>A	TGCAGGTGGAATTCAGTTTGGCTAGACACCATTTCTATAAGTACCTACAACTCAGGCATGAGATCGGAA
	830	11054949	7:G>A	TGCAGTCGCTGAAAGCCTACTTCTCCTCTCCCTCCTGCCAGCATGAGATCGGAAGAGCGGTTCAGCAGG
	831	11054974	7:A>G	TGCAGTCAAGACCCCGATGAGGGTGACGAGCATGAGATCGGAAGAGCGGTTCAGCAGGAATGCCGAGAC
	832	11055064	12:A>G	TGCAGTACGATCAGACTGTCACGGTGCATGAGATCGGAAGAGCGGTTCAGCAGGAATGCCGAGACCGAT
	833	11055339	65:A>G	TGCAGTATCACCGAAGCATCATTGAAGTACCGCCGAAGCATCACCGAAGCATCAAAAACATAAAAAAAG
	834	11055530	19:C>A	TGCAGACTTTCACTACTAACATACCTCATGAATTTATAAAATAGAGCATGAGATCGGAAGAGCGGTTCA
	835	11055561	15:C>G	TGCAGATATGTGTCTCTCTTGTGCAGAGCCGTCTTTTATCAGCATGGGGATGCATGAGATCGGAAGAGC
	836	11055748	12:G>C	TGCAGTTTATACGTAGCTTTTGTAAGTAAGATGAACATGGAAGGACTTTGCATGAGATCGGAAGAGCGG
	837	11055749	19:G>T	TGCAGTTTTTTGTTTTATTGGGTGGCATGAGATCGGAAGAGCGGTTCAGCAGGAATGCCGAGACCGATC
	838	11056174	27:G>T	TGCAGGTATGCTACTGGAGATAGTCAGGGGCTATGTGCATGAGATCGGAAGAGCGGTTCAGCAGGAATG
	839	11056206	21:A>G	TGCAGTCTGAAGGGATTTCCTATTGCTGGGGATTCCCGGCATGAGATCGGAAGAGCGGTTCAGCAGGAA
	840	11056238	14:A>C	TGCAGTCCGACCATATTTTTTCCCTTTTAAGCATGAGATCGGAAGAGCGGTTCAGCAGGAATGCCGAGA
	841	11056285	5:T>C	TGCAGTGCAGACAGGCAAGCATGAGATCGGAAGAGCGGTTCAGCAGGAATGCCGAGACCGATCTCGTAT
	842	11056314	33:T>C	TGCAGACTCGCACCTGATGAACTAATAAATACCTTGGATTGAAGGGTTGGGTTCAGCTCTGGTGAGAGA
	843	11056347	59:G>A	TGCAGATGAGCAGGTATCAATCCTCACAGGTGGCCAAGTGGTGACTGAGACCACGGATGGTCCATGCAT
	844	11056677	20:T>G	TGCAGGTGCGTTTTGAAAAGTCCTGCATGAGATCGGAAGAGCGGTTCAGCAGGAATGCCGAGACCGATC
	845	11057006	10:A>G	TGCAGTATAGACCGTCTCCTGGATGATCCAGGGGTGCATGAGATCGGAAGAGCGGTTCAGCAGGAATGC
	846	11057035	26:G>A	TGCAGTTCAGGCAACCATGTCAGTGCGGACAGCATGAGATCGGAAGAGCGGTTCAGCAGGAATGCCGAG
	847	11057285	23:G>A	TGCAGGCAGACACAGGGACAAGCGGCATGGAGGGTCCAGCATGAGATCGGAAGAGCGGTTCAGCAGGAA
	848	11057344	10:C>T	TGCAGGTGACCACATTGTCCTTGTGATCTGCATGAGATCGGAAGAGCGGTTCAGCAGGAATGCCGAGAC
	849	11057396	49:T>A	TGCAGGTAAATCTGTTATCTGTAGGTAAAATGAATATCTCCTAAACCTGTACGGTTTAGGAGATATTCC
	850	11057480	23:A>G	TGCAGAGTTTTCCCCTGAAGGAAAAAATCCTTAAGCATGAGATCGGAAGAGCGGTTCAGCAGGAATGCC
	851	11057556	28:T>A	TGCAGTTTACTACTGCTTTTAAGCTGAATTCCAGGAACTCAGGCATGAGATCGGAAGAGCGGTTCAGCA
	852	11057744	6:C>G	TGCAGTCCAGTCCACCCCAGGTCAGGTGTAGGATCAGGTAGAAAAGTTTGCATGAGATCGGAAGAGCGG
	853	11057775	43:A>G	TGCAGTGCTGGTTCATCTACGTCCAGGGGGTACTAGGCCGCTGATGCATGAGATCGGAAGAGCGGTTCA
	854	11057844	20:A>G	TGCAGAACTTTGCGGCCAAAAGCAGCATGAGATCGGAAGAGCGGTTCAGCAGGAATGCCGAGACCGATC
	855	11057879	20:G>A	TGCAGCTAACATCAGTTGCTGCCTCTATGCATGAGATCGGAAGAGCGGTTCAGCAGGAATGCCGAGACC
	856	11058151	8:C>A	TGCAGTACCATGCGTTTTAGCATGAGATCGGAAGAGCGGTTCAGCAGGAATGCCGAGACCGATCTCGTA
	857	11058390	12:C>T	TGCAGATGCATCCTGTGCCGCCAGCGCCTGAGCGATGCATGAGATCGGAAGAGCGGTTCAGCAGGAATG
	858	11058436	28:G>A	TGCAGTCAGCAGTGCGCACCCTTTTGTCGCACCGTCAGTCTTCATTACGGTTCTGCATGAGATCGGAAG
	859	11058574	24:G>T	TGCAGATATGCATCTCCTGTGCTGGGCTTTTACCAGCATGGAAATGCACAAAGTGTTGCATGAGATCGG
	860	11059112	27:T>C	TGCAGGTCAAGACCCCGATCAGGACGATGAGCATGAGATCGGAAGAGCGGTTCAGCAGGAATGCCGAGA
	861	11059275	22:C>T	TGCAGTACTTGTGAATGGACTACGAGCATGAGATCGGAAGAGCGGTTCAGCAGGAATGCCGAGACCGAT
	862	11059329	25:C>T	TGCAGGCACACTCCTGCCTGTCAGACGGATGCATTCAGGTGGCTGTGCTACAACCCGACTGCCTCCACA
	863	11059456	34:C>T	TGCAGCTCCCATGTAGCCCCAGACCATGACACTCCCACCAGCATGAGATCGGAAGAGCGGTTCAGCAGG
	864	11059687	11:T>C	TGCAGCATATTTTCAGCCAAAAATGTAGCATGAGATCGGAAGAGCGGTTCAGCAGGAATGCCGAGACCG
	865	11059733	19:C>T	TGCAGCCTCTTTGCAGTCACTTCATGTCTACATGCATGAGATCGGAAGAGCGGTTCAGCAGGAATGCCG
	866	11059818	41:C>T	TGCAGACACATCTTTTTTGGAGGGCTCAGTTGGTAGGAGTACCAGGGATGGCATGAGATCGGAAGAGCG
	867	11060074	8:A>T	TGCAGTGCATTGAAGGCTGCTGATTGGCCAAAGCATGAGATCGGAAGAGCGGTTCAGCAGGAATGCCGA
	868	11060218	21:G>T	TGCAGATGTGGTGCACTTTCTGAAAATGCACCAAAACTCCTGCATGAGATCGGAAGAGCGGTTCAGCAG
	869	56826485	24:C>T	TGCAGAAGAAGAGGGGGCTTGATCCAGTACCTAGTCAAGTGGAAGGGGTACAGACCAGAGGAGAGCTCC
	870	56826490	5:A>G	TGCAGAAGAGGATGCAGTGATGCACTGGACTCGGTACGTTTGATACTCTGAACAAGCTCAGCATGAGAT
	871	56826559	14:C>T	TGCAGACCAGTCTCCGAAGATAGGGGATCATGTTCTGCTTCAGTATGTCACAGTACATGTCGGCATGAG
	872	56826585	8:T>G	TGCAGACTTTCAGCTTTAATTTGAGCATTTTCCCTTCAGTTTTGTCTTCAGCAAGTGAAATGCATGAGA
	873	56826649	43:A>G	TGCAGAGTAAAGCAGTGGCCAGGCTGCATCTTTGAGAGACAAAACACATCTTACTTTAATTTCTGTAAA
	874	56826717	54:A>G	TGCAGATCTCAGACTTTTGTAGGACTGCGCCTATTTAACCTTTGTTTTTGAAGCAGTGGCATGAGATCG
	875	56826740	36:G>A	TGCAGATGTCCTCAGTTATGACTTGATGGCTTGACCGTTCAGTTGAGAGCACAAGCAACTGTGACAGTT
	876	56826806	23:C>T	TGCAGCACGGCTGAGCAGTGTTGCAGCCAGCTAATATTTGTCACAGGTTGCTTACCCTGTAATCCTTGT
	877	56826879	19:G>A	TGCAGCCCTATTCTAGGGCGAGGGTGCTACACTGATAATGATACAAAGCACAGTATCAAATCCACCAAG
	878	56827010	18:T>G	TGCAGCTTGGCATTGCACTGTATTGTTAACTTTATGATCTACCAGAACATCCAGATCCTTCTCCACCAT
	879	56827152	25:A>T	TGCAGGCTTTCTTGTGCATCATCTTAAGAAGAGGCTTTCTTCTGGGAAATATGTCTATTTCCCAAAGAC
	880	56827207	25:T>C	TGCAGGTACAGCCCAGGATTCGTTTTGCTGAGGTGCTGGAGTGTTTCCTGCATTTGAGGAGAGTCTGTG
	881	56827214	10:C>T	TGCAGGTATGCCAGCAAAAACAATTTCTCACAGCAAAACTGGCAAAGTAGAAACAGCCTCAGTAACTCA
	882	56827234	46:A>T	TGCAGGTGCCAGCCAGTCTGGAAGTTTGGGGGTGGAGCCACATTACAGAGGAGACCCAGCATGAGATCG
	883	56827247	21:G>A	TGCAGGTGTCTGGTGTCTCCCGTGGAGTGGAGCTCTAACAAAGCATGTCCGCTCAGCTAGCCTCCATGC
	884	56827273	58:C>T	TGCAGTAAACAGATCATAGCATGTCATTTGCTTGATACCTTTTCCATTCAGAAAACGTCTTGCATTCTT
	885	56827301	30:C>T	TGCAGTACCCACAGATCAGCTCCCACTGTGCAATCACAGCTGAAGCAGGCTGCCAGTGGCACGCATGAG
	886	56827356	13:G>C	TGCAGTCCACTGTGTGTGTCAGAAGCAGCCGGGGAAAGATGCCAGTTGCAATGCAAAATGTTGCTTGCA
	887	56827382	15:A>G	TGCAGTCTAATTGGTATGGGGGACCTCCTCAAAAAGGGATGCTGTTGTCCATAGACTGGCAAAAAGCAT
	888	56827397	52:C>T	TGCAGTCTCTTACTTAAGCCTCGTACACACGGGACGACGATCGTGTTCAACACGTCGTACTCACGACCG
	889	56827442	47:G>A	TGCAGTGCAGTGATTTGCTAAAAGCACCCTGCCCTTAGCCAATCAAAGCTCTCACAGCAGGCCGTCCGC
	890	56827445	17:T>A	TGCAGTGCATCAATGCATATACCATGTTATCGCAAAGTCACAGAGTAATCCCAGCTTAAAGCACCAAGT
	891	56827471	40:A>G	TGCAGTGGACCTGAAAATCTGGTCCAGAACCCACCCTACCATGGTGGCCAGTAAGATTCCACCTTAGTC
	892	56827472	36:G>A	TGCAGTGGACTGCACACTAGTCTCTGGTTGGGTGACGGAGGATGAGGAGGTGGAGGATGTCCACCACCT
	893	56827477	30:G>A	TGCAGTGGCAGCAGCTGAGGATGTACACTTGCTACAGCAGGAATTAAACCCCTGTTGCTTTTGCAATGT
	894	56827484	43:C>G	TGCAGTGGCTGTACAAGCAGCAGAGGGCCATCCATAAATACCTCTGTGAGTATGGCACAATGACAGGCT
	895	56827487	50:T>G	TGCAGTGGGCATGTTTGTGTGACTTGCTCAACTGTTTGGATCAGGTAAACTATCACTTTTTCAGTTCTG
	896	56827498	52:C>G	TGCAGTGTATGGGATTTTTCTTTAAGTCATGGATCTCTGGAAAATGTGATTTCCCTATGGATCTCTGGA
	897	56827535	40:T>C	TGCAGTTAAACTTTGAAGCTGCCATGCAAGAAAAGAGAAATGGAGAGTCCCATGAAGGTCTGATATCAT
	898	56827600	50:G>C	TGCAGTTGGCGTGGTACTGCATATGGAATTACTTATGACACCAACCATTTGATGGCCTGACAGTTTGGT
	899	56827616	61:A>G	TGCAGTTTAAATTTGCCACTATATTTTCCCTTAGCCTGGTGCAAGTTTGACATCTGGCACTACTTTGTT
	900	56827634	48:C>T	TGCAGTTTGATTGCACTGTTACTGTATGCGTAGACATGCCATCTGCTGCCTAAAAAAGGGAACTGGCAT
	901	56828818	9:T>C	TGCAGAATCTAAAACTCGCAGCGTGGAGCCAAATTTAGCTGCATGAGATCGGAAGAGCGGTTCAGCAGG
	902	56828837	9:G>T	TGCAGAATTGCCCAAAGGGGACATTATGCATCCACTTTGGATGATGGTGACTCTTAGCATGAGATCGGA
	903	56828852	16:A>T	TGCAGACAATTACAGCATTTAAGTCTTCAGCATGAGATCGGAAGAGCGGTTCAGCAGGAATGCCGAGAC
	904	56828872	12:T>C	TGCAGACAGAGCTATTGAGAAGATGAACGGCATGAGATCGGAAGAGCGGTTCAGCAGGAATGCCGAGAC
	905	56828883	42:A>T	TGCAGACAGGCCCTTGTAAAGACTCTGAATACCAGCACACTCAGCATGAGATCGGAAGAGCGGTTCAGC
	906	56828893	41:G>A	TGCAGACATCAGGCAGGGTTCCTGGACAGCTATCAGCTGCGGTGACAAGCATGAGATCGGAAGAGCGGT
	907	56828925	6:C>A	TGCAGACCTGGAGTTGTGGCTTTCTGCATGAGATCGGAAGAGCGGTTCAGCAGGAATGCCGAGACCGAT
	908	56828982	23:C>T	TGCAGAGAAAGCTCAGCCAGATGCGACGCATGAGATCGGAAGAGCGGTTCAGCAGGAATGCCGAGACCG
	909	56828992	12:A>G	TGCAGAGACAACAACGCATTCTAATGCATGAGATCGGAAGAGCGGTTCAGCAGGAATGCCGAGACCGAT
	910	56829024	7:A>G	TGCAGAGAGCTCGGGATTGGAGACGGGATGGAGACATGCATGAGATCGGAAGAGCGGTTCAGCAGGAAT
	911	56829081	38:A>G	TGCAGAGGAAGATTTCTTTATAATGAGCAGCATTTGGCAGCATGAGATCGGAAGAGCGGTTCAGCAGGA
	912	56829156	26:G>A	TGCAGATAAACCACAAGAAAAAGACTGTGAATTAAGAAATGAGAAATCAAGCATGAGATCGGAAGAGCG
	913	56829164	10:G>A	TGCAGATAATGAATGCATGGCTGTATGTTTGTGCATGAGATCGGAAGAGCGGTTCAGCAGGAATGCCGA
	914	56829178	7:A>G	TGCAGATAGACAGTTGCTCTTCAGCATGAGATCGGAAGAGCGGTTCAGCAGGAATGCCGAGACCGATCT
	915	56829192	21:C>T	TGCAGATATACAGCTATGAGGCTTTAGACACAGGCATGAGATCGGAAGAGCGGTTCAGCAGGAATGCCG
	916	56829201	20:C>T	TGCAGATCACATCCCTAGGTCTCTCCAGGTTTGGCTGAGCATGAGATCGGAAGAGCGGTTCAGCAGGAA
	917	56829216	14:C>A	TGCAGATCCTGAGGCCAGGACAGCTGCAAGGTAAGCCAGAGCATGAGATCGGAAGAGCGGTTCAGCAGG
	918	56829226	9:C>T	TGCAGATCTCGGAAACATGGCTATAGCATGAGATCGGAAGAGCGGTTCAGCAGGAATGCCGAGACCGAT
	919	56829230	35:C>T	TGCAGATCTGTGCAGTATTTCAGTGTGAAACATTACCTCTATGGAGGAGCATGAGATCGGAAGAGCGGT
	920	56829262	27:C>T	TGCAGATGTGGCTCATCCAGAAGCTGGCGTTGAGCATGAGATCGGAAGAGCGGTTCAGCAGGAATGCCG
	921	56829274	29:G>A	TGCAGATTATCAATGATCACATGGCCAATGTCATACATGTATACTGCATGAGATCGGAAGAGCGGTTCA
	922	56829284	24:G>A	TGCAGATTCTATTATGATGTACTGGGGCTTCAGCATGAGATCGGAAGAGCGGTTCAGCAGGAATGCCGA
	923	56829288	12:T>A	TGCAGATTGAGATTGTGTAGACCAGCTCTATGGTGCATGAGATCGGAAGAGCGGTTCAGCAGGAATGCC
	924	56829331	33:A>C	TGCAGCAAAGTGCCTTGTGTGAATGGAGTCCTAAGGCATGAGATCGGAAGAGCGGTTCAGCAGGAATGC
	925	56829376	17:G>A	TGCAGCACACATGCAAGGCTTGCAGGGAAGCATGAGATCGGAAGAGCGGTTCAGCAGGAATGCCGAGAC
	926	56829480	24:G>A	TGCAGCAGTGTGGCTCGTCATCGCGAATTGCCGTCTATAAACAGCGATTTGTGCATGAGATCGGAAGAG
	927	56829504	11:G>A	TGCAGCATCCAGTGGCTACCAAGGAAGAGCATGAGATCGGAAGAGCGGTTCAGCAGGAATGCCGAGACC
	928	56829512	22:C>T	TGCAGCATGAATATAAATCAGACACCCTCTGGTCTGGTGCATGAGATCGGAAGAGCGGTTCAGCAGGAA
	929	56829514	16:A>T	TGCAGCATGAGTGACCAGCAAAGGGATGGCAGTGAGCATGAGATCGGAAGAGCGGTTCAGCAGGAATGC
	930	56829516	20:A>G	TGCAGCATGGAGCAGAGTTCAGTGGCTGTGCATGTGTATGTATAGCATGAGATCGGAAGAGCGGTTCAG
	931	56829523	30:G>T	TGCAGCATGTGTGTGATGACCTCATTGGGGGGAGAAGTCACTGCACATTTCTGTGCATGAGATCGGAAG
	932	56829613	18:C>T	TGCAGCCCCACCTGGTCCCGGACATTGATGAGCATGAGATCGGAAGAGCGGTTCAGCAGGAATGCCGAG
	933	56829635	6:C>T	TGCAGCCCTGATTATCCAAAGCATACAGGTCAGGTGCATGAGATCGGAAGAGCGGTTCAGCAGGAATGC
	934	56829658	24:A>T	TGCAGCCTAAATCAATTGATGCATAGCATGAGATCGGAAGAGCGGTTCAGCAGGAATGCCGAGACCGAT
	935	56829696	32:G>A	TGCAGCCTGCACAAGTGTGACAGCGCGATCCCGGCATGAGATCGGAAGAGCGGTTCAGCAGGAATGCCG
	936	56829720	18:T>C	TGCAGCGAAAGGTGTTTGTAGAAAGTATTGACTCGCGGCAGAATACAAATGCATGAGATCGGAAGAGCG
	937	56829748	10:G>A	TGCAGCGGGCGGTCGGCAATTGGTTAAGGAACTCAAGCTCAGCATGAGATCGGAAGAGCGGTTCAGCAG
	938	56829774	15:T>A	TGCAGCTACAAAAGCTGGCAGAATATTAGCATAGCATGAGATCGGAAGAGCGGTTCAGCAGGAATGCCG
	939	56829776	23:G>T	TGCAGCTACAATCGGCCAGACTGGAGCATGAGATCGGAAGAGCGGTTCAGCAGGAATGCCGAGACCGAT
	940	56829788	28:G>A	TGCAGCTAGATTAGGCAGGTTAGTTAGTGGCATGAGATCGGAAGAGCGGTTCAGCAGGAATGCCGAGAC
	941	56829812	21:A>G	TGCAGCTCACCTCCTTCCTGCATGTAGTGTCAGCATGAGATCGGAAGAGCGGTTCAGCAGGAATGCCGA
	942	56829869	35:T>A	TGCAGCTGATTGGCTGCAAACATTGGTCAGTGTATTCCAACAGCAGCATGAGATCGGAAGAGCGGTTCA
	943	56829910	18:C>T	TGCAGCTGTCACTAACCTCTTGTATCTCTCTGCATGAGATCGGAAGAGCGGTTCAGCAGGAATGCCGAG
	944	56829929	20:G>C	TGCAGCTTACGCATGTATTTGCATATGTGGTTTTCTTTTGCATGAGATCGGAAGAGCGGTTCAGCAGGA
	945	56829945	25:G>T	TGCAGCTTCCTGGAGAGACTATCCTGGTCCTGGCAATTGTTCACTTTGGAGCATGAGATCGGAAGAGCG
	946	56829946	18:T>C	TGCAGCTTCCTTCCCAGCTTCAGCATGAGATCGGAAGAGCGGTTCAGCAGGAATGCCGAGACCGATCTC
	947	56829959	17:C>T	TGCAGCTTGTGCTAATCCTCTGAGACACTAGATGCATGAGATCGGAAGAGCGGTTCAGCAGGAATGCCG
	948	56829967	23:A>G	TGCAGCTTTGCTGCTGATCTGTCACCTCTCTTACTATCAGACAAGATTATCAGGCATGAGATCGGAAGA
	949	56830175	25:G>A	TGCAGGCCATGTCATATCATGCCTCGAGCATGAGATCGGAAGAGCGGTTCAGCAGGAATGCCGAGACCG
	950	56830239	16:C>T	TGCAGGGAATGACACCCACTGGTCAAAACATGCACATGACATGCATGAGATCGGAAGAGCGGTTCAGCA
	951	56830283	21:G>T	TGCAGGGCACAGGAATGCACAGGAAGCATGAGATCGGAAGAGCGGTTCAGCAGGAATGCCGAGACCGAT
	952	56830356	18:A>G	TGCAGGGTGTGAGTATCCACCTTGTGTTGCATGAGATCGGAAGAGCGGTTCAGCAGGAATGCCGAGACC
	953	56830373	35:G>T	TGCAGGTAAACTCTAATGGCCTCAATTACATCAAAGATGTGCATGAGATCGGAAGAGCGGTTCAGCAGG
	954	56830378	32:A>C	TGCAGGTAAGCCTATAACCTACAGGTAAGCCTATGAGGACTTGCGCTTGCATGAGATCGGAAGAGCGGT
	955	56830382	6:T>G	TGCAGGTAATGACAGCTCTGGTCTCAGGGCAAGTGTGCGCATGAGATCGGAAGAGCGGTTCAGCAGGAA
	956	56830384	11:C>A	TGCAGGTAATTCTTGCTTCAATTGGTGTGCATGAGATCGGAAGAGCGGTTCAGCAGGAATGCCGAGACC
	957	56830385	15:A>C	TGCAGGTAATTTCTGAATTTGCAGTATTTGACTGTAGTGAATTGACACTTGCAAATGCATGAGATCGGA
	958	56830400	30:G>A	TGCAGGTAGGGCAACCAAGTGAAATGAATGGGCTCCCCTACATGCAGCATGAGATCGGAAGAGCGGTTC
	959	56830443	31:C>T	TGCAGGTCTTGTCCCGTGCCCTAATGCATATCCCTCAGCTGGGCAAGCATGAGATCGGAAGAGCGGTTC
	960	56830449	22:A>G	TGCAGGTGACATTTTAATAACTACGCTGCAAGCATGAGATCGGAAGAGCGGTTCAGCAGGAATGCCGAG
	961	56830457	22:G>T	TGCAGGTGCCTTGAGGGTATGAGAAAGCATGAGATCGGAAGAGCGGTTCAGCAGGAATGCCGAGACCGA
	962	56830463	22:A>C	TGCAGGTGCTGTTTCATGCCTGAGAAATCGTTGTATGTGCATGAGATCGGAAGAGCGGTTCAGCAGGAA
	963	56830492	27:T>A	TGCAGGTTATCCCCACTCAGTCTGTGATGTTGTGCATGAGATCGGAAGAGCGGTTCAGCAGGAATGCCG
	964	56830497	6:T>C	TGCAGGTTCCTCCTGTGTAAATTGTGGGTCATGAGAATTGCGCATGAGATCGGAAGAGCGGTTCAGCAG
	965	56830511	22:A>G	TGCAGGTTTCTACTAGTAGAATACCACATCACTTCAGGAAATGGTGCATGAGATCGGAAGAGCGGTTCA
	966	56830526	19:A>G	TGCAGTAAAGATCTCTCTGAGAGTGGGTTCAGGATCTTGTAAGTCAGGCATGAGATCGGAAGAGCGGTT
	967	56830557	21:C>A	TGCAGTAATTCTTTCTCATCCCGATGTAACTGACTGTATGGAAGTTGCATGAGATCGGAAGAGCGGTTC
	968	56830562	14:G>A	TGCAGTACAAGACCGTATTGGATTCATCCAGACCAGGCATGAGATCGGAAGAGCGGTTCAGCAGGAATG
	969	56830590	12:G>C	TGCAGTACTCAAGAGCTAACAATAAAGCATGAGATCGGAAGAGCGGTTCAGCAGGAATGCCGAGACCGA
	970	56830614	9:T>G	TGCAGTAGTTAAATCATGCTGGAACCAAGGCATGAGATCGGAAGAGCGGTTCAGCAGGAATGCCGAGAC
	971	56830618	23:C>A	TGCAGTATAATCTTTTGTCCTTGCACACAGCATGAGATCGGAAGAGCGGTTCAGCAGGAATGCCGAGAC
	972	56830646	15:C>T	TGCAGTCAAATACACCCTGTGCATGAGATCGGAAGAGCGGTTCAGCAGGAATGCCGAGACCGATCTCGT
	973	56830651	30:G>C	TGCAGTCAAGGGGCTGGGCAGTGGCATTGTGTGCATGAGATCGGAAGAGCGGTTCAGCAGGAATGCCGA
	974	56830657	9:T>A	TGCAGTCACTGCTTCCCTATAGAGTAAAACAGACTTTTTGCATGAGATCGGAAGAGCGGTTCAGCAGGA
	975	56830665	28:C>A	TGCAGTCAGAGCTCCACAGAAATGCCAACTCTGCATGAGATCGGAAGAGCGGTTCAGCAGGAATGCCGA
	976	56830667	29:A>T	TGCAGTCAGCACAAGGCATCCACAGTCAGATGGCATGAGATCGGAAGAGCGGTTCAGCAGGAATGCCGA
	977	56830681	15:G>T	TGCAGTCATTTTCCTGCACTCTAGATCAGGTATTGTGCATGAGATCGGAAGAGCGGTTCAGCAGGAATG
	978	56830685	17:A>T	TGCAGTCCAAGAGTGGCAAAATAGCATGAGATCGGAAGAGCGGTTCAGCAGGAATGCCGAGACCGATCT
	979	56830693	17:T>G	TGCAGTCCCCAAGACTATAATACCTTTGTATGCATGAGATCGGAAGAGCGGTTCAGCAGGAATGCCGAG
	980	56830730	5:C>T	TGCAGCCTCTTTGCAGCTACCACTTAATATGCATGAGATCGGAAGAGCGGTTCAGCAGGAATGCCGAGA
	981	56830747	19:T>G	TGCAGTCTTCAGCTCTTCTTGGGCCTCTCCCTGGCCCAAATCAAAACAACCAGGCATGAGATCGGAAGA
	982	56830756	11:G>A	TGCAGTCTTTTGGCTTCCATTGTTGCTCCATTTGGACCCAGCATGAGATCGGAAGAGCGGTTCAGCAGG
	983	56830764	24:C>A	TGCAGTGAAAGGGTTAATCTGTTCCCCCAGCATGAGATCGGAAGAGCGGTTCAGCAGGAATGCCGAGAC
	984	56830787	21:A>T	TGCAGTGATAAAGTTATACCCAGGGCTCAGAGGAGCCAGCACACAGCATGAGATCGGAAGAGCGGTTCA
	985	56830799	10:G>A	TGCAGTGATTGGCAGCTTCCTTAGTGGTCTTTCAGGAATGAGATATGCATGAGATCGGAAGAGCGGTTC
	986	56830817	15:T>C	TGCAGTGCAGGCTGATACCATCATAGGCATGAGATCGGAAGAGCGGTTCAGCAGGAATGCCGAGACCGA
	987	56830831	10:C>T	TGCAGTGCCCCAAATGCCTGTTTGGCACAAACTCCTCAAAGGTGTTTGTTCAGCATGAGATCGGAAGAG
	988	56830839	5:T>C	TGCAGTGCTAGGACCCATTTTCAGCTGAAAGCATGAGATCGGAAGAGCGGTTCAGCAGGAATGCCGAGA
	989	56830842	9:C>T	TGCAGTGCTCCTGCATACCACTGTGCATGAGATCGGAAGAGCGGTTCAGCAGGAATGCCGAGACCGATC
	990	56830851	7:C>T	TGCAGTGCTTCCCCTCTCCACAGGCAGAAGCATGAGATCGGAAGAGCGGTTCAGCAGGAATGCCGAGAC
	991	56830874	8:C>T	TGCAGTGGCTTCTACTCTAAACACTTCTCTGTCATTATCGGCATGAGATCGGAAGAGCGGTTCAGCAGG
	992	56830902	24:T>C	TGCAGTGTACATGCTGAGAGAACATTCTCTGCAACATGGCTTCCAGCAAGGCATGAGATCGGAAGAGCG
	993	56830966	19:G>A	TGCAGTTAATAGAGCACTGGTGCCCAGCATGAGATCGGAAGAGCGGTTCAGCAGGAATGCCGAGACCGA
	994	56830968	15:T>C	TGCAGTTACACACCGTCCACCTTTCCCTGGCTCTTGATTTTTGAGAGCATGAGCATGAGATCGGAAGAG
	995	56830981	8:T>G	TGCAGTTATGACAGCGGCCATGCAGGGATGGTGTTACGCATGAGATCGGAAGAGCGGTTCAGCAGGAAT
	996	56831007	7:C>A	TGCAGTTCTATTCTAGGCTTGTCTGTGCATGAGATCGGAAGAGCGGTTCAGCAGGAATGCCGAGACCGA
	997	56831026	32:C>T	TGCAGTTGATCACCTAATGGCAATAATGTACTCGATGCATGAGATCGGAAGAGCGGTTCAGCAGGAATG
	998	56831031	7:G>T	TGCAGTTGCATTCTCTTATGCCCACTGTTCATTATGGCATGAGATCGGAAGAGCGGTTCAGCAGGAATG
	999	56831033	20:G>T	TGCAGTTGCCCACCTGAGTTGCATAACCTCTTGCTGTCTGTGTAATGCATGAGATCGGAAGAGCGGTTC
	1000	56831035	17:C>T	TGCAGTTGGAGATTCTACAGAGCACAGCTATTGAGCATGAGATCGGAAGAGCGGTTCAGCAGGAATGCC
	1001	56832793	30:G>T	TGCAGTCATCTCCAAAACCTGCACTGAGAGGAATGAAGTATTAGCAATGCATGAGATCGGAAGAGCGGT
	1002	56832988	7:G>A	TGCAGAGGATTAACCCCTTAGGTTCCACATTGAGTAAAACAAGCATGAGATCGGAAGAGCGGTTCAGCA
	1003	56833062	15:T>A	TGCAGCCTGAGATTATCTAGACCAGCTGGTGTCCTCTACTGAGCATGAGATCGGAAGAGCGGTTCAGCA
	1004	56833097	37:C>G	TGCAGCTTGGAATTGTGTAGACCAGCCATTGCCACATCTACTGAGCATGAGATCGGAAGAGCGGTTCAG
	1005	56833144	14:A>T	TGCAGGTGGAACCAAAGCATGAGATCGGAAGAGCGGTTCAGCAGGAATGCCGAGACCGATCTCGTATGC
	1006	56833155	35:C>A	TGCAGGTTGAGATTGTGTAGACCAGCTGGTGTCCACTAGGAAGCATGAGATCGGAAGAGCGGTTCAGCA
	1007	56833164	17:C>A	TGCAGTCAGGACGAGATCCCGATGAGGAAGATGAGCATGAGATCGGAAGAGCGGTTCAGCAGGAATGCC
	1008	56833171	23:G>T	TGCAGTCTATGATCATCTCTAGTGGCATGAGATCGGAAGAGCGGTTCAGCAGGAATGCCGAGACCGATC
	1009	56833378	17:G>A	TGCAGAACAATTTTCTTGTGTATGGCAAACTTCGAGATGATATGTGCGAGGAGCAGATGGCCGCTGTAT
	1010	56833415	6:C>A	TGCAGACGACTATACAGAGACCCAGGGATTGTGAGTTTCTACACAGTTTTTAGACTACAGACAGAGGTT
	1011	56833455	49:C>T	TGCAGAATGTATTCAGTTGCTTCTGTCACATCAATAAAGACCAAAGACCCAATGCTACTGGAAGCCATG
	1012	56833524	64:C>T	TGCAGACCAAACAGCAATGTGTCAGTGCAGTAGTTCAGTTCAAATAGCCAGTGTCAGTGGCAAACGCGC
	1013	56833782	46:T>C	TGCAGATCGAAGAATGCTGTGAGAGAGTGACAGGAGGAATGAAGTGTTGTCTAGTGGCTGCAAAGGACC
	1014	56833803	11:G>A	TGCAGATGCAAGTGGAACAAATTGAATATGAGTTAATCACGTCCTATCACAGGGTACACAGTCTTCTAG
	1015	56833931	19:A>C	TGCAGCACTGATTCTGAGCACGGGCACAGTTTAAATAGCCCATCTGACTCCAACATCTGGCACAAGTGC
	1016	56834289	57:C>T	TGCAGCTCTTGTGAAATGTTCCCAGTCTGCGGTGGTCAGGATCTATCAAATGTGGTACAAGGTAGGAAA
	1017	56834289	65:G>A	TGCAGCTCTTGTGAAATGTTCCCAGTCTGCGGTGGTCAGGATCTATCAAATGTGGTACAAGGTAGGAAA
	1018	56834316	19:C>T	TGCAGCTGCTACAAGAGATCGGCGGGTCTCGGGAGGACATCTGACCCACGGGCACGCCCATGCAGCATG
	1019	56834337	60:T>C	TGCAGCTGTCTTCAGTTATTCTTTGTTTGTGTCTTTCTGCCGTTAGTTTTGCTTTCAGCATGTGAAATG
	1020	56834392	11:A>G	TGCAGCTTTCAACTTGTTGACAGGCAGTGTTCTCTGGGAACACGCTGCCACCGATACGCATGAGATCGG
	1021	56834402	41:A>T	TGCAGCTTTGCTCTAATGTTGCGATCTCTTGCCAAGCAACCAGCATGATTAATCACCAGGGGAGAAAGT
	1022	56834404	67:C>T	TGCAGCTTTTGCACAGCAATCAAAACATACTTTATGGGTACAAGGAAGCACAGGTTTTGTTTAACCACG
	1023	56834569	54:G>A	TGCAGGCCGCCCTCTGGCTCTCATCACCGCACATGAATGCCCCCTTTTACTACCGTATATCGGCATGAG
	1024	56834577	40:T>C	TGCAGGCGGGTTACACTTGTCCTTTTTTTCCTGCTGTTGGTCATGTTATTGAGCCACAGCATGAGATCG
	1025	56834605	41:T>C	TGCAGGCTTCCTGACATTGCCCCCTCCCTATGGGCAACCTCTGGGTAACCATTCGTTTCTTGGCATGGA
	1026	56834719	21:G>T	TGCAGGTATGCAAAGGAGAATGATATCAGCTAGAGAGATTTCAATAATCTGCCAAACAGCAAGTGCAAA
	1027	56834725	61:G>C	TGCAGGTCAGACACCAATGGACTAGTGCAGTATGTGCGTTTGTGCAAATGCTTTCACCTGAGCACAGTA
	1028	56834746	23:A>G	TGCAGGTCTGCAATTGATCTGGAAGAAATGGCATCTGGTCTCAATAAGAGAAAAATGATTCAGCATGAG
	1029	56834747	41:G>T	TGCAGGTCTGGGAGGCAAGGAAGATCTGCCTTTCTTTTCTGGCAAAAGGCAAGCTATGAAGTCAGAGCA
	1030	56834758	10:C>T	TGCAGGTGAGCGGCCGGTGTAGGCAAAGCAGCGTACCCTTACGTTGCTGCCGATTTCCGTGTTTAGATC
	1031	56834898	43:A>G	TGCAGTAGGAATTAAACCCCTATTGCTTTTGGTGGGTGACCGCAATCCATTCAAGTTAATGATTCACAC
	1032	56834901	17:G>T	TGCAGTAGGTATGTCTAGCTTGTTGCTTAGGGCTCATTCAGACAGGCCATTAAGCCAGTTCTCCATACA
	1033	56834934	56:T>C	TGCAGTATTAATGTGCTAGGTTGTAAAATCAGGCTCCATCTCCTAGCCTTGAAATTTATAGCATGAGAT
	1034	56834956	19:C>T	TGCAGTCAATCAACTTTCCCCAGACAGGGAGTGACTGGATAGGGCAAATGTTTGCCAATGTCTGCATGA
	1035	56834964	26:C>T	TGCAGTCACCAATGTCATCTTCTGTGCGAGAACATTGTAATGCTTTCTGGATTATGAACAATATGAGAG
	1036	56834983	18:G>A	TGCAGTCAGTGACACATGGTGGGGTTTTTATAGCTACCTGCTCTTTGGTAGATCCATGATCAAAAAAAC
	1037	56834985	36:G>A	TGCAGTCATAATCTTCTGGTGCCACAGGGTTAATACGCTCAGCTGGACCTCTCACAGGCTCTTGACGAA
	1038	56835006	54:G>A	TGCAGTCCATATCTCTTTTAATACAAGAAAGGGTTTTGCTCACTTGGGAAACCGGAGATTTGCATTGCA
	1039	56835048	38:G>T	TGCAGTCTCACCGTTAGGGGTAAGTAGCATTGCAAAATGGTATGTAATATTTAAGTATCTCCTGCCTCT
	1040	56835062	42:C>A	TGCAGTCTGACCATCTCCTGTATCATGTCTGCTAGAGGTGCACCTAATGGAAGTTTTGTGAATACTATT
	1041	56835090	9:A>T	TGCAGTGAAAGCCTGACAAGGTCTCTACCCCACTCCGTCACGAAACAAATACAGGTATCACATAGGCAT
	1042	56835094	32:C>T	TGCAGTGAAGGAGTGTGTGAAGTGTAAAACTGCATTCAGATGTGGCTCCCTTTCAGATGTGGCATGAGA
	1043	56835105	35:C>T	TGCAGTGAGATGCAGATCAATAGCAGTACTTCATTCCACTATAACAGACAATAACACAGCACTGTAGAC
	1044	56835117	23:C>T	TGCAGTGATTAGTAAAAGCTGTACACAGCAAAGTGCTCTTCCATATGATAAAGCTGTGCATGAGATCGG
	1045	56835132	15:G>T	TGCAGTGCATTATTTGTCTCCTCTTCTTGTCTCTTTGACCTTCATCATTTAGCTCTCTGGAGTGGACTC
	1046	56835156	8:T>G	TGCAGTGCTCTTTCAGATCATTTCATCAATTCCCAGGATAAAGAAACCAGAATGAGACAGACTTGTGTT
	1047	56835215	33:T>A	TGCAGTGGTGAGGTAATGAGCCCAGCTGAAGTATGTTGGCTCATTAGGACCTCTACATATTCCCAGCAT
	1048	56835219	59:C>A	TGCAGTGTAAATACCTCGCCATATAGACTCACCTTTCGGAGCAGAGAGCGGTCAAATGCCCCCAGTGCC
	1049	56835221	11:A>G	TGCAGTGTACAATGACAATGAGGGCAGAGATTGTTGTGAATGTACAGTATGTAATGCACAGCATGAGAT
	1050	56835326	61:A>T	TGCAGTTCCTGTGAAGCTGTCGCCAGGGGGAGCCTGCGCCAATACTAATCTGTCTTTTTGCAATGTAAG
	1051	56835335	43:G>A	TGCAGTTCTTGTGGTTGGAGTCCAGAGTGTAATGAGAGGAGCAGCTACATCTGTATCCATTTGGCACGG
	1052	56835344	50:A>T	TGCAGTTGCCATAGTGCTGCATATGTTGACTCCAACTACTTGATGATTTGACAGTTTGATTGAGAGCAC
	1053	56835369	44:G>T	TGCAGTTGGCTGAAGAAATAGGCAGACTGGGGTGATTGTTTCCCGTGACACAATACAGCATGAGATCGG
	1054	56835517	5:A>C	TGCAGATCAAAATTATACAGAGTGGCACCCTCCAACCCCACCCTGTTGGATCTCCCACTGCGCATGAGA
	1055	56836307	11:G>A	TGCAGAAAAGAGAAAATACTACTGGCCTCTAAACTCTCCTCACAGCTAGTCTAATGCATGAGATCGGAA
	1056	56836368	16:A>T	TGCAGAAATGTTTTAGAAACCCATGTCAAAACAAAAATGTCTGTCTATTCTTATGCATGAGATCGGAAG
	1057	56836393	16:A>G	TGCAGAACTGATGCCGACACTGAGAACAAATAAAGTGCATGAGATCGGAAGAGCGGTTCAGCAGGAATG
	1058	56836394	10:T>C	TGCAGAACTGTCCAATCTGTGAGGAACCAAAAAATGCATGAGATCGGAAGAGCGGTTCAGCAGGAATGC
	1059	56836409	30:A>G	TGCAGAAGAGGAGGAGAGGACACAGGAGCCATTGCATGAGATCGGAAGAGCGGTTCAGCAGGAATGCCG
	1060	56836410	25:G>T	TGCAGAAGAGTGCTCTTTTACACTGGGAGGACTACTGTCCATTGATCCCCACTGAGCATGAGATCGGAA
	1061	56836481	13:G>A	TGCAGAATTGCCCGGGGACATTATGTATCCACATTGGATGATGATGACTCTTGGCATGAGATCGGAAGA
	1062	56836481	28:C>A	TGCAGAATTGCCCGGGGACATTATGTATCCACATTGGATGATGATGACTCTTGGCATGAGATCGGAAGA
	1063	56836495	6:C>T	TGCAGACACCTTAGCAATTGCCTCTCAGCGGAACAGCAATGCAGAGGTAAGAAAAAGCATGAGATCGGA
	1064	56836495	29:G>A	TGCAGACACCTTAGCAATTGCCTCTCAGCGGAACAGCAATGCAGAGGTAAGAAAAAGCATGAGATCGGA
	1065	56836529	13:C>T	TGCAGACATGTGCCGCACTGTTGATGTCTCCCTACTGTGGCATGAGATCGGAAGAGCGGTTCAGCAGGA
	1066	56836575	43:C>G	TGCAGACTAATTAGCTCATCTTTATCACTCACTCTGCTCTCTCCTCCTTTCAGCATGAGATCGGAAGAG
	1067	56836584	30:T>G	TGCAGACTCCAGCTCTGTGACTGGCCAGAGTTGCATGATGTCATTATTGCGCATGAGATCGGAAGAGCG
	1068	56836610	6:A>C	TGCAGAAATGTTTCAAATTTCTACACTGTTACTGTAGCTCACCCAAAGATTGCATGAGATCGGAAGAGC
	1069	56836625	11:A>G	TGCAGAGAAATAAATGTGTGTTGATCTTTGGGGTGCACACCCCAATACAGCATGAGATCGGAAGAGCGG
	1070	56836658	43:A>G	TGCAGAGAGACCACTGCTTCCACACAGAGAGGTCCTTTCTCCAAAGCATGAGATCGGAAGAGCGGTTCA
	1071	56836698	26:A>G	TGCAGAGCAAAATCTATTTCTGGCAAACTCACTGCTTTGGCATGAGATCGGAAGAGCGGTTCAGCAGGA
	1072	56836717	26:T>C	TGCAGAGCATTGAACAGAAACTGTCCTAGAAAACAGTAACTCCCAGCATGAGATCGGAAGAGCGGTTCA
	1073	56836784	32:A>G	TGCAGAGGTCACTTAGGGTCATTCACACCACAATGCATGAGATCGGAAGAGCGGTTCAGCAGGAATGCC
	1074	56836812	18:T>C	TGCAGAGTCTATCCGCAATGATCCTCGGCATGAGATCGGAAGAGCGGTTCAGCAGGAATGCCGAGACCG
	1075	56836866	16:C>T	TGCAGATACAGTGTGCCTTGCCGAGTCGTGCAGCTTATGCATGAGATCGGAAGAGCGGTTCAGCAGGAA
	1076	56836889	28:T>C	TGCAGATCAAACGCATCGCTCTGCAATCTCTGAACCTTATTTGCAAAGATGCATGAGATCGGAAGAGCG
	1077	56836903	7:C>T	TGCAGATCCAGACCTGGAGTGAATAACAGGTGGCTGGCTCCTGGGGTTTGCAGCATGAGATCGGAAGAG
	1078	56836906	39:C>T	TGCAGATCCTGACCTCATTTGAAGAACAGATGAATGGCTCATGGGGTTTGCAGCATGAGATCGGAAGAG
	1079	56836909	23:A>G	TGCAGATCGCAGGCCACATCTGGATTTAAATATGGTGTCAGGTGCCTGTGCATGAGATCGGAAGAGCGG
	1080	56836917	16:G>A	TGCAGATCTGATATAGGAGATGGGTAGAGATTGCAGGCATGAGATCGGAAGAGCGGTTCAGCAGGAATG
	1081	56836958	11:T>C	TGCAGATGTGGTGCTCCAGCGGCATGAGATCGGAAGAGCGGTTCAGCAGGAATGCCGAGACCGATCTCG
	1082	56836960	16:G>A	TGCAGATGTTATTGCAGCCTCAAGGTGACCTTGTTTGCATGAGATCGGAAGAGCGGTTCAGCAGGAATG
	1083	56836962	24:G>C	TGCAGATGTTTTTGTAACTTTGTTGTTTATGTCCTGTGTGCATGAGGCCTAACAAGCATGAGATCGGAA
	1084	56836962	33:C>T	TGCAGATGTTTTTGTAACTTTGTTGTTTATGTCCTGTGTGCATGAGGCCTAACAAGCATGAGATCGGAA
	1085	56836984	40:T>C	TGCAGATTGGTCCGACATCTGGTCTAACACCAACTTGTCCTTCCCTAGCATGAGATCGGAAGAGCGGTT
	1086	56837001	27:C>G	TGCAGCAAAACCTAACTTGCCTGCTCGCAGCCCTCTTGTGCATGAGATCGGAAGAGCGGTTCAGCAGGA
	1087	56837004	30:T>C	TGCAGCAAACACATTTCCATTTGAAAGGCTTGTTCTTTCATGATGCATGAGATCGGAAGAGCGGTTCAG
	1088	56837103	6:A>G	TGCAGCACTCAGACTGGGGAGGGATTGGCAGTACAAGGTGCCAATCAGGTGTACAGCATGAGATCGGAA
	1089	56837103	7:T>C	TGCAGCATTCAGACTGGGGAGGGATTGGCAGTACAAGGTGCCAATCAGGTGTACAGCATGAGATCGGAA
	1090	56837109	13:G>A	TGCAGCACTGGCAGCCTATAAATAAATGTGTTTTGCATTGTGTGCATGAGATCGGAAGAGCGGTTCAGC
	1091	56837110	16:G>A	TGCAGCACTGTGATAGGGAACGATAGGGGAAGATGCATGAGATCGGAAGAGCGGTTCAGCAGGAATGCC
	1092	56837374	14:G>T	TGCAGCCTCAAATTGTGTAGACCAGTCATCTACGGAGCATGAGATCGGAAGAGCGGTTCAGCAGGAATG
	1093	56837374	32:C>T	TGCAGCCTCAAATTGTGTAGACCAGTCATCTACGGAGCATGAGATCGGAAGAGCGGTTCAGCAGGAATG
	1094	56837395	6:C>T	TGCAGCCTGAGATTTTGTAGACCAGCTGTAACATCTACTGAGCATGAGATCGGAAGAGCGGTTCAGCAG
	1095	56837426	24:C>T	TGCAGCCTTGTCAACCATGTACATCCCAGGTGTAGACAATTGGCATGAGATCGGAAGAGCGGTTCAGCA
	1096	56837454	25:T>C	TGCAGCGCTGTGGGCGATGTGTAAGTGACAGCATGAGATCGGAAGAGCGGTTCAGCAGGAATGCCGAGA
	1097	56837483	13:T>C	TGCAGCTACAGCCTGCTCATGCTTATGCATGAGATCGGAAGAGCGGTTCAGCAGGAATGCCGAGACCGA
	1098	56837554	24:G>A	TGCAGCTCTGGATCTTTTGCACAGGGATGGCCTTTAAAGCATGAGATCGGAAGAGCGGTTCAGCAGGAA
	1099	56837632	22:C>A	TGCAGCTGTGAAGTGCACCCATCAGAAACCCATGCATGAGATCGGAAGAGCGGTTCAGCAGGAATGCCG
	1100	56837670	36:G>A	TGCAGCTTGCATGTACAGACTGCCATACAAGTGAATGGCAGCATGAGATCGGAAGAGCGGTTCAGCAGG
	1101	56837679	16:C>A	TGCAGCTTTCTGGTGCCTTTGCTCTTTGCATGAGATCGGAAGAGCGGTTCAGCAGGAATGCCGAGACCG
	1102	56837685	53:T>A	TGCAGCTTTTATTGCTGGACCATTACAAAGATCTTGACTGTCACAGAGAGCCATGCATGAGATCGGAAG
	1103	56837688	31:T>C	TGCAGCTTTTTGCAACAACAGAGAACACCCCTGTGCATGAGATCGGAAGAGCGGTTCAGCAGGAATGCC
	1104	56837698	27:T>A	TGCAGGAAACCAATACCAGATCTTTAATCCAAGCATGAGATCGGAAGAGCGGTTCAGCAGGAATGCCGA
	1105	56837756	24:G>A	TGCAGGACATGCTAGTCATTGGGGGAACTAAAGCATGAGATCGGAAGAGCGGTTCAGCAGGAATGCCGA
	1106	56837924	19:T>C	TGCAGGCAGGCTGGTAATGTGCTGGCCTGGGAAATGCATGAGATCGGAAGAGCGGTTCAGCAGGAATGC
	1107	56837932	30:C>G	TGCAGGCATCATGTCAGCGTGACTCCTCCTCAATTCACTGAGCATGAGATCGGAAGAGCGGTTCAGCAG
	1108	56837999	25:G>A	TGCAGGCTGATTTGTTAAATTGCACGGGACCACACAAAAACGAGTGCATGAGATCGGAAGAGCGGTTCA
	1109	56838007	6:C>T	TGCAGGCTGGATGCAGGCTTTGGCATGAGATCGGAAGAGCGGTTCAGCAGGAATGCCGAGACCGATCTC
	1110	56838022	17:T>C	TGCAGGCTTTGTGAAACTCTTGTCTCTTAGGATAAAGCTTTGCATGAGATCGGAAGAGCGGTTCAGCAG
	1111	56838031	32:C>T	TGCAGGGAAATTGCCTGGTGCTTTGCACCATGCATTTCAGCATGAGATCGGAAGAGCGGTTCAGCAGGA
	1112	56838200	39:A>G	TGCAGGTACATAGTAGTGACTTAGTAGCCAGTGGGTTGAACCACAGCATGAGATCGGAAGAGCGGTTCA
	1113	56838207	19:C>T	TGCAGGTAGACCACTGCTTCCACACAGTAAGCAAGGGTCCTTTTTTGCAGCATGAGATCGGAAGAGCGG
	1114	56838241	26:G>T	TGCAGGTCCTAATTTGACAGGCATGTGGATACACATGTTCAGAGGTGGCATGAGATCGGAAGAGCGGTT
	1115	56838246	41:A>G	TGCAGGTCTAGATAAATCACAGTACACCCGGCAGAGCCAATACAGCATGAGATCGGAAGAGCGGTTCAG
	1116	56838251	32:G>T	TGCAGGTCTTAGCCAGGAACCTCACAGAGGTGGTATGTCTGTGCATGAGATCGGAAGAGCGGTTCAGCA
	1117	56838265	38:T>G	TGCAGGTGCAGTGGCCACTCCTCATTGACAAATACTACTTTTAGCTTTCTTGCATGAGATCGGAAGAGC
	1118	56838268	16:C>T	TGCAGGTGCCCATCATCGTTTCCAACCTATTTTATTCATCTTTATGTTTATTCAGCATGAGATCGGAAG
	1119	56838271	9:G>A	TGCAGGTGCGATGCCTTTTGAAGATCCCTGCATGAGATCGGAAGAGCGGTTCAGCAGGAATGCCGAGAC
	1120	56838274	11:G>T	TGCAGGTGCTGGCTAAACTGTAGCAAGCAATTATATAGCATGAGATCGGAAGAGCGGTTCAGCAGGAAT
	1121	56838292	33:C>T	TGCAGGTGGTTTTGCCCTGGTCTTCCTGGTTCGCACCAGCAATGGCATGAGATCGGAAGAGCGGTTCAG
	1122	56838336	38:T>G	TGCAGGTTTGGCTGGTGATGTAAAGTCTCTTCTGCCTCTAGAAAGTCTAGAGATTGGCATGAGATCGGA
	1123	56838342	10:G>A	TGCAGTAAAAGCATCTGCTTTACCTGGCAGCATGAGATCGGAAGAGCGGTTCAGCAGGAATGCCGAGAC
	1124	56838344	11:C>G	TGCAGTAAAACCCAGCAGAATACACTTGGCATGAGATCGGAAGAGCGGTTCAGCAGGAATGCCGAGACC
	1125	56838367	32:C>T	TGCAGTAACCTGTGATCCCCACCACTGCATTGCAATAGACAGCGCAGAGCATGAGATCGGAAGAGCGGT
	1126	56838367	42:C>T	TGCAGTAACCTGTGATCCCCACCACTGCATTGTAATAGACAGCGCAGAGCATGAGATCGGAAGAGCGGT
	1127	56838371	25:C>T	TGCAGTAATATTAGTCGCTTCCATCCCGCAGGTCCTAAGCATGAGATCGGAAGAGCGGTTCAGCAGGAA
	1128	56838371	35:T>C	TGCAGTAATATTAGTCGCTTCCATCCCGCAGGTCCTAAGCATGAGATCGGAAGAGCGGTTCAGCAGGAA
	1129	56838377	15:C>T	TGCAGTACAAACTCCCGGCAGTCTGTGGGCTTTAGGCATGAGATCGGAAGAGCGGTTCAGCAGGAATGC
	1130	56838400	36:C>T	TGCAGTACTCAAGCCCAGCTAGCAAGAATAACTTGCCGCATGAGATCGGAAGAGCGGTTCAGCAGGAAT
	1131	56838414	9:T>C	TGCAGTAGCTCTCACTGAGATAGCCTAGTCAAAAGTGTCCTCCTGTTACTATTCAGCATGAGATCGGAA
	1132	56838414	33:A>C	TGCAGTAGCTCTCACTGAGATAGCCTAGTCAAAAGTGTCCTCCTGTTACTATTCAGCATGAGATCGGAA
	1133	56838419	19:G>C	TGCAGTAGGGTGCAATGCAGTGGATTGTGTTGCATGAGATCGGAAGAGCGGTTCAGCAGGAATGCCGAG
	1134	56838457	39:T>C	TGCAGTATTTTGGATTCTTCCATCACAGGAGAAGATCTGTCATCTGCATGAGATCGGAAGAGCGGTTCA
	1135	56838463	16:T>G	TGCAGTCAAGCACAATTTTTGTATCATGCATGAGATCGGAAGAGCGGTTCAGCAGGAATGCCGAGACCG
	1136	56838476	10:A>G	TGCAGTCAGGATGTTTCTTTTGCATGAGATCGGAAGAGCGGTTCAGCAGGAATGCCGAGACCGATCTCG
	1137	56838481	16:G>A	TGCAGTCATAGAGCTGGTGTTTTATGGGAAGCTACATCAGCATGAGATCGGAAGAGCGGTTCAGCAGGA
	1138	56838487	7:T>A	TGCAGTCTTGTCCAGGCAATAGGAATATGCAGTGGAGAGCGGAGCATGAGATCGGAAGAGCGGTTCAGC
	1139	56838505	46:C>G	TGCAGTCCATCTAAAACACATGTTGCCACACATCAACACACTTGTTCATGCATGAGATCGGAAGAGCGG
	1140	56838525	10:T>A	TGCAGTCTCATTGACCCCGAGCAAGTGGGATGAGATAACTTGGAGTATTTTGCATGAGATCGGAAGAGC
	1141	56838525	17:C>T	TGCAGTCTCATTGACCCCGAGCAAGTGGGATGAGATAACTTGGAGTATTTTGCATGAGATCGGAAGAGC
	1142	56838543	36:A>G	TGCAGTCTGCAAGTGGAGGAAGAGGATGGAACTACAAATCCCAGCATGAGATCGGAAGAGCGGTTCAGC
	1143	56838545	28:G>A	TGCAGTCTGGCAAATACCCCTTTTTGCCGCAATGGGTGCATGAGATCGGAAGAGCGGTTCAGCAGGAAT
	1144	56838554	33:G>A	TGCAGTCTTGGAAAGTGCAAATTTGCCCTCTGAGGAGTCACCAAAAGAGCAGGAGCATGAGATCGGAAG
	1145	56838580	16:G>A	TGCAGTGATATAGGGGGCTGGTAGGAGAAACCACAGCATGAGATCGGAAGAGCGGTTCAGCAGGAATGC
	1146	56838585	33:T>C	TGCAGTGATGATGTCCAACTAGTCTAAAACAGTTGCATGAGATCGGAAGAGCGGTTCAGCAGGAATGCC
	1147	56838588	30:G>T	TGCAGTGATGGAACACCAGCTGCTGCCAGTGCCGTCCGGAATGCATGAGATCGGAAGAGCGGTTCAGCA
	1148	56838597	45:C>T	TGCAGTGCAAGGAGTATGATGATAGGTGAGGTAGAGAGGTGAGCTCACCAGCATGAGATCGGAAGAGCG
	1149	56838600	34:A>C	TGCAGTGCAATGCATGTCCCACCCAGAAAGAGAAAATGGAAGGCATGAGATCGGAAGAGCGGTTCAGCA
	1150	56838612	19:C>T	TGCAGTGCACTGCCATACTCCTGCATGAGATCGGAAGAGCGGTTCAGCAGGAATGCCGAGACCGATCTC
	1151	56838623	27:T>C	TGCAGTGCCATGCAATTTGGTGTGGCATAGTTTTTAAAAGTAGTGCATGAGATCGGAAGAGCGGTTCAG
	1152	56838632	19:A>T	TGCAGTGCGCTAAGCTTTCAAAAGAAGCATGAGATCGGAAGAGCGGTTCAGCAGGAATGCCGAGACCGA
	1153	56838637	15:A>G	TGCAGTGCTACTCACATTTCTTCACGCATGAGATCGGAAGAGCGGTTCAGCAGGAATGCCGAGACCGAT
	1154	56838641	34:T>C	TGCAGTGCTCATGTGCTAACAAGTAATAGGCTCATCAGCATGAGATCGGAAGAGCGGTTCAGCAGGAAT
	1155	56838645	16:T>A	TGCAGTGCTGGAGGTCTTCCTTTGACAGGTAAGTCTGTTGTGCATGAGATCGGAAGAGCGGTTCAGCAG
	1156	56838651	16:C>T	TGCAGTGCTTCTTGTACTAACAAAGAGCATGAGATCGGAAGAGCGGTTCAGCAGGAATGCCGAGACCGA
	1157	56838658	20:G>A	TGCAGTGCTTTGTCCTTGGCGGTTTGATCCTTTAATATAACAGTTAGCATGAGATCGGAAGAGCGGTTC
	1158	56838678	7:G>A	TGCAGTGGCTGTAATATTGATCCACAATAATTCAGCATGAGATCGGAAGAGCGGTTCAGCAGGAATGCC
	1159	56838706	10:C>G	TGCAGTGTAACAGAAGTAGGCCTTCTTCCAATGCACTTCATATACAGTATATGCATGAGATCGGAAGAG
	1160	56838711	15:G>A	TGCAGTGTATAACTTGGGCGGATGGGGCTAGAGTCCCCCCTTGGTCCCATTCGTAGCATGAGATCGGAA
	1161	56838732	41:C>T	TGCAGTGTGCATGAGCCCTTAAGCTGAATTCCAGGCATACTCCATCAGCATGAGATCGGAAGAGCGGTT
	1162	56838741	44:G>A	TGCAGTGTGGGCATCTGAAGCAGAAGTCCTTCTTCCTGGATTCCGTGCATGAGATCGGAAGAGCGGTTC
	1163	56838744	45:G>A	TGCAGTGTGTGAAACGATGGAAAGCACAGCAGGTGTCTCTTACTCGTGCTGCATGAGATCGGAAGAGCG
	1164	56838767	15:C>G	TGCAGTTAAGCACACCTCTTCCTGATGAAGCATGAGATCGGAAGAGCGGTTCAGCAGGAATGCCGAGAC
	1165	56838810	49:A>C	TGCAGTTCCTCCCTCCCCTCACTTTATGGTCTCTCGGCTTTACGAAGGCAGCATGAGATCGGAAGAGCG
	1166	56838833	21:A>G	TGCAGTTGACCCTCTCATGACACGCATGAGATCGGAAGAGCGGTTCAGCAGGAATGCCGAGACCGATCT
	1167	56838837	17:A>G	TGCAGTTGATGCTCTACATAAGCTTTGCTATCAAACAGCATGAGATCGGAAGAGCGGTTCAGCAGGAAT
	1168	56838840	26:G>T	TGCAGTTGCCACAAGCAACTGTGACAGTTATTATTCACAGCATGAGATCGGAAGAGCGGTTCAGCAGGA
	1169	56838848	28:A>T	TGCAGTTGGCCATTCCAATCACAAGCTAATAGCAGCATGAGATCGGAAGAGCGGTTCAGCAGGAATGCC
	1170	56838866	27:C>T	TGCAGTTTACTACCACTTTAAGTTCTGCGGCATGAGATCGGAAGAGCGGTTCAGCAGGAATGCCGAGAC
	1171	56838885	39:G>A	TGCAGTTTCTGCAAAAAAATGCAGGATAGTGAACTACAGGTGGCATGAGATCGGAAGAGCGGTTCAGCA
	1172	56838903	20:T>G	TGCAGTTTTCCCCTGTATCCTGTTTCCAGTGCATGAGATCGGAAGAGCGGTTCAGCAGGAATGCCGAGA
	1173	56838906	34:A>C	TGCAGTTTTCTGCTTTTGTATTCTTACCTCCTTGATGCATGAGATCGGAAGAGCGGTTCAGCAGGAATG
	1174	56839753	39:C>T	TGCAGACAGACCACTGCTTCCCCACAGAAAGCAAGGGTCCTTCTCTGGAGCATGAGATCGGAAGAGCGG
	1175	56839910	17:T>A	TGCAGGTACAGTACAATTTTAAAAGTCTTGCATGAGATCGGAAGAGCGGTTCAGCAGGAATGCCGAGAC
	1176	56839911	5:G>A	TGCAGGTATGTGTCACATAATGTGCTAGTATGCAATGCATGAGATCGGAAGAGCGGTTCAGCAGGAATG
	1177	56839964	27:G>A	TGCAGTTCGGGGGAAGGTGCACACTCCGCTACTCCTCCAGCAGTCTATGAAGCATGAGATCGGAAGAGC
	1178	56840030	52:C>T	TGCAGAAAGAACGTTCAGGTGCATGTAATTAGCATCCGGCCGTTTTGGACTTCGGAGCATGAGATCGGA
	1179	56840157	8:C>A	TGCAGCTGCGATTTTAAAAATGCGCATGAGATCGGAAGAGCGGTTCAGCAGGAATGCCGAGACCGATCT
	1180	56840214	8:C>G	TGCAGGTGCGGTGCATTTTTAAAAATCATGCATGAGATCGGAAGAGCGGTTCAGCAGGAATGCCGAGAC
	1181	56840222	34:T>C	TGCAGGTTAAGATTGTGTAGACCAGCTGGTGCTCTCTACTGAGCATGAGATCGGAAGAGCGGTTCAGCA
	1182	56840234	18:A>G	TGCAGTGCACATGTGCTGATGATGGGCATGAGATCGGAAGAGCGGTTCAGCAGGAATGCCGAGACCGAT
	1183	56840235	9:C>A	TGCAGTGCTCATGTGCATGTAAGGAGCATGAGATCGGAAGAGCGGTTCAGCAGGAATGCCGAGACCGAT
	1184	56840251	23:G>A	TGCAGTTTGGATCCCAGAATTGGGACTTAGCATGAGATCGGAAGAGCGGTTCAGCAGGAATGCCGAGAC
	1185	56840434	66:A>G	TGCAGAAGAAGCTTTGGGGGACAGGGGACTACAGCTGTTCATTTTGTGTTCTGTACTACCTTGCCTAGG
	1186	56840545	8:C>T	TGCAGACACGCAACAGTATATAACAGTCATATACAGTCATAATAGTCAGATACAACAGGCATGAGATCG
	1187	56840545	37:C>A	TGCAGACACGCAACAGTATATAACAGTCATATACAGTCATAATAGTCAGATACAACAGGCATGAGATCG
	1188	56840588	62:T>C	TGCAGACATGCAGTGCTCTGTCCCCCAGCCCCTGCTGCTACAGGGTGAGGGAGAGTGCACTGTGCATGT
	1189	56840863	9:C>A	TGCAGATATCAACTGTGAATAATGGGAGTTAAAAGCTTATGGATTAGGGATGTTTCTGCTTCAGGACCA
	1190	56840900	14:A>C	TGCAGATCATACAGAGGCTAAGATAGCATCTTCCTTGGCTGTAAAGGATAAAAGGGATTAGTTCCACTT
	1191	56840900	25:G>T	TGCAGATCATACAGAGGCTAAGATAGCATCTTCCTTGGCTGTAAAGGATAAAAGGGATTAGTTCCACTT
	1192	56840930	43:C>T	TGCAGATGAATCTTTCCTCCCACTTATGTAGAACTGTGTATGCCGAACAAGAGGATGGCATGAGATCGG
	1193	56840940	39:C>T	TGCAGATGATTGGATGATGGACATCAGGTTCCTAGTAAACCATCCCCTGCTTTGTCTATTTAAAGTGCA
	1194	56840949	28:C>T	TGCAGATGCTGGAACATGTTACTTGTTCCACCCAAAAAATGTAACAACCAAAAACAAGGAAAAGGAATG
	1195	56840989	52:G>T	TGCAGATTCATGACACATAGGTACAGTTGCTAGTACAGCATGTGTTCTTCAGGGTACAGATATACATTG
	1196	56841016	38:A>G	TGCAGATTTCTTCTGAAGGCTCGAATCAGTCCAGGGGCATGGAGGTTTCTTTCGGGTTCCCATGAGTTC
	1197	56841020	36:A>C	TGCAGCAAACATGGATCGGGTGTATAGGAGACATACATAGACCTGATTGGCTGCCCTATGGAAATGAAA
	1198	56841106	50:A>G	TGCAGCAGAAAAAAGTGAAGGTACTGAAGGGGCCATCACAATCTCTTGACAACAAAATCATTGATCCAC
	1199	56841146	33:G>A	TGCAGCAGTAATCCCCTCAAATCAGTCATTAGCGGCAATTTTGTGCATCAAATAGTTTAATGAGTCGGC
	1200	56841180	50:G>A	TGCAGCATGAGAAGTCAGGACAAACTGCAATTGCTGCAACATCTTCTGACGTTGCTAAACTGGATGAGG
	1201	56841236	40:G>T	TGCAGCCAGAGGAGGAGAGAGAGCCAGCCTGTGCACAGCGGGCAGTGTGACTGTCTGGGAGTAGCCTTA
	1202	56841305	60:C>T	TGCAGCCTCAATTTAGCTCATTAATTTCACACCAAACTTCAGTTGGGCTTCAATTGTAATCTACAGCAT
	1203	56841388	8:A>C	TGCAGCGGAAGCACATGCAGCAGAGGGCCTTCAATGAGTACCTGTGAGTATGGCACAACAACAGGCTCA
	1204	56841417	6:G>A	TGCAGCGTCTGCATATCATTTCCTAGCCCTGGTGCCAGAATGCGGGAGTTTAGTGCAGACAATTGCTGT
	1205	56841468	41:G>A	TGCAGCTATAGGAAAGCTCCTATGTATGGAATGCATAAGAGGTGTTGCCACTGTTAAGGAAGCTGAGGC
	1206	56841479	49:C>A	TGCAGCTCACAGTGGGAGGGTTCCAGCATGACAGTCGGTTATGCCAATCCAAAAGGTAGTGGGCATGAG
	1207	56841515	8:T>C	TGCAGCTCTGAACCCCTGGCTCCTCCTACCCTGCACACTTCTCTTTTTCTCCCTCCCACTGGCTGTCAG
	1208	56841529	35:G>A	TGCAGCTGAAATCAACAAATTGCCCACAGGCCTTCGCCCAATAAAGGGTTGGCTAGTCCACAATTTAAA
	1209	56841542	35:A>C	TGCAGCTGATGTTTCCATTAGCTGTCAGGTGCTGAAACCGCCATTACGGGTAAGGGAACCCGGCAGTGA
	1210	56841555	52:C>T	TGCAGCTGCCATTGAAGGTAAGGGAGCCTGACAGTGGAGCCTTTTGGCTTCACGCCGGGCCTCTACTGA
	1211	56841615	28:G>C	TGCAGCTGTGCAAGGGGTTAACTGAAAAGCTGTGCTTTGGTGATACCTTTCTGTACCACATGCAGCATG
	1212	56841769	59:C>G	TGCAGGAGAGGACTTTTCCAATGAAGAAACTCCTGGGGAGAAAGTGATGAGGCTTACACCAAGAGAAGC
	1213	56841856	35:T>G	TGCAGGCAACCACCCACAATGAAAACGCGCTGCTGTGAACACGTGCAGGGCTGCCATTCATTCTGCATG
	1214	56841886	53:T>C	TGCAGGCAGGGGTGATTTAGGTTTATGCGTAAATATGCTATAGGCACACATTTTGCCTATTTCTGCCTT
	1215	56842129	18:T>A	TGCAGGTAACGTTTTCTGTAAAGTGACTAAGGGACGAGATCTTATAACGCCGATTTGGCCGCCTGGCAT
	1216	56842134	40:C>G	TGCAGGTAAGGGCAATCTGCCCATTCTGCCTTGCAAAGTACAGCTGTCACCACAGCCAACACCCTACAG
	1217	56842134	54:G>C	TGCAGGTAAGGGCAATCTGCCCATTCTGCCTTGCAAAGTACAGCTGTCACCACAGCCAACACCCTACAG
	1218	56842162	33:T>C	TGCAGGTATAGGTGGCTGATCCTTCCTACCCTCTAGTATTGACACCCCCCGCCTGGCTGCGTTCCCCTG
	1219	56842217	9:G>T	TGCAGGTCTGTGTATTTCTATTGATGCACACAGTGTAGGGAGTGACAACGCTAGTCCCTGCATGAGATC
	1220	56842272	31:C>T	TGCAGGTTATGGAGAGTGAGATCAATGTCTTCTATAAGGAGCTAAGTGGCCCTTCTCCTGGATTTCAGC
	1221	56842297	10:C>T	TGCAGTAAAACTGTGTTGTGAATATGCATACTTCTCTCAGCCAACCAGTAGGAGTGTTCCCCCACTGTT
	1222	56842323	26:C>T	TGCAGTAAGTGTTTAACCTTGTCTTGCATTATGTATGGGCAACGTATTTCATATGCAGAAGGCAGCGTG
	1223	56842423	10:C>A	TGCAGTAGTTCCAATACACTTTTTTCAAGCAAATCATGTTCATACATGACACTATATGGCATGAGATCG
	1224	56842445	13:G>C	TGCAGTATCAGTGGTTTGATAAGCAGGCGATTTGTAGAAACCTACTTGTTTGGCTAAGAGAAAGCATGA
	1225	56842524	17:C>T	TGCAGTCATCTCCAGCACGTGCACCGTATTCCGCATGGTCCAGCCGTGTCTAGGTCTACACTGAGCAGG
	1226	56842557	9:T>A	TGCAGTCCCTTAGACTACTATTTGGTTGCACATTTTTGTAGGGTTTTCTGAAAGTGCACCAAAGATGTA
	1227	56842597	56:C>T	TGCAGTCTGACTGTCTCCTGTGCTATGTGTGCAGTCTCTGACCATCGCCTGTAGTACGCATGAGATCGG
	1228	56842654	22:A>G	TGCAGTGACAGAACGGGGATCCATGTGTGTAAACACGCCGAACTCCGTTCTGACAGGGGAGAAGGAATG
	1229	56842665	44:G>A	TGCAGTGACTGCCATTTGTTGTAGTCATCTTCCTGCTGGGGAGTGCTGTGTGTTTCCAGCAACTTCCCC
	1230	56842825	62:A>G	TGCAGTGGGATGAGACCATCAGATTAGTTAAGACTCCCAGACAGAGGAGGAGGGATTGCTGGAGCATGG
	1231	56842838	15:A>C	TGCAGTGGGTTGATCAGTCACATGCCCTGGGAATATTTTCCAGTCCGGAGGATGGTGAGCTATGGCTGT
	1232	56842849	32:G>A	TGCAGTGGTTCTAGGCATTGCACCACCCAGCCGTGACGCTCGCTGACACGTTCTGTCTCCACTTTCAAG
	1233	56842887	6:G>A	TGCAGTGTGAACCCAACCTTAAAATAGTCACCGGAGCAGATTGCCTATGCATTCACTTTATGCATGAGA
	1234	56842939	12:T>C	TGCAGTGTTTTGTCGATTACAAAGTGGCAGATGCTCTTTAACGATTGTTCCATCTTTTGTTTCCCAAGC
	1235	56842956	26:T>C	TGCAGTTACAGCTGCTGTATTCTCTCTACACTTACCATGTAATGATTGCATAGTCACATCATTCAGCAT
	1236	56843037	58:A>C	TGCAGTTGCCACAGTGCTGCACATGCAAGCTATGGCACCAGCTATTTGATGGCTTGACAGTTCAGTTGC
	1237	56843073	18:G>A	TGCAGTTGGGTTCTGCTCGCCTGTATGTGTTGAGGTTCCTTCTGGGACAGAGGCCGTGCGAGGACAGAA
	1238	56843080	22:T>C	TGCAGTTGTATGAGGAGGATTTTGATTTTTTGGGAATTTCAGAGACTTTGTTCAACAGTACGCATGAGA
	1239	56843096	8:A>T	TGCAGTTTAATAAAGGCTCTGATACACGCATATTTAAAATGACCTTCAAGTAAAGTAGACTGAGATTCA
	1240	56843105	31:T>C	TGCAGTTTAGTGTGAAAGACAAAGGGGAAACTTTATGGGTCCATTGTGTGCGTTACCATGCATGAGATC
	1241	56844012	6:A>G	TGCAGAAATTCCGCTGTGGGAGATCGGAACGGCTTTAAAAAATGGTATGCATGAGATCGGAAGAGCGGT
	1242	56844017	43:C>T	TGCAGAACAAATATCAACTACATCGTTCCAGTTTCTATAGGTACCTACAGCGTCGGCATGAGATCGGAA
	1243	56844062	9:C>T	TGCAGAAGCCGCTAGCAATAATCGCAGTAAAACCCAGCATGAGATCGGAAGAGCGGTTCAGCAGGAATG
	1244	56844062	19:A>T	TGCAGAAGCCGCTAGCAATAATCGCAGTAAAACCCAGCATGAGATCGGAAGAGCGGTTCAGCAGGAATG
	1245	56844078	33:G>C	TGCAGAAGGTATGGTGGTTGGCAGTGTGTGCAGGAGAGGCATGAGATCGGAAGAGCGGTTCAGCAGGAA
	1246	56844179	21:A>G	TGCAGACATGGCTGATCAGTCAAACTTGATACGCAGCATGAGATCGGAAGAGCGGTTCAGCAGGAATGC
	1247	56844468	32:A>G	TGCAGATAAACACTTCTTCTCTTGGGTAAGATACAAGCATGAGATCGGAAGAGCGGTTCAGCAGGAATG
	1248	56844474	29:G>A	TGCAGATAATACTGGGGTGCCTTGTTGTGGCTTCTGCATGAGATCGGAAGAGCGGTTCAGCAGGAATGC
	1249	56844482	34:C>T	TGCAGATAGCACCACCCGCAGTGGAGAATGTAGACGGCACATGCCTACAAGCATGAGATCGGAAGAGCG
	1250	56844498	24:C>T	TGCAGATCCACACATGTGGCCTGGCATGGTTCAGGAGGAGGAGGTGCATGAGATCGGAAGAGCGGTTCA
	1251	56844498	44:T>A	TGCAGATCCACACATGTGGCCTGGTATGGTTCAGGAGGAGGAGGTGCATGAGATCGGAAGAGCGGTTCA
	1252	56844512	13:A>T	TGCAGATCTAGCGATAAGAGCATGAGATCGGAAGAGCGGTTCAGCAGGAATGCCGAGACCGATCTCGTA
	1253	56844520	10:C>T	TGCAGATCTTCCCAGAACAGAAGTTCAGCCAAAGCATGAGATCGGAAGAGCGGTTCAGCAGGAATGCCG
	1254	56844540	27:T>C	TGCAGATGGAAGCTGCCATTTTCAGGCTCCCATAATGCATGAGATCGGAAGAGCGGTTCAGCAGGAATG
	1255	56844569	11:G>A	TGCAGATGTGCGCAAATACAGAACAGCATGAGATCGGAAGAGCGGTTCAGCAGGAATGCCGAGACCGAT
	1256	56844607	40:T>C	TGCAGATTTTCAGACTTTGTGGTAAAAGTATTCCAGTGTGTGCATGAGATCGGAAGAGCGGTTCAGCAG
	1257	56844750	16:C>A	TGCAGCAGATTGAACACCTAGTGCATTTTGAGCATGAGATCGGAAGAGCGGTTCAGCAGGAATGCCGAG
	1258	56844854	17:C>T	TGCAGCCAAGCACACTACTCATTACCTTATGCATGAGATCGGAAGAGCGGTTCAGCAGGAATGCCGAGA
	1259	56845015	14:A>T	TGCAGCCTTGTGTAAACCAGCCATTTCCACATGTACTGAGCATGAGATCGGAAGAGCGGTTCAGCAGGA
	1260	56845058	16:T>C	TGCAGCGTGCACCAAGTTGTGTGGTGAATGGGTTAAATATCGGCATGAGATCGGAAGAGCGGTTCAGCA
	1261	56845058	34:A>G	TGCAGCGTGCACCAAGTTGTGTGGTGAATGGGTTAAATATCGGCATGAGATCGGAAGAGCGGTTCAGCA
	1262	56845145	9:G>A	TGCAGCTGCGATACAGCAGAGCTGGGCAGGGAGCGTGACTGTGGGAGAAACAGGCATGAGATCGGAAGA
	1263	56845237	12:C>T	TGCAGCTTTACTCTAGCCGATATATATGGCATGAGATCGGAAGAGCGGTTCAGCAGGAATGCCGAGACC
	1264	56845241	37:T>C	TGCAGCTTTGTGCTGCCAGTTAAAGGACTAATTTTCATCACAATACCTAGCATGAGATCGGAAGAGCGG
	1265	56845467	5:G>C	TGCAGGCACAGGCTGGCCCCAGCACAAAGCGATGGCATGAGATCGGAAGAGCGGTTCAGCAGGAATGCC
	1266	56845468	11:T>A	TGCAGGCACAGTGTGCAGTGGGTGTGAGTGTGTGCCAGCAGCGGCATGAGATCGGAAGAGCGGTTCAGC
	1267	56845470	18:C>T	TGCAGGCACATTCAACTTCACCCAGTCTTCCTTCTGAGTTTGCATGAGATCGGAAGAGCGGTTCAGCAG
	1268	56845470	33:C>T	TGCAGGCACATTCAACTTCACCCAGTCTTCCTTCTGAGTTTGCATGAGATCGGAAGAGCGGTTCAGCAG
	1269	56845471	20:G>T	TGCAGGCACATTTTTTATGAGGTGTGCATGAGATCGGAAGAGCGGTTCAGCAGGAATGCCGAGACCGAT
	1270	56845480	16:G>A	TGCAGGCAGCAGTAGGGGGAGAGCAATCCTGAACCAACAAACCGCAAATGAAAGGCATGAGATCGGAAG
	1271	56845483	32:A>G	TGCAGGCAGGAGATGAGTTGGAGGAGGATGCCATTGAGCCGGTCCCCTAGGCATGAGATCGGAAGAGCG
	1272	56845483	47:T>C	TGCAGGCAGGAGATGAGTTGGAGGAGGATACCATTGAGCCGGTCCCCTAGGCATGAGATCGGAAGAGCG
	1273	56845489	35:G>A	TGCAGGCAGTGTAGCTGGGAGCAGTTCTACAGGGGGATAAAAGATACTCCTGCATGAGATCGGAAGAGC
	1274	56845515	16:C>T	TGCAGGCCATGTTCTGCGGGAAATGCAGGCATGACATCCCATTGAAATGAATGGCATGAGATCGGAAGA
	1275	56845546	8:G>T	TGCAGGCTGAGACTTCAACCAAACCAGCTGTTGTCATCTACAGAGCATGAGATCGGAAGAGCGGTTCAG
	1276	56845763	32:A>G	TGCAGGTATCCTGAATGATGAGCCATAATCACACAGGGACTTTTTGATGGCATGAGATCGGAAGAGCGG
	1277	56845764	43:T>C	TGCAGGTATGCAAGGTACTGTATTTTGTATGATGTCAACCAGGTATGTGTAGCATGAGATCGGAAGAGC
	1278	56845765	22:T>A	TGCAGGTATGGATGCTGACCAATCTCTTCTGTTACACCAAAATAGCATGAGATCGGAAGAGCGGTTCAG
	1279	56845767	37:G>T	TGCAGGTATGTGATTGCCATGTGTCTGCATGATTCATGCCATTTGTGCATGAGATCGGAAGAGCGGTTC
	1280	56845790	20:C>T	TGCAGGTGATGCTTCCTAAGCAAATGACAGCATGAGATCGGAAGAGCGGTTCAGCAGGAATGCCGAGAC
	1281	56845851	19:C>G	TGCAGTAAACTACACCTACCTGCCTGATAACAGCATGAGATCGGAAGAGCGGTTCAGCAGGAATGCCGA
	1282	56845856	29:A>G	TGCAGTAAATCTACTGTGGGAGGGTGCCAAGTAGTTAAGAGCAGGCATGAGATCGGAAGAGCGGTTCAG
	1283	56845864	22:G>C	TGCAGTAACCCCTTCTTGAATGGACTGGAAGTTGCAGGTACAGACAGCATGAGATCGGAAGAGCGGTTC
	1284	56845909	8:G>A	TGCAGTAGGAAATTAGTCCAAGGAATGCATGAGATCGGAAGAGCGGTTCAGCAGGAATGCCGAGACCGA
	1285	56845916	26:C>T	TGCAGTAGTGCCAGAATGAATGATTCCTTGACTCCTGTATGCATGAGATCGGAAGAGCGGTTCAGCAGG
	1286	56845946	23:C>T	TGCAGTCAATCTACACTCTTCTGCATTGCATGAGATCGGAAGAGCGGTTCAGCAGGAATGCCGAGACCG
	1287	56845969	9:T>A	TGCAGTCATTTGCATGTAACTGCGCATGAGATCGGAAGAGCGGTTCAGCAGGAATGCCGAGACCGATCT
	1288	56845972	43:T>C	TGCAGTCCCTAACTCTGATTTTTAAGAGTCTCCACAATGGAAGTGCATGAGATCGGAAGAGCGGTTCAG
	1289	56845982	41:C>T	TGCAGTCCTCTCCAAAACCTGCACTGAGAGGAATGAAGGTGCAGCATGAGATCGGAAGAGCGGTTCAGC
	1290	56846011	7:T>C	TGCAGTCTCTGCCCTTCTACCCGGCATGAGATCGGAAGAGCGGTTCAGCAGGAATGCCGAGACCGATCT
	1291	56846018	14:C>T	TGCAGTCTGACCTGCTGTAAGTGGGTTTAGCATGAGATCGGAAGAGCGGTTCAGCAGGAATGCCGAGAC
	1292	56846023	25:A>G	TGCAGTCTTCATTAAAACTCCCAACACTGGCAGCATGAGATCGGAAGAGCGGTTCAGCAGGAATGCCGA
	1293	56846053	14:G>A	TGCAGTGATAATCGGTGGATGTGAAATAAAGCATGAGATCGGAAGAGCGGTTCAGCAGGAATGCCGAGA
	1294	56846065	19:C>T	TGCAGTGCAACCCCAAATTCCTGCATGAGATCGGAAGAGCGGTTCAGCAGGAATGCCGAGACCGATCTC
	1295	56846067	19:G>T	TGCAGTGCACCATTCAAGTGAAGACTAAAGCAATGCACCTGTATTGGCATGAGATCGGAAGAGCGGTTC
	1296	56846067	37:C>A	TGCAGTGCACCATTCAAGTGAAGACTAAAGCAATGCACCTGTATTGGCATGAGATCGGAAGAGCGGTTC
	1297	56846068	24:G>T	TGCAGTGCACCTCTCCATGTCTTCGGCATGAGATCGGAAGAGCGGTTCAGCAGGAATGCCGAGACCGAT
	1298	56846077	9:G>T	TGCAGTGCAGGGTGACACTGACACAGCATGAGATCGGAAGAGCGGTTCAGCAGGAATGCCGAGACCGAT
	1299	56846082	6:G>A	TGCAGTGCATTATGAAACTCTTTCAGCCAACCAGTAGGAGTTTCAGGCCACTGAGCATGAGATCGGAAG
	1300	56846082	38:C>A	TGCAGTGCATTATGAAACTCTTTCAGCCAACCAGTAGGCGTTTCAGGCCACTGAGCATGAGATCGGAAG
	1301	56846096	35:C>T	TGCAGTGCTGACTGTGTCCTAATATGGCCCCTGCTCAGACTTGGCATGAGATCGGAAGAGCGGTTCAGC
	1302	56846119	9:C>T	TGCAGTGGTCGGATTATTTTCCATTTGTGGTACTGAGCATGAGATCGGAAGAGCGGTTCAGCAGGAATG
	1303	56846132	14:C>G	TGCAGTGTAGCCTGCATGGATTTTACCACACAATGCATGAGATCGGAAGAGCGGTTCAGCAGGAATGCC
	1304	56846135	28:T>C	TGCAGTGTAGTTTGCACACCCCAAACTGTTGCACTCCCAGCATGAGATCGGAAGAGCGGTTCAGCAGGA
	1305	56846146	33:G>A	TGCAGTGTCCAATGAACTGATGACAATTCACCCGTTCAGCATGAGATCGGAAGAGCGGTTCAGCAGGAA
	1306	56846157	36:G>A	TGCAGTGTGAACCGGCCCTTAAAGTGCACCAAAGATGCAGCATGAGATCGGAAGAGCGGTTCAGCAGGA
	1307	56846163	44:C>T	TGCAGTGTGCTGATCGAAGCAGACTACAGCGATTTTATGACTTCCCAGCATGAGATCGGAAGAGCGGTT
	1308	56846179	12:C>A	TGCAGTGTTAAACTGCCTGGGATGTTGCCAGGTCAGCATGAGATCGGAAGAGCGGTTCAGCAGGAATGC
	1309	56846180	53:A>T	TGCAGTGTTCAAATGATCCATACCGTGAATGGAAAATGAATTTAAGTGAGTTTACAGCATGAGATCGGA
	1310	56846182	30:C>T	TGCAGTGTTGAATGTGTGCCAACAGGATTGCAGCATTGTCTTGCAGCATGAGATCGGAAGAGCGGTTCA
	1311	56846184	7:T>C	TGCAGTGTTGTAGTTGAAACATGGCAGAGAGCATGAGATCGGAAGAGCGGTTCAGCAGGAATGCCGAGA
	1312	56846186	23:T>G	TGCAGTGTTTAATTTACATTCAGTCTACTATGACATGCACAGTGCATGAGATCGGAAGAGCGGTTCAGC
	1313	56846215	16:C>A	TGCAGTTCATCTTGTACAGTAAAATGCATGAGATCGGAAGAGCGGTTCAGCAGGAATGCCGAGACCGAT
	1314	56846217	10:A>G	TGCAGTTCCAACCAGTTAGCAACAGTGGGCATGAGATCGGAAGAGCGGTTCAGCAGGAATGCCGAGACC
	1315	56846232	10:G>A	TGCAGTTCTGGTATCACTTTAAAAACCACTAAGGAGGTCAGGCATGAGATCGGAAGAGCGGTTCAGCAG
	1316	56846245	48:T>A	TGCAGTTGCAACAGCTGCTAGGAGAGACACACAGATGACCAGATCTTGTAATTGCATGAGATCGGAAGA
	1317	56846266	8:T>C	TGCAGTTGTAGTGTGTGGTGGTAGGCACTGAGCATGAGATCGGAAGAGCGGTTCAGCAGGAATGCCGAG
	1318	56846266	29:G>T	TGCAGTTGTAGTGTGTGGTGGTAGGCACTGAGCATGAGATCGGAAGAGCGGTTCAGCAGGAATGCCGAG
	1319	56846277	34:A>C	TGCAGTTTAGACACCCTTGATTTAAGGTATATTAAAATGCACTAAATGCATGAGATCGGAAGAGCGGTT
	1320	56846287	5:T>C	TGCAGTTTCCCTGTCTTGTCAAATAAATGATTACTATTCAGTACAACACAGCATGAGATCGGAAGAGCG
	1321	56846970	24:T>C	TGCAGCCTCTTTGCAACCACTCCATGTTTACATGCATGAGATCGGAAGAGCGGTTCAGCAGGAATGCCG
	1322	56847052	28:G>A	TGCAGTCTCTGACCATCTCCCATACCATGTCGGCATGAGATCGGAAGAGCGGTTCAGCAGGAATGCCGA
	1323	56847061	20:A>G	TGCAGTGCAGTGCAAAACACATGCAATATCGCACAGCATGAGATCGGAAGAGCGGTTCAGCAGGAATGC
	1324	56847184	23:G>T	TGCAGATATGCGTCTCTTGTGCAGGGCTGTCTTTTACCAGCACGGGGATGCATGAGATCGGAAGAGCGG
	1325	56847218	16:G>A	TGCAGCCTGAGATTGCGTAGATCAGCTGGTGTCCTCTACTGAGCATGAGATCGGAAGAGCGGTTCAGCA
	1326	56847219	28:T>C	TGCAGCCTGAGCTTGTGTAGACTAGCTGTTGTCATCTAATGAGCATGAGATCGGAAGAGCGGTTCAGCA
	1327	56847235	17:G>A	TGCAGCTACTGAAGCCAGCAGATTATTGGCATGAGATCGGAAGAGCGGTTCAGCAGGAATGCCGAGACC
	1328	56847289	42:C>T	TGCAGGTGTTCTGTCAGATTAGGGAACCAGGTAGCGGTGGAACGCATGAGATCGGAAGAGCGGTTCAGC
	1329	56847296	17:A>G	TGCAGTACTGCATGGCCACAAGAGCCCCAAGTTACACGACTGCATGAGATCGGAAGAGCGGTTCAGCAG
	1330	56847686	28:T>C	TGCAGACGGGAAAAGCGAGAATTGTGCCTGAGACATTTCCCCAGCAGGGAGCTGCTGTGTGTCCGTCTT
	1331	56847841	43:G>C	TGCAGAGGCTTCCATCTTCACCTGGTCTTCCTTCTGGGTTAGGGGACTCCAGAGCATCTGATTGGCCAA
	1332	56847961	40:A>G	TGCAGATATTCCAGAGAAGGTCGGGAAGAATGGAGTGGTTACAATGTGACACGGAACTATGAAAAGCAG
	1333	56847974	7:C>A	TGCAGATCAAGGATATCTGATCAGGAGACTACAGTTCCCACAATGCTCTCTGCTTGGCTTAGTATGATG
	1334	56847994	26:G>A	TGCAGATCCCTTGTGCCGCCATCTTGGATTTGGGAGCTGGTTATAACTTCATGATGTCCCACAGTGGCT
	1335	56848319	9:G>A	TGCAGCATAGTGACCACAAGGTCTCACTTGTTCATCATAATCACCATTCACTGAATACCTTGCATTGTT
	1336	56848531	61:G>C	TGCAGCCTTAATCATAGCCATGGCTATGATTAAAGTGTTACTAAACCCACAACAGTAAAATGAGTCTGT
	1337	56848650	67:G>A	TGCAGCTACTGCTCATTACTGTGCAGCTAATGCTCTTACTTATGTACCAGCACACAGACGAGCTCAGGC
	1338	56848688	24:A>C	TGCAGCTCCAATAGCCCCTATGTTAATCCGGCCCTGTACATGTGTTCAGCTTCTGATTGATGGCATGAG
	1339	56848701	20:C>G	TGCAGCTCCGTGTATCCATTCAGACACCGAGCTGCGATACGGCCCCCTGCTCCCTCTCTTTCCTGATTG
	1340	56848793	8:C>A	TGCAGCTGCTGCCTGCCTGCAATAAATGTACTGTGGGTGGGCGGAAAATGGTTAAGATTGCATCAAATA
	1341	56849042	41:G>A	TGCAGGATAACCCTGCGAAGACTAAACATAAAGATTAAATGGAATTCTGATGAGGCGCGGTGACCTTTC
	1342	56849090	48:C>T	TGCAGGCACTCCCATCTTCACCCGTCTTGCTTCCGGGTTCACAGACTCCGATTCTGTGACTCTGTGTCT
	1343	56849121	13:C>T	TGCAGGCATCATTCAGATTTCTACACTCAAAGTCCAGGACGTCATATGATGTCCACCTAGGGGGAAGTG
	1344	56849177	46:T>C	TGCAGGCTAGCTAGCAATGTCACCCTGTTTAACATGTTACTAAACCTACAACAGTAAAATCAGTCTGTA
	1345	56849182	9:A>G	TGCAGGCTCAGAATCTGAGGTTGGCTGATATTTTTTCAAAACATCCCCATGGCCAGTACAAAGTAGCAT
	1346	56849228	24:C>T	TGCAGGGAAAACGCATTGTCAAAACGGCCTTGCGATTCTCTGTGAGCCTAATTTTGAAATAGGTGCATG
	1347	56849275	11:G>A	TGCAGGGCTGGGGGAAGAAGCAGCACAAGTAACCAGTCAGTTCATGTGCTGACAAAAAGCATGAGATCG
	1348	56849534	28:G>T	TGCAGGTTTTCTGCTCTTTTCTGAATGTGGGGCCCTTCCTTAAGTATGTCCACTGCTCCTGGTGTCTTC
	1349	56849565	9:C>T	TGCAGTAACCACACAAAGACTTGAATGGAGCTGTACACATAGCATCTCTGCTGTAGGAGCATGAGATCG
	1350	56849661	24:T>G	TGCAGTAGGACCATTAATAAGAGCTGGGCGTTCGCACTGAGCGGTGACTTCATTCTCTGATCGATGGAT
	1351	56849751	19:G>T	TGCAGTCACCTCTCGCTAGGCTAAGCATGGGCAAGCTACGTCTCTCCAGCTGTTGAGGAGCAGCAGGGC
	1352	56849795	62:G>A	TGCAGTCCCAATTATCACTTTATCGGTTCCTCCTGTTTACCATGCATTAAATGGTTCAGAAAGCATTGT
	1353	56849820	53:C>T	TGCAGTCCTTTCTGGAAAACCTGCTCACCACCACTTATAGCAGAGAGGCCTTCCCCACCTCCTGTGTCG
	1354	56849866	23:G>A	TGCAGTCTGCTGGCGTATAAGTGGAACAAGCATGTTTTTACTGATCAAATCAGTTTTTCCACACAATAG
	1355	56849879	22:C>A	TGCAGTCTTATAGTAACTTCTCCCTGAGCATAGAGAACAAACTCTCCATAGGACTGAATGGAGTGTGGC
	1356	56849914	9:G>A	TGCAGTGAAGCATTCCTTATAACTACACTGGATTTAATCTAACTTGAGCTTTGAAGAATCTGTGCATGA
	1357	56849933	49:G>C	TGCAGTGAGAGACTAAACAGTACATTACTCACATGTGATATGCATTGTAGCCCTACTTTTATGGATGAA
	1358	56849943	22:A>G	TGCAGTGAGTGCTCATGGGAGAAATAGTGTCTTCTGGGAGAACGTATTTAAGTCAAGGGAGGAGCATGA
	1359	56850042	68:T>G	TGCAGTGGAAAGTTAGGGTAAGATTGAAGAGGCATTTTTTGTGCTGGTATTTAGATTGGAAACACATGT
	1360	56850044	54:C>T	TGCAGTGGAATGCACACTAGTTCCTCTTGGGTGATGGAGGATGAGGATGGTTTTCGCAAGCCAGTCCAC
	1361	56850110	45:A>G	TGCAGTGGGGCAGCATGGGCAGGCTCCGTTACGTATATATATGTGACTGAACCTCTTCTGGGTTAGGAG
	1362	56850199	62:T>G	TGCAGTGTTTCCTAGGAAGTGGGTGGAGCTGCGCTCTCTCCAGGTGCTGTCCTGAAAGACGATGGGAGA
	1363	56850385	18:G>C	TGCAGTTGGCCGATGTCCGCAGCATCCAGCGAGTCCTCCGGCTCCAGGGGCAGGAAATGCGTGATGGAC
	1364	56850405	9:A>G	TGCAGTTGTAAATAAGAATTTCTTTGAGCCCACTTTGTTCTGGTGTCAGTACTTTCTGAATCACTGACC
	1365	56850419	7:T>C	TGCAGTTTATTTGAGCTGTCCCTAAGGACACAGATATAGGCTGCGACTGTGCCCATAGATCTGCATGAG
	1366	56850419	57:G>C	TGCAGTTTATTTGAGCTGTCCCTAAGGACACAGATATAGGCTGCGACTGTGCCCATAGATCTGCATGAG
	1367	56851182	37:C>A	TGCAGAAGTGTTCTCTGAACAAACAGTGCTCCTTAAGCGTTCAAGGGGCTATGCATGAGATCGGAAGAG
	1368	56851232	10:C>T	TGCAGACAGGCCTTTTATGATGCACTTTCCTATGTTCACATGGTGCATGAGATCGGAAGAGCGGTTCAG
	1369	56851253	25:T>G	TGCAGACATTTTACTCAGATGGTGATGTAGCAGTCTAGCATGAGATCGGAAGAGCGGTTCAGCAGGAAT
	1370	56851285	49:A>T	TGCAGACTAAAGATTCTTGTGTGGCCAGTAAAAATGCTGTAAAAATGGTATGCATGAGATCGGAAGAGC
	1371	56851423	18:A>G	TGCAGAGGAAGTTGCAGAACCCACATATTGCCCTCACCAATATGTAATCAGCATGAGATCGGAAGAGCG
	1372	56851494	16:C>A	TGCAGAGTGGCGCGTGCTTTCATTAATAATGCAGGAGGTGTCTTCAGCATGAGATCGGAAGAGCGGTTC
	1373	56851525	34:T>C	TGCAGATAGTGTGCATTTGGAGTATGCGTCAGTGTGCATGAGATCGGAAGAGCGGTTCAGCAGGAATGC
	1374	56851569	30:C>T	TGCAGATGTACATGTAGTCTGAATGGACTGCGAGCATGAGATCGGAAGAGCGGTTCAGCAGGAATGCCG
	1375	56851587	13:T>G	TGCAGATTCCAGCTTGATCATGATCTGGGAAAAGCATGGCATGAGATCGGAAGAGCGGTTCAGCAGGAA
	1376	56851777	25:A>T	TGCAGCATCATCCCAGGTCCTCAATATAGTGTGAAGAAACAGCCAGCATGAGATCGGAAGAGCGGTTCA
	1377	56851857	55:A>T	TGCAGCCAGGGGAGAGGCCCTCCACTGTCAAAACCAGAGTGGACAGGAGAATAATAGCATGAGATCGGA
	1378	56852077	24:T>C	TGCAGCTCCTGATACCAGTAAAGCTCAAAGCATGAGATCGGAAGAGCGGTTCAGCAGGAATGCCGAGAC
	1379	56852209	45:A>G	TGCAGGAAAAGTCCAAGAGCTCAAGTGCTCCCTGAACATAAATACAGGCACCCAGCATGAGATCGGAAG
	1380	56852345	5:G>A	TGCAGGCAAACCTGGTAGTGGTGGAACGCATGAGATCGGAAGAGCGGTTCAGCAGGAATGCCGAGACCG
	1381	56852436	6:C>T	TGCAGGCTAGGAAAAGAAAGCATGAGATCGGAAGAGCGGTTCAGCAGGAATGCCGAGACCGATCTCGTA
	1382	56852566	12:G>A	TGCAGGTAAAATGAATATCTCCCAAACCTGTACGGTATTCACTTTGCATGAGATCGGAAGAGCGGTTCA
	1383	56852586	14:G>T	TGCAGGTACCATCTGCAAGGTGCAGTCACTTGAAGGAGTAGAGGCATGAGATCGGAAGAGCGGTTCAGC
	1384	56852586	37:G>C	TGCAGGTACCATCTGCAAGGTGCAGTCACTTGAAGGAGTAGAGGCATGAGATCGGAAGAGCGGTTCAGC
	1385	56852595	23:A>G	TGCAGGTATTTGGAACCTATAAGACATCTACAGCATGTCTGCATGAGATCGGAAGAGCGGTTCAGCAGG
	1386	56852596	29:A>T	TGCAGGTCAACTGGCTTAGAAGGACCAATAATGCATGAGATCGGAAGAGCGGTTCAGCAGGAATGCCGA
	1387	56852614	40:T>A	TGCAGGTCGCATGGTGCAAAAGCAGAATGCCACTGCATTTTTAAAATGCAGCATGAGATCGGAAGAGCG
	1388	56852616	7:C>T	TGCAGGTCGGTCATTTTTGGCATTTGCTGAATGAGGGAGAAGAGCATGAGATCGGAAGAGCGGTTCAGC
	1389	56852666	25:T>A	TGCAGGTTTAAATTGTGTAGAAAAGTTGGTGTCCTCTACTGAGCATGAGATCGGAAGAGCGGTTCAGCA
	1390	56852678	9:T>C	TGCAGGTTTTTGGACTGCAAGTTTACATGCAAGTGCGCTTGATGCATGAGATCGGAAGAGCGGTTCAGC
	1391	56852748	12:A>T	TGCAGTAGCCATACACACAGAATCACTGTTTGCTTGCATGAGATCGGAAGAGCGGTTCAGCAGGAATGC
	1392	56852787	8:C>G	TGCAGTCACAGAGAGTGCCCAATGCATGAGATCGGAAGAGCGGTTCAGCAGGAATGCCGAGACCGATCT
	1393	56852804	22:G>A	TGCAGTCCAAAGGTGTCCCTGCGCAGTGAAAGTCCATGTCATCTGCATGAGATCGGAAGAGCGGTTCAG
	1394	56852812	38:T>C	TGCAGTCCCCTTTCCACTAAGAAGACAACTATGATATATGGAGATGCCAGCATGAGATCGGAAGAGCGG
	1395	56852815	47:G>A	TGCAGTCCGGTCCACCCCAGGTCGGGTGTAGGATCAGGTAGGAAATTGTGCATGAGATCGGAAGAGCGG
	1396	56852826	35:C>T	TGCAGTCTACACTACCTTGCCCTGTATCAGCCATCCATACACCTATCTTCGATGCATGAGATCGGAAGA
	1397	56852848	24:T>C	TGCAGTCTGTTGTGTCTAGAGCAGTTAGAGTCAGCATGAGATCGGAAGAGCGGTTCAGCAGGAATGCCG
	1398	56852931	8:C>T	TGCAGTGGCGTGTGGGTACTAAGCGCTAAAAAAGTACTGTGCATGAGATCGGAAGAGCGGTTCAGCAGG
	1399	56852966	51:A>G	TGCAGTGTGTTCCACATAAGTCAGGCAATGGACAGTGTCTAACAGATTCCTAACAAGCATGAGATCGGA
	1400	56852990	28:C>G	TGCAGTTAGTGGTGACAGCACGTTAAGCCATGCCCACTGCATGAGATCGGAAGAGCGGTTCAGCAGGAA
	1401	56853016	16:G>A	TGCAGTTCCTGCACCCGCACTGCAATTTTGCATGAGATCGGAAGAGCGGTTCAGCAGGAATGCCGAGAC
	1402	56853031	24:T>C	TGCAGTTGACCTCTCTTTGACCTATGTCAAGCAAGTTGTGCATGAGATCGGAAGAGCGGTTCAGCAGGA
	1403	56853032	40:G>T	TGCAGTTGAGGTTTGAAATGTAAGGAGGAAAATCTGATTGGTTGCATGAGATCGGAAGAGCGGTTCAGC
	1404	56853035	54:C>T	TGCAGTTGCCATGGTGCTGCACATGTGATCAGTTATGAAACCAGCCATTCATGGCGGCATGAGATCGGA
	1405	56853072	35:G>A	TGCAGTTTCTTTGTAGACTTGGCATTCACAAGTACGTCCCAGCATGAGATCGGAAGAGCGGTTCAGCAG
	1406	56853078	14:C>T	TGCAGTTTGCGTAACACTGTGCATGAGATCGGAAGAGCGGTTCAGCAGGAATGCCGAGACCGATCTCGT
	1407	56853598	26:C>T	TGCAGGCTGAGAATGTGTACACCAGCCGATGTCACATCTACTGAGCATGAGATCGGAAGAGCGGTTCAG
	1408	56853620	27:T>A	TGCAGTCTCTGACGATCACCTGTGTTATGCATGAGATCGGAAGAGCGGTTCAGCAGGAATGCCGAGACC
	1409	56853793	22:C>A	TGCAGGTTGAGATTGTGTAGACCTGCTGGTGTCCTGTACAGAGCATGAGATCGGAAGAGCGGTTCAGCA
	1410	56853793	26:T>C	TGCAGGTTGAGATTGTGTAGACCTGCTGGTGTCCTGTACAGAGCATGAGATCGGAAGAGCGGTTCAGCA
	1411	56853800	26:C>T	TGCAGTCCTTATCCACCTGAGGCCACCAGAAGGAGCATGAGATCGGAAGAGCGGTTCAGCAGGAATGCC
	1412	56853851	13:G>C	TGCAGAAAAAATGGACTTAACTGCATGTGGTGTGAACTGGCACTTAAGGTAAGCCTCAACCCTACAACC
	1413	56854117	41:G>T	TGCAGACGCTCAGTGGAATTGTTTCCCTGTGTAATTGCCATGCTTTCCTGGGAAATCCCAGCATGAGAT
	1414	56854504	43:C>T	TGCAGATGGTTGGCCCGCACAGGCAAAGCTCCTTACCCATACACCGTTGCCTGCTTCTGGATTAAGGGC
	1415	56854552	6:T>C	TGCAGATTTCTTTCCCCACTGCAACCTAGTAATCCAAGTGTAAAACACCATAAGCCAGTTCTGTATTAC
	1416	56854552	49:A>G	TGCAGATTTCTTTCCCCACTGCAACCTAGTAATCCAAGTGTAAAACACCATAAGCCAGTTCTGTATTAC
	1417	56855214	41:T>C	TGCAGCTGTCTTCAGTTGTTCTTTGTGGGTCTTTCTGACTTTAGTTTTTGCCTTCAGCAAGTGAAATGC
	1418	56855286	26:G>A	TGCAGCTTTGAATCTCGCTTAAAGCGGTTGTCTACCCATCGATTTGATAGTGTCAAAGAAGAGTTAATA
	1419	56855469	51:G>A	TGCAGGCATCATTCAGATATCCAGGCTCAAAGTTATGATGTCATATGATGTGACCCTGGAGAAAGGGGT
	1420	56855516	63:T>C	TGCAGGCGACACTGGAGTGGCAGCACTTACTTGATCCACAGACATCCGAGCCTTCAAAGTCACTGGATG
	1421	56855814	26:G>C	TGCAGGTGTAAACAAGCCCTTAGAAAGCATTGAAGCCACTGGATCAGCATGACAGGCAGCAGCCTATGT
	1422	56855822	25:G>A	TGCAGGTGTTCATGAAAGCTGGTGTGTTATCAAGGCTGGAGAAGCAGCGAGAGAAGATGATCTCCCAAA
	1423	56855911	44:G>A	TGCAGTAATGGAAAGCGATTCCTCGCAATGCCTTAGTCATTGATGGTGCTATTTATTGCATGAGATCGG
	1424	56856163	22:G>A	TGCAGTCCTTTGCAGATCTTAGGGCTATATACGCTTTACCTCAGTGGATGTATTTCCGCTACCTTCATC
	1425	56856186	62:A>G	TGCAGTCTCTGACCATCTCCTGTAGTAGGTCTGTAGTCTCTAACCATCTCCTGTAGTGTGTCATCAGTG
	1426	56856376	27:G>C	TGCAGTGGAGACGCCTTCATCCCATAAGAACTCTTAGGCCTCATGCACACCGGACGTTTTAAAAAACAT
	1427	56856406	16:A>G	TGCAGTGGCTGCACATACAGCAGAGGGCCATGAACGAGTCCCAGTGTGAGTATGGTAGCTCTACTTTTT
	1428	56856609	38:T>C	TGCAGTTCTGAATACGAAGCGCTGTTGTTTCAATCCGCTTTTAGCATTATTTTCTTTGCGGCGCTTCGT
	1429	56856721	60:T>A	TGCAGTTTCCCTGCAACAGTCCATGCTATAATACCCAACAAGGACTTTGCATACTGACTTTTCTCAGCG
	1430	56856776	19:G>A	TGCAGTTTTGCTTTTCTCCGGTGTCATTTCATATCGATTGACAATTACAAGGCAGAAGAGAAGATAAAC
	1431	56856981	15:A>G	TGCAGTCAAACCAGCACATTTTGTTCCTGACACCCAGCTGATGCAGGCCAGCTTACCTTTAGAGAAATT
	1432	56857316	9:C>T	TGCAGAAGACGTCTCCAGGGATGTGGGCGAGGTCTTCAGTTACTAGAGCATGAGATCGGAAGAGCGGTT
	1433	56857610	29:C>T	TGCAGATCAGGGAAGATGTGGAAGGCCTCCGGGAGCTTTGATCCAGGTAGCTGCATGAGATCGGAAGAG
	1434	56857616	17:G>C	TGCAGATCCTTGGACTTGGAGGTGCTCCTGGGGTTTGCAGCATGAGATCGGAAGAGCGGTTCAGCAGGA
	1435	56857808	20:C>T	TGCAGCATTCTCTTTAACAGCTTCATGCCACAATTGCATGAGATCGGAAGAGCGGTTCAGCAGGAATGC
	1436	56858259	28:G>A	TGCAGGCCAAATTTGCACAGGCATGGCAGCCCATTCATTTCAATGAGCATGAGATCGGAAGAGCGGTTC
	1437	56858259	29:C>T	TGCAGGCCAAATTTGCACAGGCATGGCAGCCCATTCATTTCAATGAGCATGAGATCGGAAGAGCGGTTC
	1438	56858555	36:C>T	TGCAGTCACTGTTATGCTGAGAGTTTTTGTCCTTGACGGGCTCTACATGCATGAGATCGGAAGAGCGGT
	1439	56858577	34:G>T	TGCAGTCCATACCTCTTTTAATACAAGAAAGGTGGAACCCTCAGCTTGGCATTGCATGAGATCGGAAGA
	1440	56858636	12:C>A	TGCAGTGCCGCACGATCCGGTTACAGCACATTTTTAAAAGTAGAGCATGAGATCGGAAGAGCGGTTCAG
	1441	56858701	24:T>C	TGCAGTTAAAGGAAATGTTACAGTTCCCTCTGGAAATTCACACGGATGAAGCATGAGATCGGAAGAGCG
	1442	56858702	17:T>A	TGCAGTTAAATCTGAATTAATAAAGTACAGCGACACACAGCATGAGATCGGAAGAGCGGTTCAGCAGGA
	1443	56858702	31:G>A	TGCAGTTAAATCTGAATTAATAAAGTACAGCGACACACAGCATGAGATCGGAAGAGCGGTTCAGCAGGA
	1444	56858712	22:T>C	TGCAGTTATGAGGATGGGGATATCCCTGTGGTGCATGAGATCGGAAGAGCGGTTCAGCAGGAATGCCGA
	1445	56858715	11:T>C	TGCAGTTCAAATCTTCAGACAAAGAGGGTAATTGGCATGAGATCGGAAGAGCGGTTCAGCAGGAATGCC
	1446	56858721	39:A>T	TGCAGTTCCATCGTAATTTCACAGCCCTTCCACTGCTGAAAACTGGCATGAGATCGGAAGAGCGGTTCA
	1447	56858969	13:A>C	TGCAGCGAGGGAAAAAACGCATGAGATCGGAAGAGCGGTTCAGCAGGAATGCCGAGACCGATCTCGTAT
	1448	56859002	25:C>A	TGCAGAGAGACCACTGCTTCCATACCGAGAGTAAGGGTCCCACTTTGCAGCATGAGATCGGAAGAGCGG
	1449	56859080	27:C>T	TGCAGTACATGCAGAGTGCCGCTTTAACCTCAACTGGTCCAGCATGAGATCGGAAGAGCGGTTCAGCAG
	1450	56859173	12:C>T	TGCAGATGCATTCCGCATACGTTTCTGCATGAGATCGGAAGAGCGGTTCAGCAGGAATGCCGAGACCGA
	1451	56859218	6:T>G	TGCAGGTTAGGATTGGCTGAGCATGAGATCGGAAGAGCGGTTCAGCAGGAATGCCGAGACCGATCTCGT
	1452	56859421	55:A>C	TGCAGAATGTGTTCCATAGGAAATCATGTTAAATGGACTGCAATGCAAATCTGCAAAATGTAAAAAGCA
	1453	56859435	65:T>A	TGCAGACAAGTCTTTTGAGTATTTCAAGAAGCCTGTGTCCAGCAATCTTGCAAATCCCCCATTCATAGC
	1454	56859802	63:G>C	TGCAGATGTGTAAGTAAACCTTGGGAAAGAGCCTAGGATGCAATTAGAAGACGATGGCATTTAGAAGCA
	1455	56859831	31:G>A	TGCAGATTGATAATGCTGGGGGTTTAAAAATGAAGCTGTTCATCCCTACTAGTGATGTTGCGGCCTTGA
	1456	56859831	60:C>T	TGCAGATTGATAATGCTGGGGGTTTAAAAATGAAGCTGTTCATCCCTACTAGTGATGTTGCGGCCTTGA
	1457	56860170	12:G>C	TGCAGCCTCCTTGGACACGCATGTCAGACAACCCAGAATGCCTTGGGTACTCTACAATGCATGAGATCG
	1458	56860274	64:G>A	TGCAGCTATCCAACAGAATGAGATAAACTGACTTCAATTCAGTATTCTGCTCTGTAGCACACCGGCGTG
	1459	56861054	61:A>G	TGCAGTAGCTACACATGCAGCAGAGGGCCACCAGTGAGTACCTATGTGAGTATGGCACAGCAACACTTT
	1460	56861358	47:T>C	TGCAGTGCATTAAATGTTCATGCATTAACAGGCATGGCATTAAGGCCTCACAAACCAAAAATGGTGCAT
	1461	56861560	15:A>C	TGCAGTGTTATCTTTATTTCCCTGCCTATTAACTAGACAGTTAACTGAGGCAGGCCAATGTGCTCATCC
	1462	56861687	58:C>T	TGCAGTTGCCATGGTGCTATAGGTGTACAAAATAAGCCACTGTGACAATTATCATTCACAGCATGAGAT
	1463	56862263	27:C>A	TGCAGAAATATTGGGGTGCCTTGGAGCCGCTTTGCAGCTTATGCATGAGATCGGAAGAGCGGTTCAGCA
	1464	56863081	15:G>T	TGCAGGTAAGTCGCAGGGTGCAAACGCATGATGCGATTTCAAGGCCACTGCATCCTGCATGAGATCGGA
	1465	56863115	18:C>T	TGCAGGTCTGTGACATGGCGGACATAGAGAGCATGAGATCGGAAGAGCGGTTCAGCAGGAATGCCGAGA
	1466	56863177	10:C>A	TGCAGTATCTCTTCTTGGTGAGTATTGAGTGATACACAGCAATGGTTGAAGAGCATGAGATCGGAAGAG
	1467	56863197	16:G>T	TGCAGTCTCCTTCCACGTACTGATCGGTGTGTACAGCATGAGATCGGAAGAGCGGTTCAGCAGGAATGC
	1468	56863319	17:G>T	TGCAGTTTATTGTCAAAGACTTAGGCTCAGTTCACATTGGTGCACTGTCTGACATTGCATGAGATCGGA
	1469	56865255	62:G>A	TGCAGTCCACAAACAGTCACCATCAAATTTAACGTGTTACTAAACCCACAACAGTAAAATCAGTCTGTA
	1470	56865382	65:C>T	TGCAGTGATAAGATATCCGCTGCATAGGAAGTGCACAATTTTAAACTATTCAACTCATAGCTTTGCCGA
	1471	56866161	23:G>A	TGCAGAGAGACCACTGCTTCCCCGTTCCTCTGTAGCATGAGATCGGAAGAGCGGTTCAGCAGGAATGCC
	1472	56866338	17:T>C	TGCAGCACTCTCCATGCTTGGTTCGCAGGCATGAGATCGGAAGAGCGGTTCAGCAGGAATGCCGAGACC
	1473	56866338	24:G>A	TGCAGCACTCTCCATGCTTGGTTCGCAGGCATGAGATCGGAAGAGCGGTTCAGCAGGAATGCCGAGACC
	1474	56866366	10:G>A	TGCAGCAGCTGGCAGGTGGGCAGCATGAGATCGGAAGAGCGGTTCAGCAGGAATGCCGAGACCGATCTC
	1475	56866409	11:T>C	TGCAGCCAAGGTTCCATCTTCACTAAAATTCAGCATGAGATCGGAAGAGCGGTTCAGCAGGAATGCCGA
	1476	56866737	47:G>A	TGCAGGTTAAATAGGTGCAACGTTAGAATGCAAAACAGTTTAACGGTGCCAAAAAGCATGAGATCGGAA
	1477	56866794	10:G>C	TGCAGTCCAGGATACATTACAGGCAGCACACATGAGGAGTGCGCATGAGATCGGAAGAGCGGTTCAGCA
	1478	56866794	37:A>G	TGCAGTCCAGGATACATTACAGGCAGCACACATGAGGAGTGCGCATGAGATCGGAAGAGCGGTTCAGCA
	1479	56866794	41:C>T	TGCAGTCCAGGATACATTACAGGCAGCACACATGAGGAGTGCGCATGAGATCGGAAGAGCGGTTCAGCA
	1480	56867043	43:A>G	TGCAGGCAATCAGACAATGTCCAGCATCCCCACATTAGAAGTTATTCGGCATGAGATCGGAAGAGCGGT
	1481	56868058	53:A>G	TGCAGGCAGAAGGGATACTTTCTGTCCCTCTGATGGAAGAGGACGGGAAATTAAATGTCACTGGTAAAC
	1482	56868404	15:C>T	TGCAGTATATTTGCACGGGCGGTCAATAAGTGGTACTGATTGTGCACTGACTATAAATTTTATTACAGA
	1483	56868404	19:C>T	TGCAGTATATTTGCACGGGCGGTCAATAAGTGGTACTGATTGTGCACTGACTATAAATTTTATTACAGA
	1484	56868767	31:T>G	TGCAGTTGCCATGGAGCTGCACATGCCATCATTTATAGCGCCAGCCATCTGATGGATGAGTTTGGTTGA
	1485	56869117	30:G>T	TGCAGAGGATAACCCCTTAGATTCCACAGTGAGTATAACAAGCATGAGATCGGAAGAGCGGTTCAGCAG
	1486	56869128	10:C>T	TGCAGAGGTTCAAACATGTTTTGCAGCTGATAACGCTTAGCATGAGATCGGAAGAGCGGTTCAGCAGGA
	1487	56869128	37:T>G	TGCAGAGGTTCAAACATGTTTTGCAGCTGATAACGCTTAGCATGAGATCGGAAGAGCGGTTCAGCAGGA
	1488	56869161	21:G>A	TGCAGATCAATGTATAATTTCGGCATCTGCTGAGGTGTATGAACTCCCATGCATGAGATCGGAAGAGCG
	1489	56869161	26:C>T	TGCAGATCAATGTATAATTTCGGCATCTGCTGAGGTGTATGAACTCCCATGCATGAGATCGGAAGAGCG
	1490	56869576	33:A>G	TGCAGTTACTGTGTAAGCCCGGCACTATCCATTACACCGTGCTGCACGGCATGAGATCGGAAGAGCGGT
	1491	56869585	48:T>C	TGCAGTTGCAGGGCTTTCTTTCCTCAAATTGCAGTAACCCCTTCTTTTTATGCATGAGATCGGAAGAGC
	1492	56869769	6:C>T	TGCAGGCGGTGTGTTGTGCATGAGATCGGAAGAGCGGTTCAGCAGGAATGCCGAGACCGATCTCGTATG
	1493	56869806	9:A>G	TGCAGGGAGAGGCCGAGTGTGGATGATATCACTCCGCCTTCCACTGTCTCAGGCATGAGATCGGAAGAG
	1494	56869806	35:G>A	TGCAGGGAGAGGCCGAGTGTGGATGATATCACTCCGCCTTCCACTGTCTCAGGCATGAGATCGGAAGAG
	1495	56870371	27:G>A	TGCAGCTGGGTCACGGCTTATCTGTGTGTCTGGGGAACCTGCTGCCTCTGCTCAGGCTCTGAGGGACTA
	1496	56870849	24:T>C	TGCAGTGGACAGTGAGGATCCAGCTGTCCATTGAGACAAACATCCCTGGAACTCCAGGCATGAGATCGG
	1497	56871192	13:T>G	TGCAGAAGTGCTATAGGGTAATACAGTGAAGGAGTTTAAGCATGAGATCGGAAGAGCGGTTCAGCAGGA
	1498	56871278	8:C>T	TGCAGATGCGCTGATGTGTCAGTGCATGAGATCGGAAGAGCGGTTCAGCAGGAATGCCGAGACCGATCT
	1499	56871562	30:C>A	TGCAGTCTCCTTTCTGTATAGGGTACTGCTCAGCATGAGATCGGAAGAGCGGTTCAGCAGGAATGCCGA
	1500	56871609	28:T>C	TGCAGTTTACTCTGAATAACAAGACACATGGTTTCTCAAGCATGAGATCGGAAGAGCGGTTCAGCAGGA
	1501	56871685	25:C>T	TGCAGTTCTGATAGTCAGGCCTGTTCCTGCATGAGATCGGAAGAGCGGTTCAGCAGGAATGCCGAGACC
	1502	56871738	24:G>A	TGCAGTCATACTGCTGGAGAGTGCGGCGGGCACGAGAGCATGAGATCGGAAGAGCGGTTCAGCAGGAAT
	1503	56872470	5:T>C	TGCAGTCAGTCAAAAGTCCGCTCGTTAGAGATGGAACATCCGGGGCATCGGGGGACCAGCATGAGATCG
	1504	56872481	43:A>G	TGCAGTCCATCTGTTAGCCTCTGAAAGAGCAGAACAAAGCTAAACATGGGGAAACCCGAGTGCAATCAT
	1505	56872939	19:C>A	TGCAGCCTACCAGTGCCCACCAATTGCAGCATGAGATCGGAAGAGCGGTTCAGCAGGAATGCCGAGACC
	1506	56873080	32:G>A	TGCAGTCTCTGGCTGTCTCCTGTACCAGGCCAGCTGTCTCCTGTACCATGCATGAGATCGGAAGAGCGG
	1507	56873098	47:A>G	TGCAGTGGAGGAGCATCCCTTGATAGGGAATACCTTAAAAGTATTTCAGAGGGCATGAGATCGGAAGAG
	1508	56874182	21:A>T	TGCAGGTCTCAATTCCGTTGGATCCTAAACAATGTGTTCTGGGCATGAGATCGGAAGAGCGGTTCAGCA
	1509	56874182	40:G>A	TGCAGGTCTCAATTCCGTTGGATCCTAAACAATGTGTTCTGGGCATGAGATCGGAAGAGCGGTTCAGCA
	1510	56874230	35:T>A	TGCAGTGTTTGGTGTGTCAACCGTTCGGCTGGGAATCCCAGGGAGGCATGAGATCGGAAGAGCGGTTCA
	1511	56874317	10:A>G	TGCAGGAAAAAAGACTACCGGCCTCCAACCTCCCCTCATAGCCAATCCAATGCATGAGATCGGAAGAGC
	1512	56874317	16:A>T	TGCAGGAAAAAAGACTACCGGCCTCCAACCTCCCCTCATAGCCAATCCAATGCATGAGATCGGAAGAGC
	1513	56874670	10:C>A	TGCAGTGTGACCCGAGCCTAATTGTGGATTCTTCTTCTCTGAGCTTTAGAAAGGTAGGTTGAGAAAGGA
	1514	56874746	23:G>A	TGCAGTGGTATTGCATAGAGAGCGGTCCTGAACCTCCTCTTCTGGAATCCCCATGCCAGCAATCTCGTC
	1515	56874746	31:A>G	TGCAGTGGTATTGCATAGAGAGCGGTCCTGAACCTCCTCTTCTGGAATCCCCATGCCAGCAATCTCGTC
	1516	56874769	21:C>A	TGCAGTTCACAGAAACCGGAACTACAGAGGAGGCATCGGGTATCAATGCGCACTGACAGTATTGATTGT
	1517	56875055	7:G>A	TGCAGTCGGACCCGCAGGGTCGCTTTTTATTTTTGCATGAGATCGGAAGAGCGGTTCAGCAGGAATGCC
	1518	56875055	19:T>C	TGCAGTCGGACCCGCAGGGTCGCTTTTTATTTTTGCATGAGATCGGAAGAGCGGTTCAGCAGGAATGCC
	1519	56875126	11:A>G	TGCAGTTTCCCAGTGGGAATATCCCAGTACAGGCTATCCTTGACTCAGGTGCATGAGATCGGAAGAGCG
	1520	56875158	30:G>A	TGCAGTATCAGTCTCCCAGGTTTACACTCTGTATTCAGGTGCTGGCAGAGACAGAGCACATCTCGCTCC
	1521	56875395	14:A>T	TGCAGTATGCCAAAAGTCATGTGGACAAACCACAGAAGTTTTGGGATAGTGTTCTGTGGACTGATGAAA
	1522	56875566	5:A>T	TGCAGAATGTGAATGGACATTAGCATGAGATCGGAAGAGCGGTTCAGCAGGAATGCCGAGACCGATCTC
	1523	56875566	18:A>T	TGCAGAATGTGAATGGACATTAGCATGAGATCGGAAGAGCGGTTCAGCAGGAATGCCGAGACCGATCTC
	1524	56875662	37:G>C	TGCAGGCAAATCTGAGACAGACTCTGAAGAAGAATGTGAATAAGCATGAGATCGGAAGAGCGGTTCAGC
	1525	56875776	5:A>T	TGCAGAGGAACTACAAGTCCCAGCATGAGATCGGAAGAGCGGTTCAGCAGGAATGCCGAGACCGATCTC
	1526	56876055	19:A>T	TGCAGTTTTACAGGTGTTTAGGCCCTCTGCCTCCAAATGACCACACAATGGTGCATAAGAACACAAAGC
	1527	56876125	5:A>G	TGCAGAGGGAGCCTCCAATAGATTGCATGAGATCGGAAGAGCGGTTCAGCAGGAATGCCGAGACCGATC
	1528	56876314	8:A>T	TGCAGAAAAGAGGGTATAAACATGTCCTATTCAAAAATGTTCAGTTTCCCTCCCATATCCAAAAATGGT
	1529	56876327	42:C>T	TGCAGAATACTGGTACTGTTAGTGAATGAACATGTCTCTGTTCCCCCATATGTGCTCAGCTGTATGTAC
	1530	56876502	38:C>T	TGCAGTTACTCTTATGAAGACCGTCCGCCTTTCCCTGGCTCTTGATTTTTGAGAGCATGAGCATGAGAT
	1531	56876571	21:T>C	TGCAGAGTTTCCCTAAGTGAATACAGCATGAGATCGGAAGAGCGGTTCAGCAGGAATGCCGAGACCGAT
	1532	56876644	16:C>T	TGCAGGTCCTAGTAGACGATTGGCTCAGCAATGGCATGAGATCGGAAGAGCGGTTCAGCAGGAATGCCG
	1533	56876655	12:T>C	TGCAGTCACATGTTCTCTGAGACTCTGACTAGTGTAGGGAGAGCATGAGATCGGAAGAGCGGTTCAGCA
	1534	56876723	13:T>C	TGCAGACCCTGTGTTTACATGTAAATAACTGGCATTGATATGTAAATAGAGGTGGCATGAGATCGGAAG
	1535	56876848	7:C>T	TGCAGTACATTTCTCAATTTACAAATCTTTACACAAAAATAAGGATTTTTATTTTGAGGCATGAGATCG
	1536	56876958	6:T>C	TGCAGATCAGTTCTTAAGCCACAGCATGAGATCGGAAGAGCGGTTCAGCAGGAATGCCGAGACCGATCT
	1537	56877021	43:T>G	TGCAGCTTGGTCCCCTATTTCTGTCACCTTCCTGCTCCAAGTGTGCATGAGATCGGAAGAGCGGTTCAG
	1538	56877082	8:A>G	TGCAGCAGACAGACTTGTAGTTTGAATGGACCGTGAGCATGAGATCGGAAGAGCGGTTCAGCAGGAATG
	1539	56877185	19:A>T	TGCAGAGGCTTCCATCTTCACCCGGTCATCCTTCTGGGTTTGCGGGCGCTTGAATGATGGAGCTGCGAT
	1540	56877189	9:C>T	TGCAGATAGCTATCAGGCTAACTCTGAGGAGGAGCACAACACTTCTCTAGCTAACCTCCCCACTACTGA
	1541	56877349	15:G>A	TGCAGCCTTAATATAGTGCTTCACCTGGCATGAGATCGGAAGAGCGGTTCAGCAGGAATGCCGAGACCG
	1542	56877410	19:C>T	TGCAGTTTACTACTGCTTTCAAGCTGAATTCCAGAAACTCAGGCATGAGATCGGAAGAGCGGTTCAGCA
	1543	56877580	53:C>T	TGCAGTGCCGCTTTTGCTTTATAAAGCAAATGTTCCGAAATTTGGTTCCGAAGCAGTACAATTTCCGCG
	1544	56877597	58:T>C	TGCAGTTGATCCCTTTCCTGATACATGCCAACACTTTGTTAGCTTTGTTTGCAGCAGCTTGACATTGCA
	1545	56877670	8:A>G	TGCAGTAAACCATTATTCTTTGGCATGAGATCGGAAGAGCGGTTCAGCAGGAATGCCGAGACCGATCTC
	1546	56877919	25:A>C	TGCAGCATTCCTTTTAGCGCAGTGGAACTTGTGCCTGGCAGCATAATGCTTGCTGGCTCAGATCGGAAG
	1547	56877965	10:A>G	TGCAGTGGAGAAAATAGACTGCACCTGCCTACATGCATGAGATCGGAAGAGCGGTTCAGCAGGAATGCC
	1548	56877965	23:C>T	TGCAGTGGAGAAAATAGACTGCACCTGCCTACATGCATGAGATCGGAAGAGCGGTTCAGCAGGAATGCC
	1549	56877966	10:C>T	TGCAGTTCTTCAGGCCTACTGCACTCAGGGCATGAGATCGGAAGAGCGGTTCAGCAGGAATGCCGAGAC
	1550	56877966	16:T>C	TGCAGTTCTTCAGGCCTACTGCACTCAGGGCATGAGATCGGAAGAGCGGTTCAGCAGGAATGCCGAGAC
	1551	56877975	9:G>T	TGCAGTGCTGTCATTTACATTCTGCCTACAAGTGCATGAGATCGGAAGAGCGGTTCAGCAGGAATGCCG
	1552	56878204	6:A>T	TGCAGCAACATGCAGGCAGCCTTTACAAGTGCATGAGATCGGAAGAGCGGTTCAGCAGGAATGCCGAGA
	1553	56878349	6:G>A	TGCAGCGCTGATCAAGCGTATTTTATCCAACTGGGCAGTTGAACAGAAGCTGGTCAGTAGATTGACTTC
	1554	56878492	7:C>A	TGCAGTCCTTTCAAAACCTACACTGAGAGGAATGAAGGTGTAGCAATGCATGAGATCGGAAGAGCGGTT
	1555	56878647	15:T>G	TGCAGACCTAAACCCTATTGAGCATCTGTGTGGCATGAGATCGGAAGAGCGGTTCAGCAGGAATGCCGA
	1556	56878647	29:T>G	TGCAGACCTAAACCCTATTGAGCATCTGTTTGGCATGAGATCGGAAGAGCGGTTCAGCAGGAATGCCGA
	1557	56878826	19:T>A	TGCAGTACCAGCTCTCCTGTACATGGAAGAGACAGCAGGGTATACACTGGCTGTACCTCCCAGCATGAG
	1558	56878827	27:C>A	TGCAGTACCAGCTCCCCTGACCATGGACGAGACATCAGGGTATACACTGGCTGTACCTCCCAGCATGAG
	1559	56879181	7:T>C	TGCAGCTTCATGGTCAATGATGGTGTATAACGAGCTTACATCAGCGGTGGCCAAAATAATGGGTGAATT
	1560	56879184	5:C>G	TGCAGCTGCAACAGGAGGAAACTGCTTTATCCAGGAGCCCATCAGTGTCTGCTCACACCTCCCCATTCC
	1561	56879184	6:T>G	TGCAGCTGCAACAGGAGGAAACTGCTTTATCCAGGAGCCCATCAGTGTCTGCTCACACCTCCCCATTCC
	1562	56879229	10:C>T	TGCAGGTTGACATCAGTCCTTTGCATGAGATCGGAAGAGCGGTTCAGCAGGAATGCCGAGACCGATCTC
	1563	56879283	16:C>T	TGCAGGGTAAATCAAGCGTCTCTGCCTATTCCGGTGCTTCAGCATGAGATCGGAAGAGCGGTTCAGCAG
	1564	56879299	10:G>C	TGCAGGTCACGCTGCTGTAACCCCTTGTGTGAAGGGTTAAAACTTGCAGGCATGAGATCGGAAGAGCGG
	1565	56879635	8:A>G	TGCAGCACAGCTGCACACATGCAGGGGGCAGAGCAAGCATGAGATCGGAAGAGCGGTTCAGCAGGAATG
	1566	56879899	28:G>A	TGCAGACTCTGATGTAAGGGAGAACTCTGGGTACTCTAACATAAGGCATGAGATCGGAAGAGCGGTTCA
	1567	56879899	31:T>G	TGCAGACTCTGATGTAAGGGAGAACTCTGGGTACTCTAACATAAGGCATGAGATCGGAAGAGCGGTTCA
	1568	56880162	35:T>G	TGCAGCAAGTCACTCAGTCCCCTGTGTGTCCACAATTCACAATATATGATCAGCGCCTAATCCTTTTTC
	1569	56880370	23:C>T	TGCAGGCACCATTCAGATATCACCACTCAAAGGCAGGACGTCAATAGATGTCCACCTAAAGAGAAGTGG
	1570	56880370	24:A>T	TGCAGGCACCATTCAGATATCACCACTCAAAGGCAGGACGTCAATAGATGTCCACCTAAAGAGAAGTGG
	1571	56880468	15:T>C	TGCAGGTTGAGACCCTGATGAGGATGACGAGCATGAGATCGGAAGAGCGGTTCAGCAGGAATGCCGAGA
	1572	56880480	19:T>C	TGCAGGCCTTGTTGACTGTTCTCAAGCATGAGATCGGAAGAGCGGTTCAGCAGGAATGCCGAGACCGAT
	1573	56880510	37:T>C	TGCAGTCCATCCTACCAGATAAACCCACTTTTGTATATAAGAGGGCTCCTACACTCAGAGATATATTAG
	1574	100019480	50:G>A	TGCAGCTGATCACATGGTACAGTAGTATTCATGCGGTCCTGTTGATTTGGGTTTTTAAAGTAATGCATG
	1575	100021261	39:C>T	TGCAGGATCCACTGACCTTGCTGCTTGGTATGCTACTGACATATTGACTTCCTCTTATCTCAGGAACAA
	1576	100024547	19:G>A	TGCAGTACAGTATTTCACAGCTATATAACATTTGTTGAACTCTGGTTACATTACAGTTATTACAAAGTA
	1577	100025705	8:C>T	TGCAGTCGCGCACCAACACTTGGGTCCCTTTTATCCCATCCAGGTTCTTCTAAATGTGGACTCAAGACT
	1578	100026906	53:T>C	TGCAGTGGAGTGTTTTTAGATATCAGTATTGTCACCCCTTTGGATTTTGAGTTTGCAGAGGTGGCGTGA
	1579	100027247	23:T>C	TGCAGTGTAACTGATTATACACCTGAGGACACATTGTACCGCTAGGGTGATATGTGGCCTATCATTTTG
	1580	100027894	11:A>T	TGCAGTTATTCAGTCCTGGCTAATGAGAAAAACATTTAGCCAGGACTTCTGAACTGAAATGCATGAGAT
	1581	100123293	23:A>T	TGCAGAAGCGGAATCTCCACGAAACTGGCATGAGATCGGAAGAGCGGTTCAGCAGGAATGCCGAGACCG
	1582	100123434	18:G>A	TGCAGAATGTAAGAAAACGAGGCCTCTCCCAGGCCAGCAAGGGAGAGACGCATGAGATCGGAAGAGCGG
	1583	100123557	17:C>T	TGCAGACATATGGTTTACTCAGGAGCATGAGATCGGAAGAGCGGTTCAGCAGGAATGCCGAGACCGATC
	1584	100126449	23:C>T	TGCAGCTTACACAATGTAGTAAACTGCTTGCATGAGATCGGAAGAGCGGTTCAGCAGGAATGCCGAGAC
	1585	100127312	26:C>T	TGCAGGCTTGTTCCCCCAGGTCTTTACGGATCTGCTGCATGAGATCGGAAGAGCGGTTCAGCAGGAATG
	1586	100127819	25:G>A	TGCAGGGTTAATGGCTCCTCAGGGGGACAGCATGAGATCGGAAGAGCGGTTCAGCAGGAATGCCGAGAC
	1587	100128014	30:G>A	TGCAGGTGACTATCTTCCCATGGATCAGTGGTTTGGCAAGGTTTCTGAAGCATGAGATCGGAAGAGCGG
	1588	100128060	27:C>T	TGCAGGTGGATGCTCTGCCAACTGTGCCGTGATTTCATTAGCATGAGATCGGAAGAGCGGTTCAGCAGG
	1589	100128071	15:A>G	TGCAGGTGGGGGAGCAGGGCTGGCCGGGCTCAGCTGCTGGGGGTGATGAGCATGAGATCGGAAGAGCGG
	1590	100129021	20:C>T	TGCAGTGTCTGGTCACGGAACCTGAACAAATCCCAGCATATGATTTGCCACTCAGTGCATGAGATCGGA
	1591	100157733	30:T>C	TGCAGAACATCTCCAAATTCTAGGCAAGCATTCCCAACCCAGCTTCCAGGCAAGCCATTCCTACCCTTG
	1592	100159926	51:C>T	TGCAGACTCTCAGTACATTGTCTGTCTATATCAGTGGTCTCCAAACTGTGGCCCTTTGCATGAGATCGG
	1593	100165570	26:T>C	TGCAGCATCTGTGTTCACAAGTGCCGTCCAGACAAGGCACCTTTATCTCTGTTTAGTGATGTTGCCCGT
	1594	100176428	47:C>T	TGCAGTAACAGACACCTGCCATCACCTGATAAAGGGAAAGGTTTTCCCGGATGCTTTTAGTATCAAGAC
	1595	100177334	67:C>A	TGCAGTAGTGCATGTACAATCTGAGCATGAAAGACAGGAAGTGATGCGGCCTCTGTTTCCTGGCTGACC
	1596	100178522	51:T>C	TGCAGTCTACTCTGCAATAATCCTAACCATGCCACTGCTCTCCATTGAGAATATTTTGTCAATCCCTTT
	1597	100181042	47:G>T	TGCAGTGTGAAAGGAAGAAGCAGCACAAGCAGCCAATCAGTTCATATGCTGCAAAGAGGCATGAGATCG
	1598	100233811	33:T>A	TGCAGAAGAGTGATCTTTGTTCCTCTCTGCAAATATTCATTTTGTATATGTTGCAAGCATGAGATCGGA
	1599	100240692	9:C>T	TGCAGGTTGCGGCAGAACAATACACAGGAAAGGCTTAGACATTGAGCTTGCATGAGATCGGAAGAGCGG
	1600	100240692	10:G>A	TGCAGGTTGCGGCAGAACAATACACAGGAAAGGCTTAGACATTGAGCTTGCATGAGATCGGAAGAGCGG
	1601	100241114	19:A>C	TGCAGTCACACAGGTAAGAAGTTTCCACTAATGAATGCTTATCAAAGGCTTCTCTGCATGAGATCGGAA
	1602	100241989	22:T>A	TGCAGTGTGCCTTGGTGGGGCCTGTAGCTTACGCATGAGATCGGAAGAGCGGTTCAGCAGGAATGCCGA
	1603	100257749	27:T>C	TGCAGAAGAGGGTTAAAGCTGTGGGACTGAGTGCTGCTGTCACCTGCTGGGTGGATTGTTGCATGAGAT
	1604	100263216	15:A>C	TGCAGATGAAGAATTACAGCTGTTCCTTGTGTACAAGAACTCCTGTTGGGCACCACAGAGAAAAAGCTA
	1605	100272143	24:C>T	TGCAGCTTTCATTTAAAGTGTTGGCAAAGGATGAAAATGTTTACCTTATTGCATTCTCTGCATTAAGGT
	1606	100272144	47:A>G	TGCAGCTTTCATTTAAAGTGTTGGTAAAGGATGAAAATGTTTACCTTATTGCATTCTCTGCATTAAGGT
	1607	100274932	7:G>A	TGCAGGCGAGGTACGGGAAGGAGGCCGATTCTGGGAAGAAGGCAGCTGAGAGGATTTTGCTATTAGACA
	1608	100274932	39:A>G	TGCAGGCGAGGTACGGGAAGGAGGCCGATTCTGGGAAGAAGGCAGCTGAGAGGATTTTGCTATTAGACA
	1609	100274932	45:C>A	TGCAGGCGAGGTACGGGAAGGAGGCCGATTCTGGGAAGAAGGCAGCTGAGAGGATTTTGCTATTAGACA
	1610	100278887	32:C>A	TGCAGGTTTGTGATTCTGCACAGGGAGGCCAACTTGCCACAGAATATATACAGTACAGTCAGCATGAGA
	1611	100285178	28:C>G	TGCAGTTACAGGTTACAGCTCTTATACACGGAGTGAGAGCTGATTGGAGGAAAGGGACACACCCCTCCT
	1612	100318090	10:G>A	TGCAGACAGTGCTTGGCATCTAAACTCCAGCACCATACTGTGGGAGGAGATTGCATGAGATCGGAAGAG
	1613	100320243	23:C>A	TGCAGCAATTGCAAAAGAGATACCTGCCTGATCAGGCATGAGATCGGAAGAGCGGTTCAGCAGGAATGC
	1614	100320883	18:T>G	TGCAGCATCCGCTGTACATATCGAGGAGCTGTGCATGAGATCGGAAGAGCGGTTCAGCAGGAATGCCGA
	1615	100324983	39:G>T	TGCAGGTACCAAACTCTTGTGGCATCTCCAAACCCTATGGCAGCATGAGATCGGAAGAGCGGTTCAGCA
	1616	100325741	25:G>T	TGCAGTATGATGACAGAGGCTGGTCGGCAAGCAGTTAAAGAGCGTAGAGCTGCATGAGATCGGAAGAGC
	1617	100340696	40:G>T	TGCAGAGGAGAAGCTGTGACAGGCACGGATGTTTTAGTAAGCTGGAGAAATTAGATGCCACTTCTTGGC
	1618	100343294	34:G>A	TGCAGATGTTATTACATGGGAAAAACCATACAACGATTTAGACAACATATCCGCCAGTATGTACTCAGC
	1619	100359303	7:A>C	TGCAGTAAATTGCAGGAGGGCAGTCCACAAGACTCTATTTTTACTCTGTTGTTTACATTAATGCTGAGT
	1620	100360600	25:C>A	TGCAGTCACATGGGCTGCACAGATACGAAAAATAAGAAAATGAAAAGCTTAGAACTGAGCATGAGATCG
	1621	100372774	62:A>T	TGCAGTGAAAATCTGCAAAATGCAAAAAGCACTAAAAATGCATAGGTGTGAATCCAGCCTTAAACACAA
	1622	100482294	6:T>G	TGCAGTTCATTAAATGTTCATGCATTAACAGGCATGGCATTAAGGCCTCACAAACCAAAAATGGTGCAT
	1623	100502525	27:C>T	TGCAGTTCCTGCACCCGCAAACGCACTCTGTTTTTGCATGAGATCGGAAGAGCGGTTCAGCAGGAATGC
	1624	100568348	8:C>T	TGCAGGATCGGGGCACCACCAGTGCAGAGCTTGCTCAGGAATGGCAGCATGAGATCGGAAGAGCGGTTC
	1625	100598785	34:T>A	TGCAGCTCTGAGTGTTCGCTGCAAGATGCAGAAGTGGAGACTAGTGAGGAGCACGTGGGAGCGGCGTGT
	1626	100604506	16:A>C	TGCAGTTTGTAAAGTGAAGTCTTTTTGCCTTTAGTAAATCAACCCCACTGTGAGCAGGCAGGCTTTTGA

## Sheet: Table S3
	Table S3. Sex-linked markers (220 SNPs) isolated from 12 populations
	Ind.No.	Geographic population	Sex chromosome	SNP genotype(9=no data)
				SNP1	SNP2	SNP3	SNP4	SNP5	SNP6	SNP7	SNP8	SNP9	SNP10	SNP11	SNP12	SNP13	SNP14	SNP15	SNP16	SNP17	SNP18	SNP19	SNP20	SNP21	SNP22	SNP23	SNP24	SNP25	SNP26	SNP27	SNP28	SNP29	SNP30	SNP31	SNP32	SNP33	SNP34	SNP35	SNP36	SNP37	SNP38	SNP39	SNP40	SNP41	SNP42	SNP43	SNP44	SNP45	SNP46
	kameyama3	XY	XY	2	2	2	0	1	2	2	2	9	0	2	2	0	2	2	2	0	2	2	2	2	2	0	0	0	0	2	1	0	2	2	2	2	1	0	2	0	2	2	0	2	2	2	2	0	2
	kameyama11	XY	XY	2	2	2	0	0	2	9	2	1	0	2	2	0	2	2	0	0	0	2	1	2	0	0	2	9	0	2	0	0	2	0	2	2	1	0	0	0	1	2	0	2	2	0	2	0	0
	kameyama12	XY	XY	2	1	2	0	0	0	2	2	1	0	2	2	0	2	2	2	0	0	2	0	2	2	1	0	2	0	2	0	0	2	2	2	2	2	0	0	0	1	1	0	1	2	0	2	0	2
	kameyama13	XY	XY	2	1	2	0	0	2	1	2	1	0	2	2	0	2	2	0	0	0	0	2	2	2	2	0	2	2	2	0	0	2	0	2	2	2	2	2	0	1	2	0	1	2	0	2	0	2
	kameyama14	XY	XY	2	1	2	0	0	0	2	2	1	0	2	2	0	2	2	2	0	0	2	2	2	2	2	0	2	0	2	0	0	2	2	2	2	1	2	0	0	1	2	0	1	2	2	0	1	2
	kameyama2	XY	XX	0	1	0	0	2	2	0	0	1	2	0	1	0	1	0	1	0	0	2	0	1	0	0	1	0	0	1	1	0	1	1	1	0	0	0	1	0	1	0	0	1	1	0	1	0	1
	kameyama5	XY	XX	0	1	0	0	1	0	0	0	1	0	0	1	0	1	0	1	0	0	1	2	1	0	0	2	0	0	1	2	0	1	1	9	0	0	1	1	2	1	0	0	1	1	1	1	0	2
	kameyama6	XY	XX	0	1	0	0	0	2	0	0	1	0	0	1	0	1	0	1	0	0	2	2	1	0	0	0	0	0	1	0	0	1	1	1	0	0	1	1	0	0	0	0	1	1	2	1	0	2
	kameyama7	XY	XX	0	1	0	0	0	2	0	0	1	2	0	1	0	1	0	1	0	2	1	2	1	0	0	2	0	0	1	0	0	1	1	1	0	2	0	0	0	0	0	0	1	1	0	1	2	2
	kameyama8	XY	XX	0	1	0	0	9	2	0	0	1	0	2	1	0	1	0	1	0	0	1	2	1	0	2	1	9	1	1	0	0	1	1	1	0	0	0	0	0	0	0	0	1	1	2	1	2	0
	sekigahara1	XY	XY	2	2	2	2	9	2	2	2	2	0	2	2	0	2	2	2	0	2	0	2	2	2	0	0	2	0	2	0	1	2	1	2	2	2	0	0	0	2	2	0	2	2	0	2	1	0
	sekigahara10	XY	XY	2	2	2	2	0	2	2	2	2	9	2	2	0	2	2	2	0	0	0	1	2	2	2	0	2	0	2	0	2	2	2	2	2	2	0	2	0	2	2	2	2	2	2	2	0	2
	sekigahara2	XY	XY	2	2	2	2	0	0	2	2	2	9	2	2	0	2	2	2	0	0	0	2	2	2	0	0	2	2	2	0	2	2	1	2	2	2	0	2	0	2	2	0	2	2	0	2	1	0
	sekigahara3	XY	XX	0	1	0	0	0	0	0	0	1	0	0	2	0	1	0	1	0	0	0	2	1	0	2	0	0	2	1	0	2	1	2	1	0	0	0	1	0	2	0	0	1	1	2	1	1	0
	sekigahara4	XY	XX	0	1	0	0	1	2	0	0	1	0	0	2	0	1	0	1	0	2	2	0	1	0	2	0	0	2	1	0	2	1	2	1	0	0	0	2	0	2	0	0	1	1	0	1	2	2
	sekigahara5	XY	XX	0	1	0	0	1	1	0	0	1	0	0	2	0	1	0	9	0	1	0	2	1	0	0	0	0	1	1	0	2	1	2	1	0	0	0	2	2	2	0	0	1	1	0	1	9	2
	osaka1	Neo-ZW1	ZZ	1	0	0	0	0	0	1	1	0	0	1	0	0	0	1	0	0	0	0	0	0	1	0	0	1	0	0	0	0	0	0	0	1	1	0	2	0	0	1	0	0	0	0	0	9	2
	osaka10	Neo-ZW1	ZZ	1	0	2	2	2	0	1	1	0	0	1	0	0	0	1	0	0	0	0	1	0	0	0	0	9	0	0	0	0	0	0	2	1	1	0	1	0	0	1	0	0	0	0	0	9	2
	osaka6	Neo-ZW1	ZZ	1	0	2	9	0	2	1	9	0	0	1	0	1	0	1	0	0	0	9	1	0	2	0	0	1	0	0	0	0	0	0	0	1	1	0	1	0	0	1	0	0	0	0	0	0	9
	osaka9	Neo-ZW1	ZZ	1	0	0	0	0	0	1	1	9	9	9	0	0	9	9	9	0	0	9	2	0	1	0	9	9	0	9	0	9	0	0	0	9	1	0	9	0	0	1	0	0	0	0	0	9	9
	osaka11	Neo-ZW1	ZZ	1	0	0	0	0	0	1	1	0	0	1	0	2	0	1	0	0	0	0	1	0	1	0	0	1	0	0	0	0	0	0	0	1	1	0	1	0	0	1	2	0	0	0	0	0	2
	osaka2	Neo-ZW1	ZW	2	2	2	0	1	0	2	2	2	0	2	2	0	2	2	0	2	0	2	1	2	2	0	1	0	0	2	0	0	2	0	0	2	2	2	1	2	0	2	2	2	2	0	2	1	0
	osaka4	Neo-ZW1	ZW	2	2	2	0	2	0	2	2	2	0	2	2	2	2	2	0	2	0	1	2	2	2	1	1	2	0	2	0	2	2	0	1	1	2	2	2	0	0	0	2	2	2	0	2	0	2
	osaka5	Neo-ZW1	ZW	2	2	2	0	2	2	2	2	2	0	2	2	9	2	2	0	2	0	2	2	2	0	2	1	0	0	2	0	2	2	0	2	2	2	2	1	0	0	2	0	2	2	0	2	9	0
	osaka7	Neo-ZW1	ZW	2	1	0	0	0	0	2	2	9	0	1	1	0	1	2	9	2	0	1	1	2	2	2	9	1	0	0	9	0	2	0	1	1	1	1	1	0	0	1	0	0	2	0	0	9	0
	osaka8	Neo-ZW1	ZW	2	1	2	0	1	0	2	2	1	0	2	2	9	1	9	0	2	0	2	1	1	2	0	2	1	0	2	0	0	2	0	9	0	2	2	9	0	0	2	0	2	2	2	1	0	0
	kasiwabara3	Neo-ZW1	ZZ	1	0	0	0	2	2	1	1	0	1	1	0	1	0	1	9	0	0	0	1	0	1	2	0	1	1	0	0	2	0	0	0	1	1	0	0	1	0	1	0	0	0	0	0	0	0
	kasiwabara4	Neo-ZW1	ZZ	1	0	0	0	0	2	1	1	0	0	1	0	2	0	1	0	0	0	0	1	0	1	1	0	1	0	0	0	2	0	0	0	1	1	0	1	0	2	1	2	0	0	0	0	0	2
	kasiwabara7	Neo-ZW1	ZZ	1	0	0	0	1	2	1	1	0	0	1	0	0	0	1	0	0	0	0	2	0	1	2	0	1	0	0	0	2	0	0	0	1	1	0	1	9	0	1	0	0	0	0	0	2	2
	kasiwabara5	Neo-ZW1	ZZ	1	0	2	0	0	2	1	1	0	0	1	0	2	0	1	0	0	0	0	1	0	1	2	0	1	0	0	0	2	0	0	0	1	1	0	1	0	0	1	0	0	0	0	0	0	0
	kasiwabara10	Neo-ZW1	ZW	2	2	0	0	0	0	2	2	2	0	2	2	0	2	2	0	2	2	2	2	2	2	1	2	2	2	2	0	1	2	0	2	2	2	0	1	0	0	2	0	2	2	0	2	9	2
	kasiwabara12	Neo-ZW1	ZW	2	2	0	0	0	0	2	1	2	0	2	2	2	2	2	0	2	2	2	2	2	2	2	2	2	1	2	0	2	2	0	2	0	2	0	1	0	0	2	0	2	2	0	2	1	2
	kasiwabara2	Neo-ZW1	ZW	2	2	0	0	0	0	2	2	2	0	2	2	2	2	2	0	2	2	2	1	2	2	0	2	2	0	2	0	0	2	0	2	2	2	0	1	0	0	2	2	2	2	0	2	0	0
	kasiwabara6	Neo-ZW1	ZW	2	1	0	2	0	0	2	2	2	0	2	2	1	2	2	0	2	0	2	2	2	2	1	2	2	0	2	0	1	2	0	2	2	2	0	1	2	0	2	0	2	2	0	2	0	0
	kinomoto4	Neo-ZW2	ZZ	1	0	1	2	0	0	1	1	0	0	1	0	0	0	1	0	0	0	0	2	0	1	0	0	1	0	0	0	0	0	0	0	1	1	0	0	1	0	1	0	0	0	0	0	0	2
	kinomoto5	Neo-ZW2	ZZ	1	0	1	0	0	2	1	1	9	2	1	0	0	0	1	0	0	0	0	2	0	1	2	0	1	2	0	0	0	0	0	0	1	1	0	1	2	0	1	0	0	0	0	0	2	0
	kinomoto6	Neo-ZW2	ZZ	1	0	2	1	0	2	1	1	0	0	1	0	0	0	1	0	0	0	0	2	0	1	0	9	1	2	0	0	2	0	0	0	1	1	0	1	0	0	1	0	0	0	0	0	2	0
	kinomoto7	Neo-ZW2	ZZ	1	0	1	2	0	0	1	1	0	0	1	0	0	0	1	0	0	0	0	2	0	1	2	0	1	0	0	0	0	0	0	0	1	1	0	2	2	0	1	0	0	0	0	0	2	2
	kinomoto11	Neo-ZW2	ZW	2	2	2	2	2	0	2	2	2	0	2	2	0	2	2	2	0	2	0	0	2	9	1	0	2	2	2	0	2	2	0	2	2	2	0	2	0	0	2	0	2	2	0	2	1	0
	kinomoto3	Neo-ZW2	ZW	2	2	0	0	2	2	2	2	2	9	2	2	0	2	2	2	0	2	0	0	2	1	0	0	0	2	2	0	0	2	2	2	2	2	0	1	0	0	2	0	2	2	0	2	1	2
	kinomoto8	Neo-ZW2	ZW	2	2	2	2	1	0	2	2	2	0	2	2	0	2	2	2	0	2	0	0	2	1	0	0	2	0	2	0	0	2	2	2	2	2	0	2	0	2	2	2	2	2	0	2	0	0
	kinomoto9	Neo-ZW2	ZW	2	2	2	0	0	0	2	0	1	0	2	2	0	2	2	2	0	2	0	0	2	1	0	0	2	0	2	0	2	2	0	2	2	2	0	2	1	0	2	0	2	2	0	2	0	2
	kyoto6	Neo-ZW2	ZZ	1	0	0	0	2	0	1	1	0	1	1	0	0	0	1	0	0	0	0	2	0	1	0	0	1	0	0	0	0	0	0	0	1	1	0	1	0	2	1	2	0	0	2	0	0	9
	kyoto4	Neo-ZW2	ZZ	1	0	1	0	2	0	1	1	0	0	1	0	0	0	1	0	0	0	0	2	0	1	2	0	1	0	0	0	0	0	0	0	1	1	0	1	0	2	1	2	0	0	2	0	0	2
	kyoto1	Neo-ZW2	ZW	2	2	0	0	0	2	0	2	2	2	2	2	2	2	2	2	0	0	2	2	2	2	2	0	2	2	2	0	2	2	2	2	2	2	0	2	2	0	2	0	2	2	0	2	0	2
	kyoto5	Neo-ZW2	ZW	2	1	0	0	0	0	2	2	2	1	2	2	2	2	2	2	0	0	2	0	2	2	0	0	2	2	2	0	0	2	2	2	2	2	0	1	0	1	2	0	2	2	0	2	0	2
	kyoto2	Neo-ZW2	ZW	2	2	2	9	0	2	2	2	2	9	2	2	2	2	2	0	0	0	0	1	2	0	2	0	2	2	2	2	2	2	0	1	2	2	0	1	0	2	2	0	2	2	0	0	9	2
	yamagata1	Main-ZW1	ZZ	1	1	1	0	1	9	1	1	0	0	1	0	0	0	1	0	0	9	0	0	0	0	0	9	1	0	0	0	1	0	0	0	1	1	0	9	0	1	1	0	9	0	0	0	0	0
	yamagata3	Main-ZW1	ZZ	9	1	1	0	1	9	1	1	0	0	1	0	0	0	1	0	0	9	0	0	0	0	0	9	1	0	0	0	1	0	0	0	1	1	0	1	0	1	1	0	9	0	0	0	0	0
	yamagata4	Main-ZW1	ZZ	1	1	1	0	1	9	1	1	0	0	1	0	0	9	1	0	0	9	0	0	0	0	0	9	1	0	0	0	1	0	0	0	9	1	0	1	0	1	1	0	9	0	0	0	0	0
	yamagata6	Main-ZW1	ZW	2	2	2	0	1	9	2	2	2	0	1	0	0	1	2	2	0	1	0	0	2	0	0	1	2	0	2	0	1	2	0	2	0	2	0	1	0	1	2	0	1	2	0	2	0	0
	yamagata7	Main-ZW1	ZW	2	1	2	0	1	9	0	2	2	0	1	0	0	2	2	2	0	1	0	0	2	0	0	1	2	0	2	0	1	2	0	2	2	2	0	1	0	1	2	0	1	2	0	0	0	0
	yamagata9	Main-ZW1	ZW	2	2	2	0	1	9	2	2	1	0	1	0	0	1	2	2	0	1	0	0	2	0	0	1	2	0	2	0	1	2	0	2	0	1	0	1	0	1	2	0	1	2	0	2	0	0
	kurobe2	Main-ZW2	ZZ	1	0	2	0	2	2	1	1	9	0	1	9	0	0	1	0	0	0	0	0	0	1	0	0	1	0	0	0	0	0	0	0	1	1	0	0	1	1	1	0	0	0	0	0	0	0
	kurobe4	Main-ZW2	ZZ	1	0	2	0	2	0	1	1	0	0	1	0	0	0	1	0	0	0	0	0	0	1	0	0	1	0	0	0	2	0	0	0	9	1	0	1	0	1	1	0	0	0	0	0	0	0
	kurobei6	Main-ZW2	ZZ	1	0	1	0	1	2	1	1	0	0	1	0	0	0	1	0	0	0	0	0	0	1	2	0	1	0	0	0	0	0	0	0	1	1	0	1	1	1	1	0	0	0	9	0	2	0
	kurobe1	Main-ZW2	ZW	2	2	2	0	0	2	2	2	2	0	2	1	0	2	2	2	0	1	2	0	2	2	0	0	2	0	2	0	1	2	0	2	0	2	0	1	2	1	2	0	2	2	0	1	1	0
	kurobe3	Main-ZW2	ZW	0	2	2	0	0	0	2	2	1	9	2	2	0	2	2	9	0	1	2	0	2	2	0	0	1	0	2	0	2	2	0	0	0	2	0	1	2	1	2	0	2	2	0	2	2	0
	kurobe5	Main-ZW2	ZW	2	2	0	0	0	1	2	2	1	0	2	2	0	2	2	9	0	2	9	0	2	2	2	0	2	0	2	0	0	0	0	2	2	2	0	1	2	1	2	0	2	2	9	2	1	0
	tomiki3	Main-ZW3a	ZZ	1	0	1	0	2	1	1	1	0	1	1	0	0	0	1	0	0	0	0	2	0	1	2	0	1	0	0	0	2	0	0	9	9	1	0	2	0	1	1	0	0	0	0	0	2	2
	tomiki1	Main-ZW3a	ZW	2	2	2	0	2	1	2	2	2	0	2	0	0	2	2	1	0	0	2	0	2	1	0	0	9	0	2	9	2	2	2	2	2	2	0	1	0	1	2	2	2	2	2	2	1	0
	yamanaka3	Main-ZW3a	ZZ	9	9	1	9	0	1	1	1	0	0	1	0	0	0	1	0	0	0	0	2	0	1	0	0	1	0	0	0	0	0	0	0	1	1	0	0	2	1	1	0	0	0	0	0	1	0
	yamanaka1	Main-ZW3a	ZW	2	2	0	0	0	0	2	0	2	0	2	2	0	2	2	2	0	0	0	2	2	2	0	0	2	0	2	0	1	2	0	0	2	2	0	0	0	1	2	0	2	2	0	2	2	0
	yamanaka2	Main-ZW3a	ZW	2	2	0	0	0	1	2	2	2	0	2	2	0	2	2	0	0	0	0	1	2	2	2	0	1	0	2	0	2	2	0	2	2	2	0	0	1	2	2	0	2	2	0	2	2	0
	awara1	Main-ZW3a	ZZ	1	0	0	0	0	2	1	1	9	0	1	9	0	0	1	0	0	0	0	0	0	1	2	0	1	0	0	0	2	0	0	0	1	1	0	1	0	1	1	0	0	0	0	0	1	0
	awara6	Main-ZW3a	ZZ	1	0	1	0	0	1	1	1	0	0	1	0	0	0	1	0	0	0	0	1	0	1	0	0	1	0	0	0	0	0	0	0	1	1	0	2	1	1	1	0	0	0	0	0	0	0
	awara9	Main-ZW3a	ZZ	1	9	2	0	0	1	1	1	0	0	1	0	0	0	1	0	0	0	0	2	0	1	1	0	1	0	0	0	0	0	0	0	1	1	0	1	0	1	1	0	0	0	0	0	0	0
	awara2	Main-ZW3a	ZW	2	1	2	0	0	0	2	2	0	0	1	1	0	2	2	2	0	2	0	1	2	2	0	0	1	0	1	0	0	0	0	0	2	2	0	0	2	1	2	0	2	2	0	2	0	0
	awara3	Main-ZW3a	ZW	0	2	2	0	0	1	2	0	9	0	2	2	0	2	2	1	0	2	0	1	2	2	2	0	2	2	2	0	0	2	0	2	0	2	2	1	0	1	0	0	1	2	0	2	2	0
	awara7	Main-ZW3a	ZW	2	1	0	0	0	1	2	2	9	0	2	2	0	2	1	2	0	2	0	0	2	2	0	0	2	2	2	0	0	2	0	9	2	2	0	1	0	1	2	2	2	2	0	2	0	0
	mikata1	Main-ZW3b	ZZ	1	0	2	0	2	0	1	1	0	0	1	0	0	0	1	0	0	0	0	1	0	2	0	0	1	2	0	0	0	0	0	0	1	1	0	1	1	0	9	0	0	0	0	0	1	2
	mikata2	Main-ZW3b	ZZ	1	0	1	0	2	0	1	1	9	0	1	0	0	0	1	0	0	0	0	0	0	2	2	9	1	0	0	0	0	0	0	0	1	1	0	2	0	2	1	0	0	0	0	0	9	0
	mikata3	Main-ZW3b	ZW	2	2	0	0	0	0	2	0	2	0	2	2	0	2	0	2	0	0	0	2	2	0	1	0	2	2	2	0	1	2	0	2	2	1	0	1	0	0	2	0	1	2	0	2	2	2
	mikata4	Main-ZW3b	ZW	2	2	0	0	0	0	2	2	2	0	2	2	0	2	2	0	0	2	0	0	2	2	0	0	2	0	2	0	0	2	0	2	1	1	0	1	0	0	2	2	2	2	0	0	0	0
	mikata5	Main-ZW3b	ZW	2	2	2	0	0	0	2	2	1	0	2	2	9	2	2	2	0	2	0	1	2	0	2	0	2	1	2	0	2	2	0	2	2	1	0	1	1	0	2	0	2	2	0	2	0	2
	mikata6	Main-ZW3b	ZW	2	2	2	0	2	0	2	2	2	0	2	2	0	2	1	0	0	2	0	1	2	0	2	0	1	1	2	0	2	2	0	2	2	1	0	0	1	0	2	1	2	2	0	2	1	0
[truncated: 174 more columns]

## Sheet: Table S4
	Table S4. Sequences of the sex-linked markers (220 SNPs)
	SNP No.	CloneID	SNP	Sequence
	1	11016460	46:C>T	TGCAGAGCTCAGACTGAGGGAAGGAGAAGCAGTACAAGGAGATAATCGCTCTACAGTGCAAGAAGCATG
	2	11016652	32:T>G	TGCAGCCATCTGTTGTGTGGGCATCTGAAGTTTCAGTGTATTACTTCCTGGATTCTGTGCATGAGATCG
	3	11016673	30:C>G	TGCAGCCTGAGGTTCAGCTTGACTAAACACCCATTTAGTTTGGTCATTCCTTGAAACTCCAAGCATGAG
	4	11016864	26:T>A	TGCAGGCCTAGGGCCACATTTGGCCCTTTGCGGCCTCTGTCTGACCCACAATGCCTCCACTGTCAGCAT
	5	11017035	9:C>T	TGCAGTACTCTGGTAACAATTGGGGGAGTGGTTCCCACAGTGGCTGGGTCTTCCAGAGAAGCTGCATGA
	6	11017186	38:G>A	TGCAGTCGGCACTAGCTCCACATCTGGAGTTATCCCAGGAACATACCCCTAAGCTAATCACTGTCCCTA
	7	11017261	44:G>A	TGCAGTGATGGGCACTGATAGGCTGCACTAGTGGGCACTGATGGGTGGCACTGCTGAGGCGACACTGGT
	8	11017480	37:G>A	TGCAGTTCTCACTGCACTTGTTTTTTTCACCTTTTATGTTGCTCAAACATCCCCAAACTTCCCATTACC
	9	11018541	28:G>C	TGCAGAATGCGCACTAAACAGGTGAATCGATTGCATGAGATCGGAAGAGCGGTTCAGCAGGAATGCCGA
	10	11018596	28:C>T	TGCAGACAATTGCCTTCATTTCATCTCCCTGCATGAGATCGGAAGAGCGGTTCAGCAGGAATGCCGAGA
	11	11018703	8:T>C	TGCAGACGTTTCAGATCGTTCATAAGCATGAGATCGGAAGAGCGGTTCAGCAGGAATGCCGAGACCGAT
	12	11018894	5:C>A	TGCAGCGGTAACAATATACCATCTGAGTCTTCGCTAATGCATGAGATCGGAAGAGCGGTTCAGCAGGAA
	13	11018987	9:A>T	TGCAGATATAATAAAGAATGCCCATGTTGCATGAGATCGGAAGAGCGGTTCAGCAGGAATGCCGAGACC
	14	11019026	24:G>C	TGCAGATCATGAAGTTAACAATTTGTTAATAGAAGGGGATACTGGGATAATTGCATGAGATCGGAAGAG
	15	11019114	37:T>C	TGCAGATGTAGAATCAGAACAAATTCACAATTTTAGATAGCATGAGATCGGAAGAGCGGTTCAGCAGGA
	16	11019229	9:C>A	TGCAGCAAGCAAAGTTAGCAGTAGCATGAGATCGGAAGAGCGGTTCAGCAGGAATGCCGAGACCGATCT
	17	11019365	15:C>T	TGCAGCATAGACAGTCCTCCAACAATGCATGAGATCGGAAGAGCGGTTCAGCAGGAATGCCGAGACCGA
	18	11019393	6:G>A	TGCAGCGCGATCTGTCAACCACGAGCATGAGATCGGAAGAGCGGTTCAGCAGGAATGCCGAGACCGATC
	19	11019453	13:C>A	TGCAGCCAATTACCGGGAAACCCCTGAAGGGTCTCACGCATGAGATCGGAAGAGCGGTTCAGCAGGAAT
	20	11019506	14:G>T	TGCAGCCCAAGATTGTGTGGAGCAGCTGTTAGTCATCAACTGAGCATGAGATCGGAAGAGCGGTTCAGC
	21	11019546	7:A>G	TGCAGCCACCATTGTTGTGGAGGAACAAGTCCCAGCATGAGATCGGAAGAGCGGTTCAGCAGGAATGCC
	22	11019565	28:C>T	TGCAGCCTATCTGATTACTAGAGACCAGCGACATCACAAGCATGAGATCGGAAGAGCGGTTCAGCAGGA
	23	11019588	30:G>T	TGCAGCCTGAGATTGTGTAGACCAACTGCTGCCATATACTGAGCATGAGATCGGAAGAGCGGTTCAGCA
	24	11019596	6:T>C	TGCAGCTTGGATGATGGTAATCAGTTGTGCGCATGAGATCGGAAGAGCGGTTCAGCAGGAATGCCGAGA
	25	11019685	8:A>G	TGCAGCTAAAGAGGTTAATTAGGCATGAGATCGGAAGAGCGGTTCAGCAGGAATGCCGAGACCGATCTC
	26	11019888	14:T>C	TGCAGCTGTTCATCTGCTGCATAATATGGCATGAGATCGGAAGAGCGGTTCAGCAGGAATGCCGAGACC
	27	11019918	9:C>T	TGCAGCTTCCGGGACCACCGCAGGATTAGACGTGTCCGGAGCCAACCACCAGCATGAGATCGGAAGAGC
	28	11019964	13:A>T	TGCAGGAAAAATAATAGAGTCTATGCATGAGATCGGAAGAGCGGTTCAGCAGGAATGCCGAGACCGATC
	29	11020004	33:T>C	TGCAGGAATATATCCCAGCATTCCTCGGGCCCTTCAGCTCCCAGCATGAGATCGGAAGAGCGGTTCAGC
	30	11020260	36:C>G	TGCAGGCTGAGCTGCACCTCCTTGCCTGATGTTAATCACACTAATGTCTGCATGAGATCGGAAGAGCGG
	31	11020378	18:C>T	TGCAGGTACAAAATCTTGCAGTGGGCCAAATTTGGCATGAGATCGGAAGAGCGGTTCAGCAGGAATGCC
	32	11020444	39:C>T	TGCAGGTGAACAGACTGCTGGGAGAAGCTATAAGAAGGACTGGATTGAGGCATGAGATCGGAAGAGCGG
	33	11020641	13:G>A	TGCAGTACTCCTAGTACACAGCATGAGATCGGAAGAGCGGTTCAGCAGGAATGCCGAGACCGATCTCGT
	34	11020668	29:A>T	TGCAGTAGCAACAGATGCTTTTATTGTTTACTTGAAATCTGTTTAGCATGAGATCGGAAGAGCGGTTCA
	35	11020741	12:G>T	TGCAGTATGAATGGGGAAAGTACTGTGCATGAGATCGGAAGAGCGGTTCAGCAGGAATGCCGAGACCGA
	36	11020794	13:C>T	TGCAGTCACTGTCCACATACATGCATGAGATCGGAAGAGCGGTTCAGCAGGAATGCCGAGACCGATCTC
	37	11020913	9:G>A	TGCAGTCTCGGCTTTCTGGCAAAAGGCAAAAAGGCATGAGATCGGAAGAGCGGTTCAGCAGGAATGCCG
	38	11021043	8:T>C	TGCAGTGATTCATAAAATAGCCTTAGCATGAGATCGGAAGAGCGGTTCAGCAGGAATGCCGAGACCGAT
	39	11021077	18:A>G	TGCAGTGCAGCTCCTAATATGCAAGATCAATGCACCCACTTCTGGTCAGCATGAGATCGGAAGAGCGGT
	40	11021101	25:G>T	TGCAGTGCCATAACACCCCTGCAATGTTGGCATGAGATCGGAAGAGCGGTTCAGCAGGAATGCCGAGAC
	41	11021214	20:C>T	TGCAGTGGTAGATCTGGGACCAGCATCTACAAGAGAGTTGGAGGTACTCCAGCATGAGATCGGAAGAGC
	42	11021286	17:T>C	TGCAGTGTCGGTTATTCTTAATGGCATCCCCACGCACCTTCCAACATGCATGAGATCGGAAGAGCGGTT
	43	11021486	23:A>G	TGCAGTTGCAAGTTCCCTTTCCCAGGCTTGGCATGAGATCGGAAGAGCGGTTCAGCAGGAATGCCGAGA
	44	11023121	30:C>A	TGCAGCTTCCTGGAGGGACTATCCTGGTCCCGGCAATGGTTGACTCCGAAGCATGAGATCGGAAGAGCG
	45	11023189	12:A>G	TGCAGTGAAAAAAAAGTTCAGCATGAGATCGGAAGAGCGGTTCAGCAGGAATGCCGAGACCGATCTCGT
	46	11023304	5:G>A	TGCAGGCAAAGCACAGCATGAGATCGGAAGAGCGGTTCAGCAGGAATGCCGAGACCGATCTCGTATGCC
	47	11023696	21:T>C	TGCAGAAAATCAAATAGTGTGTATGGGGCCTTTGTCATCATTCAGATCTGTGCTGTCCGTTGAGGTGCA
	48	11023817	24:A>T	TGCAGACATCCTCCCAGTACAACCACTTAAAGCCAAATGATGTACATGTACATAATCTGGCATTAAGTG
	49	11023824	63:A>C	TGCAGACATGCAGGAGACTTTTATAGACTGTGAACTTGCTGAAGGAGATTTTCAGAGACTGTGAGCATG
	50	11024136	67:A>T	TGCAGCACAATGCTATCATCCAGACTAACCAAAATCTGAGCACTCATGAGCAAGTGACTATTCCATTAA
	51	11024401	44:T>G	TGCAGCTGTCTTCAGTTGTTCTTTGTGGGTCTTTATGCCTTTAGTTTTGCCTTCAGCAAGTGAGAAATG
	52	11024499	63:A>G	TGCAGGCAATGTGGAGCAAGTCATTAACATTTAGAAGCACTGAAGTCTGTTAAAGTGTAACTAAAAGCA
	53	11024553	33:G>C	TGCAGGCTAAGCCATTTGACAGTTCTTACTTAGGTACAATAAGGGACGGGGCCACCTGGCCACCAGTGC
	54	11024794	18:C>A	TGCAGTACAATGTGGCAGCTCATTCATATGAATGTCCTGCAAATTGCCCTGGCCTGCACAAAAAGTAGT
	55	11024941	18:G>A	TGCAGTCAAGTAATATCTGACCCTCCTTTAGATGAAACTGTACAGTGGAAGGCAGCCCAATAATGAGCT
	56	11025153	64:C>G	TGCAGTGATGTTAGGGAACTAATCTGCTCCTCTATCATTGCCTAACCAGTCACCCACCAGCCCTCCTAT
	57	11025232	24:G>C	TGCAGTGGAAGGCAGCTCACAACTGCGCCCTGTCCTCTCCAGGTTGCCAGCCTGAAACTGCTTCTACCA
	58	11025384	29:C>T	TGCAGTTAATACAGAGGAAGGCAAAAACTCTTCATAAACAATGGTCTGAACTGGTCTGTAAAACAATTA
	59	11025402	8:G>A	TGCAGTTAGCCTGTCTCTATCCCAGATATTGAGACAGATCATGCTGAGCTAGCTCAGAAAAGCATGAGA
	60	11025474	68:A>G	TGCAGTTGACACAGTGCTGCACATGTGATCATCCATTTGATGGCTGGATAGATTGGTTGAGAGCACAAA
	61	11026177	32:G>A	TGCAGAAACGGTTAAAAGCAACGTGGATAGATGTGAATCGAGCCTAAGTGGTGCATGAGATCGGAAGAG
	62	11026355	14:G>C	TGCAGAATTCAATAGCCAGATGCATGAGATCGGAAGAGCGGTTCAGCAGGAATGCCGAGACCGATCTCG
	63	11026375	22:C>T	TGCAGACAATATGATTGTATGCCATAAAATAGCAGGTATACAAACAGCATGAGATCGGAAGAGCGGTTC
	64	11026379	35:A>T	TGCAGACAATGTGCAGCACTACCAAGCAATAAGCCAGCATGAGATCGGAAGAGCGGTTCAGCAGGAATG
	65	11026386	30:T>C	TGCAGACACAACTTAGTTGAGTTTACTGGGTTTGCGCACCCTGCATCTTCCTCTTTGCATGAGATCGGA
	66	11026564	12:A>G	TGCAGAGAAAGCACGTTCATGGTTTGAATGGGAAGCATGAGATCGGAAGAGCGGTTCAGCAGGAATGCC
	67	11026616	11:T>C	TGCAGAGAGACTTCTGCTTCCACACAGAGGGCAAGAGTCCTACTCTACAGCATGAGATCGGAAGAGCGG
	68	11026649	33:C>T	TGCAGAGCAATGTCTCACCGGAGGTGTAGGTGGCCGGGGATGGCATGAGATCGGAAGAGCGGTTCAGCA
	69	11026716	42:T>C	TGCAGAGGCAAACTACAAGTCTCAGCATGTCTTGTCAGCTTCTGGCCAACACGGCATGAGATCGGAAGA
	70	11026725	32:A>G	TGCAGAGGCCAAGCAGATCTGCATGTTATTGGATGTCAGCATGAGATCGGAAGAGCGGTTCAGCAGGAA
	71	11026868	18:T>C	TGCAGATATTGATAAAGCTGATGCAGGAACGAGGGCATGAGATCGGAAGAGCGGTTCAGCAGGAATGCC
	72	11026904	19:G>C	TGCAGATCCCTTTGTAGGAGAGCAGCATGAGATCGGAAGAGCGGTTCAGCAGGAATGCCGAGACCGATC
	73	11026976	18:G>T	TGCAGATGCATAGGAATCGCATGCATGAGATCGGAAGAGCGGTTCAGCAGGAATGCCGAGACCGATCTC
	74	11026980	15:A>T	TGCAGATGCCTAAACAGTATGCTGAGCTGTGCATGAGATCGGAAGAGCGGTTCAGCAGGAATGCCGAGA
	75	11026990	12:C>G	TGCAGATGCTTTCGGCAATCTACATCACACTATGCATGAGATCGGAAGAGCGGTTCAGCAGGAATGCCG
	76	11027013	16:A>G	TGCAGATGTAGCAATAACCCCCTGTGGCGCAGGCATGAGATCGGAAGAGCGGTTCAGCAGGAATGCCGA
	77	11027124	6:A>C	TGCAGCAAGCAAGGCTAGCAGTAGCAGACTATTAGCATGAGATCGGAAGAGCGGTTCAGCAGGAATGCC
	78	11027132	39:T>G	TGCAGCAATATCTTACATGTATGACCTCCCCATAAAAACTCATGCATGAGATCGGAAGAGCGGTTCAGC
	79	11027137	29:A>G	TGCAGCAATGAGAATACAGCTCTCTCAACATTGCATGAGATCGGAAGAGCGGTTCAGCAGGAATGCCGA
	80	11027226	6:G>A	TGCAGCGGAATTGAGTGCTTAGACACAAAGGCATGAGATCGGAAGAGCGGTTCAGCAGGAATGCCGAGA
	81	11027287	20:C>T	TGCAGCATAGAGGATACCTTCCATTTACTGCATGAGATCGGAAGAGCGGTTCAGCAGGAATGCCGAGAC
	82	11027319	11:A>G	TGCAGCATGTCACACGTGTGCATTTGTTGGCATGAGATCGGAAGAGCGGTTCAGCAGGAATGCCGAGAC
	83	11027347	27:T>C	TGCAGCATTGGTAGAACTTGGGAATTTTGGAGCATGAGATCGGAAGAGCGGTTCAGCAGGAATGCCGAG
	84	11027389	27:C>T	TGCAGCCAGGAAAGAGGTCTTCCACTGCCCGCTGTCAGAACTGGCATGAGATCGGAAGAGCGGTTCAGC
	85	11027735	34:G>A	TGCAGCTGCCATACAGGACCTGTTTGGTCAGGACGTGATTGTTCCCGTTATGCATGAGATCGGAAGAGC
	86	11027950	8:A>C	TGCAGGAGATGCAGGCCATTCTCTAGGCATGAGATCGGAAGAGCGGTTCAGCAGGAATGCCGAGACCGA
	87	11028238	8:A>G	TGCAGGGCAAAGAGAACCAAGTTTAGGTCACAAGCAAGCACAGCATGAGATCGGAAGAGCGGTTCAGCA
	88	11028297	13:C>T	TGCAGGTAACCCACGTGTTCAGCACATCCTTATGCATGAGATCGGAAGAGCGGTTCAGCAGGAATGCCG
	89	11028360	28:A>G	TGCAGGTCAGGGGTGATGGTTACAGTGGACACACTGCATGAGATCGGAAGAGCGGTTCAGCAGGAATGC
	90	11028392	20:T>G	TGCAGGTCTATGGCTTCAGGTCATTTTTGGCATGAGATCGGAAGAGCGGTTCAGCAGGAATGCCGAGAC
	91	11028520	24:T>G	TGCAGTAAAAATCTAATCAGTGGTTAGCATGAGATCGGAAGAGCGGTTCAGCAGGAATGCCGAGACCGA
	92	11028646	11:G>A	TGCAGTACTTGGAAACACTGTGAAACAAGCATGAGATCGGAAGAGCGGTTCAGCAGGAATGCCGAGACC
	93	11028838	10:A>T	TGCAGTCCACACAGATAGCTGAAAACAATGTCATTGTTAAGCATGAGATCGGAAGAGCGGTTCAGCAGG
	94	11029030	28:T>G	TGCAGTGAAGCCTTGCGGCTTTACAGCATGTTTCTCGCTGTGCATGAGATCGGAAGAGCGGTTCAGCAG
	95	11029132	18:T>C	TGCAGTGCATTTTCTGAGTACCAGCATGAGATCGGAAGAGCGGTTCAGCAGGAATGCCGAGACCGATCT
	96	11029190	30:C>G	TGCAGTGCTGGCCGTCCCTTTCCATACCTTCCTGTATTCCCAGCATGAGATCGGAAGAGCGGTTCAGCA
	97	11029202	16:C>T	TGCAGTGGAAAAATTGCAGCTAGCAATGCATGAGATCGGAAGAGCGGTTCAGCAGGAATGCCGAGACCG
	98	11029233	40:G>A	TGCAGTGGCTGCACATGCAGCAGAGGACCATCAATGAGTGGCTGCTGATAAAGGATGCATGAGATCGGA
	99	11029324	27:T>C	TGCAGTGTGCATGAGCCCTTAAAATGGTCAGGCATGAGATCGGAAGAGCGGTTCAGCAGGAATGCCGAG
	100	11029342	25:A>C	TGCAGTGTGGTGTGCTGCCAAAAAAAGATGCATGAGATCGGAAGAGCGGTTCAGCAGGAATGCCGAGAC
	101	11029348	37:G>A	TGCAGTGTGTGATCACAGTGACAGCAAACCGGCGGTAGCACGCATGAGATCGGAAGAGCGGTTCAGCAG
	102	11029381	27:G>A	TGCAGTTAAGACACTTTGGAAAAAGGCGCAGCATGAGATCGGAAGAGCGGTTCAGCAGGAATGCCGAGA
	103	11029530	19:G>A	TGCAGTTGCATTTTTGTGAGTCATGTGTCCATGTTCCACAGGTGCATGAGATCGGAAGAGCGGTTCAGC
	104	11029550	20:A>G	TGCAGTTGGCGGTTCGGTCTATTGTCCCAGAAATGGTCCTCCCTACGTTTTTGCATGAGATCGGAAGAG
	105	11029629	6:T>A	TGCAGTTTGCAAAAGATCATCTGAATACAGGCATGAGATCGGAAGAGCGGTTCAGCAGGAATGCCGAGA
	106	11030696	19:A>T	TGCAGACATGCCACAGGAGATGGTCAGGGACTGTAGGCATGAGATCGGAAGAGCGGTTCAGCAGGAATG
	107	11031025	6:A>G	TGCAGAACCAATAATGTCCCAGTACATTATTCTGTCACCTGCCCCAACATTTGCCATGCATGAGATCGG
	108	11031027	62:G>A	TGCAGAACGACAACAAAAATGTGCTTCTTGTGTGTTTACATACAATCTGGTTTTAGGAAGGGGAACTAT
	109	11031035	11:C>T	TGCAGAACTCTCTGGCAAGAAACAGTTAAAGTGTTACTAAACCCACAACAGTAAAATCAGTCTGTATAT
	110	11031107	59:G>T	TGCAGACAATACGGGAGGCCATGGGGGGAACTAAGGACTTATTCTTCAATATGAGGCACGTCAAGCATG
	111	11031343	18:C>A	TGCAGATACATTTATAGACGACTCTTGTCTTGACTTTGGACTTAAAGATGTTGGTAAAGGCATGAGATC
	112	11031421	18:C>T	TGCAGATGAGGTCTACTGCTAGAATTACTGCCCTCGATCAGACATTCACGGTAATAACTCGCATGAGAT
	113	11031482	35:A>G	TGCAGATTGGAGTTTTTGGGCTGAGGAAGAGTGCAACAGCGGGGTGATGGCACGTAACACAGCCAGCAC
	114	11031617	9:C>T	TGCAGCATTCCCTTCCACCCACCCCTTGCACAGTCACATCTTCTTCTCTCCAATCAGAGATGCGCATGA
	115	11031693	59:G>A	TGCAGCCGTTCTAGGTATTATACAGTATACTTGTGATTTTGCATGGTGTTGGCATGGGAGTGATAAACA
	116	11032036	46:C>T	TGCAGGCAGCAGGGTGCCATGGGATATGTAGTCCTTAGAAATGGAACGCAAACAATGGAGAAGCTGGAA
	117	11032100	37:T>C	TGCAGGCTGTGGTTCCACCCATCTGCTGTTACGTCAGTAAACCATCTAGCATCCTGTGGGTTAAACCAT
	118	11032345	37:C>T	TGCAGTAATGCCTGGTACACACAATGAGATTATTGGACGAATGATCGTCCATTCTTTTTTGCATGAGAT
	119	11032354	24:C>T	TGCAGTACACCACAATGCATATACCATTTAAAGTATTGGACCAGTGCTTGCTCCATTGCATGAGATCGG
	120	11032683	35:G>T	TGCAGTCTTAGAGGTGACCTGGTTTAGAACCTTCAGGGAGGCAGGAGGAGGGAGGTACAACCCAACTAT
	121	11032776	45:C>T	TGCAGTGCATTAGTGCACATTAGTGCAACCTCATCAGTGCACCCTCATCAGCACCCATCAGTGCATGAG
	122	11032801	38:A>G	TGCAGTGCGAGATCATCAAAGACATTGCTGCCTCTAACACCTGATAACCAGATGTTACATCACACCACT
	123	11033812	33:A>T	TGCAGACAGACCACTGCTTCCACATAGAGAGCAAGGGTCCTACTCAGCAGCATGAGATCGGAAGAGCGG
	124	11033829	14:C>A	TGCAGACAGTAATCCGTTGTGGTGAAGTGCTGGGAGCATGAGATCGGAAGAGCGGTTCAGCAGGAATGC
	125	11033854	18:T>A	TGCAGACATGGGGTATCATGGGGTAATTTATGTCAGGGCAGCAATGCTTTGCATGAGATCGGAAGAGCG
	126	11034038	22:C>A	TGCAGAGAGACTGCTGCTTACACACAAAGAACAAATGTCCTCCTTTGCAGCATGAGATCGGAAGAGCGG
	127	11034058	14:A>G	TGCAGAGAGTTTCCATTGCTGACTTCCTTCTAAGCATGAGATCGGAAGAGCGGTTCAGCAGGAATGCCG
	128	11034238	5:A>G	TGCAGATAGGCCGATGCTTCCACACAGAGAGCATTGGTCCTTTTCTTCAGCATGAGATCGGAAGAGCGG
	129	11034380	15:A>C	TGCAGATGTGCTTTCATGGTGAAAAGCTATTCGATTCTCTGAAAGGTGGTGCATGAGATCGGAAGAGCG
	130	11034476	16:A>G	TGCAGCACAACTTTGTACACCACAGCAAGCCTTTGTAACCACCAGCATGAGATCGGAAGAGCGGTTCAG
	131	11034538	47:T>C	TGCAGCAGAAAAGCAGGAGAGAAAACCAGAAGATGTCATTCAGCTGGTATCCAGCATGAGATCGGAAGA
	132	11034590	19:C>T	TGCAGCAGCTGTCTCCTATCACAAGCATGAGATCGGAAGAGCGGTTCAGCAGGAATGCCGAGACCGATC
	133	11034688	46:G>A	TGCAGCCAAATTTGAGAACCCCTACCCTATGGTTATGTGTTCCCATGCACACAGCATGAGATCGGAAGA
	134	11034919	36:C>G	TGCAGCGTGATCTGTTAGATCTGACAGATCAGTGTACCGGCATGAGATCGGAAGAGCGGTTCAGCAGGA
	135	11034945	40:G>A	TGCAGCTAAGCACTCCCACTCGCTTGTAATCACTCGTGCAGTAATTGCATGAGATCGGAAGAGCGGTTC
	136	11034984	31:G>C	TGCAGCTCAGAATTGAAATAGCAGATGCTGTGAATGGTGCATGAGATCGGAAGAGCGGTTCAGCAGGAA
	137	11034998	10:C>T	TGCAGCTCCACGGAGGGATTATAAAGGTCCTAGCAATTGTTGATTCCAGAGCATGAGATCGGAAGAGCG
	138	11035161	26:C>T	TGCAGCTTTACACAGACGGAAGGAATCGGTTGATTTTGTTCATTGTGCATGAGATCGGAAGAGCGGTTC
	139	11035509	12:G>A	TGCAGGGAAACCGCATGGTCATAAAGGTGCATGAGATCGGAAGAGCGGTTCAGCAGGAATGCCGAGACC
	140	11035670	7:C>T	TGCAGGTCAAGTGCACCTGTCAATGAATTTTGAACAATTTCAGAAGCATGAGATCGGAAGAGCGGTTCA
	141	11035778	18:A>G	TGCAGGTTATCACCAACAAGAGGCCTGTCCTGAGCAATGGCATGAGATCGGAAGAGCGGTTCAGCAGGA
	142	11035830	36:A>T	TGCAGTAAACAAATCAATACATTTGAGATTGTTGATAGTGGAACTACAATGGCCAGCATGAGATCGGAA
	143	11035930	32:G>A	TGCAGTACCCAAAGCTGCCTCAATACCCCAACGGTGACTATATCTGATTGCATGAGATCGGAAGAGCGG
	144	11036048	50:C>G	TGCAGTATGTCTGGCTGCAAGAAACAGGTAGAGATGGTGTCTGATGATGTCATGCATGAGATCGGAAGA
	145	11036201	10:G>A	TGCAGTCTAGGATCTAAAGGCATTTCTTCCAAATTTCAGGCTCAGCATGAGATCGGAAGAGCGGTTCAG
	146	11036232	16:T>C	TGCAGTCTCTGACCATTTCTGTAGTACGCATGAGATCGGAAGAGCGGTTCAGCAGGAATGCCGAGACCG
	147	11036420	48:C>T	TGCAGTGCTAGAGATCAGTGCAAAGTCTATACCACCCTTACAGAAATTCTTAACTGCATGAGATCGGAA
	148	11036611	9:T>C	TGCAGTGTTTCTATGATAACATGAAGCATGAGATCGGAAGAGCGGTTCAGCAGGAATGCCGAGACCGAT
	149	11036662	46:C>A	TGCAGTTATACCAACCTGTCACTGCGTCTTTACCATATCTTTACTGCAACTATACTGCATGAGATCGGA
	150	11036792	15:G>T	TGCAGTTGTTTCTTTGCTGTTGTTTTTGGCCTTTCATAGTTGCATGAGATCGGAAGAGCGGTTCAGCAG
	151	11037465	20:G>A	TGCAGTTATCGCCTGGTCACGGGCATTGATGAGCATGAGATCGGAAGAGCGGTTCAGCAGGAATGCCGA
	152	11037674	21:G>A	TGCAGTGCTCATATATGAACAGGGAGCATGAGATCGGAAGAGCGGTTCAGCAGGAATGCCGAGACCGAT
	153	11037866	5:G>A	TGCAGGCATGTTTTACAAGCATTTTCCATGGGTTACCATTTGTCCCTATGGAAACTTGCATTAAAGATG
	154	11037899	13:G>A	TGCAGACTACTGGGATATATACGTCATGCCTGCCAGGAGGCTTTGGGGCAGTCCACAACTTTTGAGCAT
	155	11038351	54:T>C	TGCAGCCAGCAAGTCCACCATTCTCAACTATCTGGACAGCAATTCAGAAGTTTGTGAGGCATGAGATCG
	156	11038722	63:T>A	TGCAGGCCAATTCTCAATTACCAGCAACTATGTTATACTCTTATCTACAACTCAGGCACGCTGTAAGCA
	157	11038855	13:T>C	TGCAGGTATTTGATCAGCTGGATGGGTCAGATGCCCCTTTCACCCACCAAACGCAATGATGAGATATGA
	158	11038960	46:T>C	TGCAGGTTAGATCTTTGTAATGTGTTCACAATGACTTCTCTTCATCTTTCTTCTAAGCCCTGTTCTTTC
	159	11039008	25:G>T	TGCAGTAAATGTTTTCATTTTACAGGGACAGCTACCCAGCATTCTATAGATATTCTCTGGCATGAGATC
	160	11039315	9:A>G	TGCAGTCTCAGTATCTGATTGGCCAAGCACAACCCTAGAAATGAATATCAGCTCAGAAAATATTGCATG
	161	11039744	28:C>A	TGCAGTTCCAGTGTCTACCAGCAGGTGTCTCCCACAAGCCAGAAGGCAAATGTCCAACAAGCATGAGAT
	162	11039787	18:T>A	TGCAGTTCTTTGAATGCCTCTGCAACATACATTGTACATTGTGGTGCTCTGCAATACAGGTGATTCTGC
	163	11040338	10:T>A	TGCAGAATAATGTAAAACAGGCTGGATGATGGCAATGAGCATGAGATCGGAAGAGCGGTTCAGCAGGAA
	164	11040586	23:A>T	TGCAGAGCAGCATCCACACATAGAGTGAGAACTGATACTGAGCATGAGATCGGAAGAGCGGTTCAGCAG
	165	11040628	22:C>T	TGCAGAGGAGGGATAAGTGAGCCCCACTGTGAAAGTGCATGAGATCGGAAGAGCGGTTCAGCAGGAATG
	166	11040921	14:G>A	TGCAGCACAGGCGTGATGACGTCACCAGGAGGAACAAGCAGCAACACATTTCTGAGCATGAGATCGGAA
	167	11041014	13:G>A	TGCAGCATCACTGGTTGCTAGGAGGCTGTCAGCTCTCTGCTACACTGCATGAGATCGGAAGAGCGGTTC
	168	11041343	13:C>T	TGCAGCTGCCACACGTCCATGTTTCTTAGGTGCATGAGATCGGAAGAGCGGTTCAGCAGGAATGCCGAG
	169	11041437	13:G>A	TGCAGCTTTCTCTGACAATTAAGAAGCTAGGGAGTGTCACTAAACACACGGCATGAGATCGGAAGAGCG
	170	11041503	14:G>A	TGCAGGAGCATGGTGTTGCATCTGCGATCCACTGAATGTGGGTTCAATGCTCTGCATGAGATCGGAAGA
	171	11041597	11:A>G	TGCAGGCCAAAATGGCATGAGCATGAGATCGGAAGAGCGGTTCAGCAGGAATGCCGAGACCGATCTCGT
	172	11041787	29:C>T	TGCAGGTCACTGCGGGATCCATTGCAGCACTTCTGCACTTGCATGAGATCGGAAGAGCGGTTCAGCAGG
	173	11041896	35:A>G	TGCAGGTTGTCAATCTGTTCTCCAAGCTCAGCGACACTGTCAGCATGAGATCGGAAGAGCGGTTCAGCA
	174	11041942	50:T>G	TGCAGTAAGGCTTTTTTCTCCCTTGTTGCAGGTCCACACTGGGGCCCAACTTATGTGCATGAGATCGGA
	175	11042008	18:C>T	TGCAGTACCCGCTGTGTACTATCACAGCGGGAGCGGGTCACCAGCGGTGCATGAGATCGGAAGAGCGGT
	176	11042085	20:A>T	TGCAGTCAAATGAAGGCTTGAGATGCATGAGATCGGAAGAGCGGTTCAGCAGGAATGCCGAGACCGATC
	177	11042233	49:G>C	TGCAGTGAAAGTGAAGCTTTGACATCCCAATTGTTTTGGTAGCAAAAGGGAGACAGCATGAGATCGGAA
	178	11042284	7:T>C	TGCAGTGTACATCCTTATCCGAGCATGAGATCGGAAGAGCGGTTCAGCAGGAATGCCGAGACCGATCTC
	179	11042343	9:G>A	TGCAGTGCTGATGGAGAGGGGCACACAAGGATGCTGTGCATGAGATCGGAAGAGCGGTTCAGCAGGAAT
	180	11042474	14:G>A	TGCAGTGTGTGTCCGCAGTGTAACTGGGTGTCCATTCAAGAGGATGCATGAGATCGGAAGAGCGGTTCA
	181	11042620	14:C>T	TGCAGTTTGAGCTCCTTGATCTCCACCTGGATCCCGATGGGCGTTATGTGGTCATGCATGAGATCGGAA
	182	11042649	25:A>G	TGCAGTTTTCTGTAGAATGTACACTAAGCTGCGCATGAGATCGGAAGAGCGGTTCAGCAGGAATGCCGA
	183	11043077	17:C>A	TGCAGCATTCTTTGGAGCCACCATTGCATGAGATCGGAAGAGCGGTTCAGCAGGAATGCCGAGACCGAT
	184	11043451	51:T>C	TGCAGAGTATCACTGCCTGTACTGTACATGACCCCTGTGTAATTAAGTATGTGTTTCGTCATCAAGTAA
	185	11043519	10:A>C	TGCAGATATCAAGTTGCCTTCATGGGTGGGTGTCAGTCTGGAGGAGTGGCCATTCTGAGGCAGGCTGTT
	186	11043584	14:T>G	TGCAGATGAACAGGTATCCCCCACTCCTGCACAGCCAGACACACCGAATCTTCACAGGCATGAGATCGG
	187	11044106	38:G>A	TGCAGGCCGCATCCATCTTCGTCCCAATATGACATCCTGCGTGAGTGCAGATACATGTCCCTGAGCTCT
	188	11044331	10:G>A	TGCAGTAACCGGTCCAAGATTAGTTGAGGAGGGGTCAACCCCGTCATTTCAAGCCAAGCATGAGATCGG
	189	11046022	16:G>A	TGCAGCGGAGGGGAGCGTGAGGACTGCTGAATGTGTCAGATTCCAGCATGAGATCGGAAGAGCGGTTCA
	190	11046048	19:T>C	TGCAGCTAAGTCGAAAAGCTTGTCCTTTACCAGCATGAGATCGGAAGAGCGGTTCAGCAGGAATGCCGA
	191	11046288	36:A>G	TGCAGGCTAAGAGCATAGGCAAGCGTAGTAAAAACCAGCATGAGATCGGAAGAGCGGTTCAGCAGGAAT
	192	11046467	28:A>C	TGCAGTAAAATGACGGCGGCTGATCGGGAAGTGGTTAAAGCATGAGATCGGAAGAGCGGTTCAGCAGGA
	193	11046468	7:C>A	TGCAGTACACCATGTGTGAACGAAGCATAAGACAGGCAAAGATGCTAGTCAGCATGAGATCGGAAGAGC
	194	11046772	7:C>G	TGCAGTGCTAGCATCCGTGCTGAAAAAAAGTGTCACTTTTGAGGCATGAGATCGGAAGAGCGGTTCAGC
	195	11046963	38:T>C	TGCAGTTCTTGAGCGTTCAATAAATAAATGCATCCCTTTAGATGTGCATGAGATCGGAAGAGCGGTTCA
	196	11047241	17:C>T	TGCAGGCCAGTTTACCACAATTTCTGAGCTAAAACGGTCTTTCTGCATGAGATCGGAAGAGCGGTTCAG
	197	11047311	44:C>G	TGCAGACACAGCGTCTTTTTTGGGGGGCTCAGTTGGTAGGGGTACCAGGGACAGCATGAGATCGGAAGA
	198	11048099	25:G>A	TGCAGGCTCCACCGTTTGACAGTTCGTATATAGTTAAGGGGTGGAGCCACCTGGTGACATTACGGACAG
	199	11048546	61:T>C	TGCAGTCTTCTGGGACACATTACAGGTCCTTGAAGACAGTGGGGCCATTCACAGAGTGCAGTACGCCTC
	200	11049827	9:C>A	TGCAGGCTTCATTTAGCCCGCCGCATGTTGGGCACTTTGTGGAATGGTAGCAGCATGAGATCGGAAGAG
	201	11049983	11:A>T	TGCAGTATATAAACTTATGTATGTACTGCCATGTGCATTGAGCATGAGATCGGAAGAGCGGTTCAGCAG
	202	11050072	17:T>C	TGCAGTCTTAGTAGATGTTTTGCACATTTTGCAACACAACAAAGTGCTTTAGCATGAGATCGGAAGAGC
	203	11050149	14:G>A	TGCAGTGGAGCCTCGAATTTTAGCATGAGATCGGAAGAGCGGTTCAGCAGGAATGCCGAGACCGATCTC
	204	11050150	7:G>A	TGCAGTGGAGCCTCAAATCGTAGCATGAGATCGGAAGAGCGGTTCAGCAGGAATGCCGAGACCGATCTC
	205	11050163	43:G>T	TGCAGTGGTGAAGAGCATTGAAGTGCATATTGGTACAGTGGCAGTGAGTGTTCAGGCATGAGATCGGAA
	206	11050215	28:C>T	TGCAGTTAGGCGAGAGGCCTTCCACTGTCAAAACTGGTGTGTCGGGCCAGAGCATGAGATCGGAAGAGC
	207	11050273	24:A>G	TGCAGAACGACCATGGCATCAAAAAAGCATGAGATCGGAAGAGCGGTTCAGCAGGAATGCCGAGACCGA
	208	11050514	5:A>C	TGCAGAATGTAACTGGACAGTGAAGAGAGAAGCAGCACAGTGATGATCTCATCACTCATTCACTATCAG
	209	11052024	5:T>C	TGCAGTGACCATTTATAAAGAGCAGCGTGGCTCATGCATGAGATCGGAAGAGCGGTTCAGCAGGAATGC
	210	11052241	12:A>G	TGCAGGTGTTCTATCAGATTAGCAAACCTGGTGGAGGTATGCATGAGATCGGAAGAGCGGTTCAGCAGG
	211	11052800	8:A>G	TGCAGATTAGATGATATCTCATCTACTCAGCTCTCTCCTCCTGTCAGCATGTTTCCTGTCAACAAATGC
	212	11053673	42:T>C	TGCAGATCCACTGATCAGCTCGGCGCTCGACTCCTCAGGCATTGCATGAGATCGGAAGAGCGGTTCAGC
	213	11055112	16:C>T	TGCAGCCGTGAAAACACGGCATGAGATCGGAAGAGCGGTTCAGCAGGAATGCCGAGACCGATCTCGTAT
	214	11056981	12:C>T	TGCAGGCTCTGCCAGTACGTATCCCTGATAGCTACTTTAAACAAGTGCATGAGATCGGAAGAGCGGTTC
	215	11058282	18:A>G	TGCAGGCAACAGTGAAGCATGGTGGAGGTACCTTGCATGAGATCGGAAGAGCGGTTCAGCAGGAATGCC
	216	11058785	10:T>C	TGCAGTGCTTTGCATCACATTATGGCAATTTTAACACTGCATGAGATCGGAAGAGCGGTTCAGCAGGAA
	217	11059268	12:C>G	TGCAGATCCTGACCTAGAGTGAAGAATAGGTGCACAGCTCCTGGGGTTTGCAGCATGAGATCGGAAGAG
	218	11059327	8:C>T	TGCAGGCACACTCCTGCCTGTCAGATGGATGCATTCAGGTGGCTGTGCTACTGCCTGATTGCCTCCACA
	219	11059328	50:C>G	TGCAGGCACACTCCTGCCTGTCAGATGGATGCATTCAGGTGGCTGTGCTACCACCCGATTGCCTCCACA
	220	11060127	38:C>T	TGCAGGCCAAATTCAATTTACCTGGTTGGATGCTATTCCGCTATTATCAACTGCGGCATGAGATCGGAA
